# Supplementary material for: Synthesis of alkynyl cyclopropa[ c ]coumarins via propargyl sulfonium salts as C1 synthons
Source: Royal Society of Chemistry journal article supplement (doi:10.1039/d4ob01089b), 2024-01-01

## Supporting Information

### Synthesis of Alkynyl Cyclopropa[c]coumarins via Propargyl Sulfonium Salts as C1 Synthons

Lavanya Chandrasekar, Yun-Zhen Hsieh, Hao-Tse Chou, Yu-Chen Huang, and Wei-Min Liu\*

Department of Chemistry, Fu Jen Catholic University, No.510, Zhongzheng Rd., Xinzhuang Dist.,  
New Taipei City 24205, Taiwan (R.O.C.)

Email: lavukanna1997@gmail.com, 133797@mail.fju.edu.tw

## Table of Contents

|                                                                                                               |     |
|---------------------------------------------------------------------------------------------------------------|-----|
| 1. Stereochemical study of 3a and 3a' (Figure S1) .....                                                       | S3  |
| 2. Time dependent NMR study of tetrahydrothiophene sulfonium salts under alkaline condition (Figure S2) ..... | S4  |
| 3. Stereochemical study of 3l and 3l' (Figure S3).....                                                        | S5  |
| 4. X-Ray Crystallography Data of 3l and 3l' .....                                                             | S6  |
| 5. NMR Spectra.....                                                                                           | S26 |

## 1. Stereochemical study of 3a and 3a' (Figure S1)

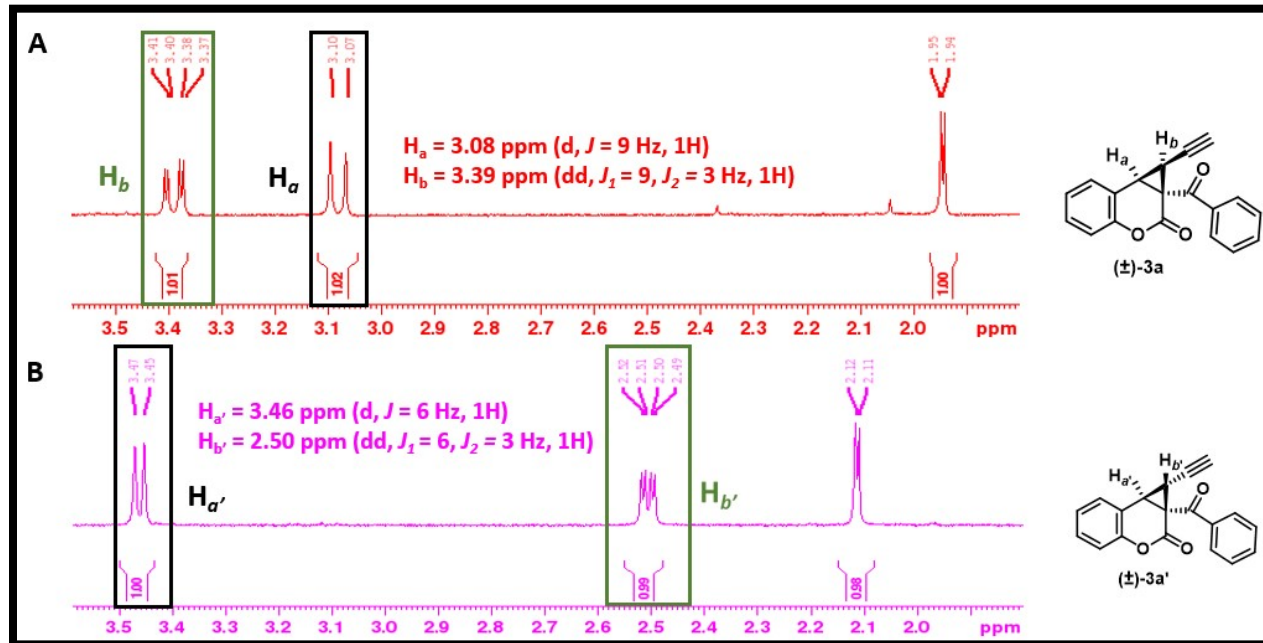

**Figure S1.** Zoom-in between 1.8 and 3.6 ppm of the  $^1\text{H}$  NMR spectra of isolated compound **3a** (A) and isolated compound **3a'**(B).

## 2. Time dependent NMR studies of tetrahydrothiophene sulfonium salts under alkaline condition

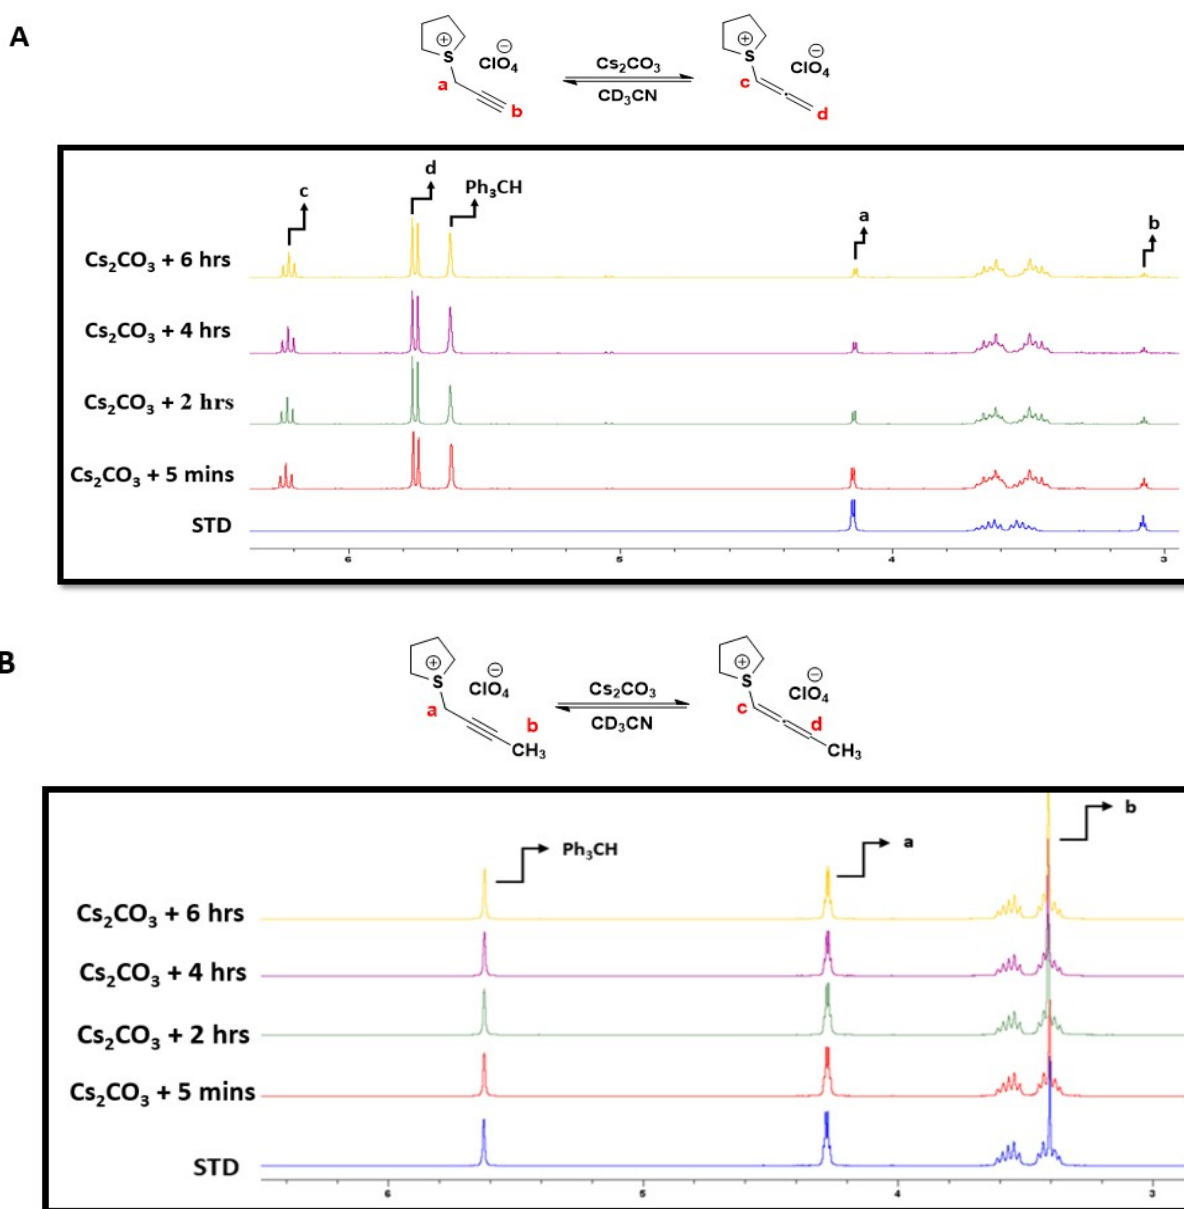

**Figure S2.** The time-dependent NMR studies were performed over 6 hours, with measurements taken at 2-hour intervals. This observation is made using triphenylmethane ( $\text{Ph}_3\text{CH}$ ) as an internal standard and  $\text{CD}_3\text{CN}$  as solvent. A) The figure illustrates that propargyl sulfonium salt **2b**, under alkaline conditions, undergoes isomerization. The ratio of isomerization of allenic sulfonium salt and propargyl sulfonium ylide is 2:1. The STD spectrum represents the initial spectrum of the sulfonium ylide **2b**. B) The figure indicates that sulfonium salt **2c**, under alkaline conditions, does not show characteristic allenic peaks for isomerization. The STD spectrum corresponds to the initial spectrum of the sulfonium ylide **2c**.

### 3. Stereochemical study of **31** and **31'** (Figure S3)

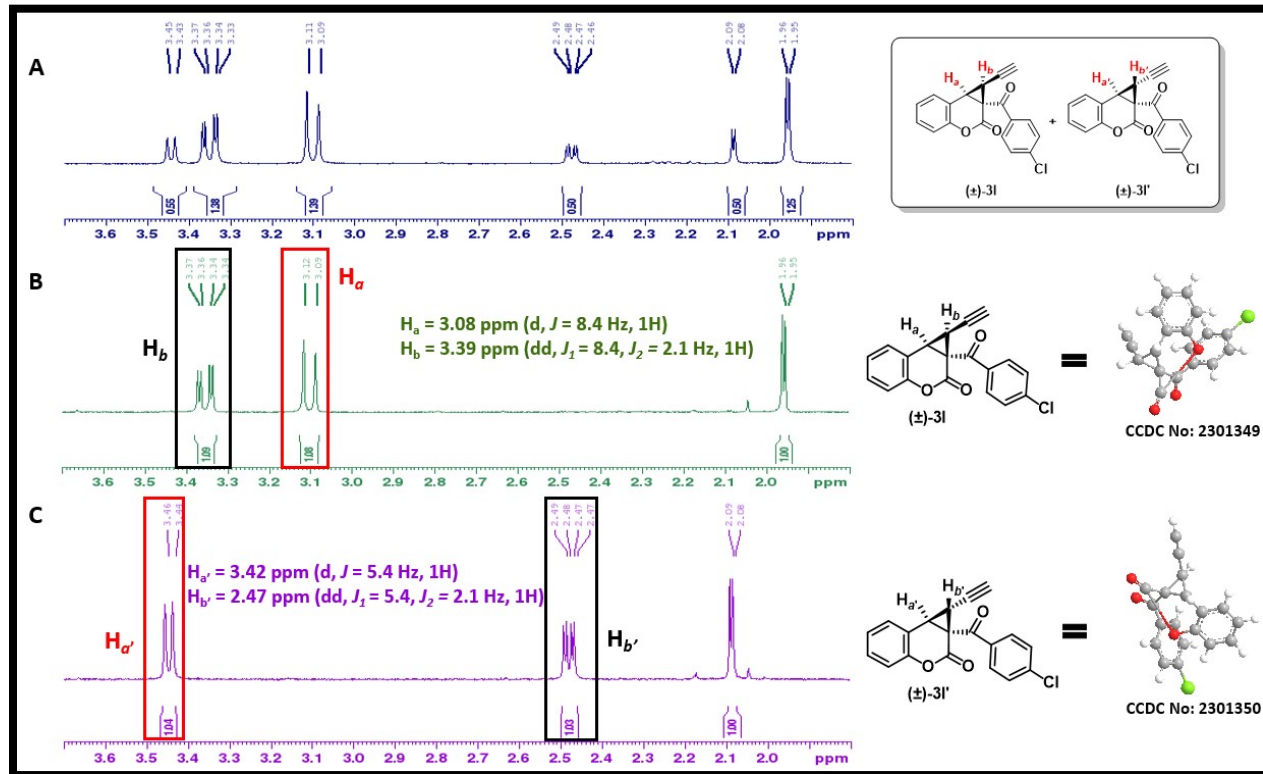

**Figure S3.** Zoom-in between 1.8 and 3.7 ppm of the  $^1\text{H}$  NMR spectra of the mixture of **31** and **31'** (A), isolated compound **31** (B), and isolated compound **31'** (C).

#### 4. X-Ray Crystallography Data of 3l

and 3l'

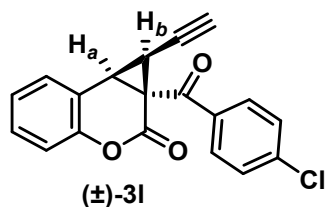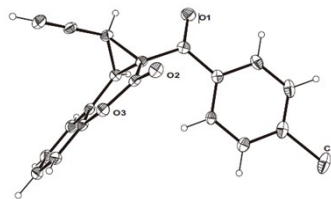

Table 1. Crystal data and structure refinement for d24730.

|                                   |                                                   |          |
|-----------------------------------|---------------------------------------------------|----------|
| Identification code               | d24730                                            |          |
| Empirical formula                 | C <sub>19</sub> H <sub>11</sub> Cl O <sub>3</sub> |          |
| Formula weight                    | 322.73                                            |          |
| Temperature                       | 200(2) K                                          |          |
| Wavelength                        | 1.54178 Å                                         |          |
| Crystal system                    | Orthorhombic                                      |          |
| Space group                       | P b c a                                           |          |
| Unit cell dimensions              | a = 7.1577(3) Å                                   | α = 90°. |
|                                   | b = 19.5983(8) Å                                  | β = 90°. |
|                                   | c = 21.4037(10) Å                                 | γ = 90°. |
| Volume                            | 3002.5(2) Å <sup>3</sup>                          |          |
| Z                                 | 8                                                 |          |
| Density (calculated)              | 1.428 Mg/m <sup>3</sup>                           |          |
| Absorption coefficient            | 2.363 mm <sup>-1</sup>                            |          |
| F(000)                            | 1328                                              |          |
| Crystal size                      | 0.72 x 0.55 x 0.09 mm <sup>3</sup>                |          |
| Theta range for data collection   | 4.51 to 66.80°.                                   |          |
| Index ranges                      | -6 ≤ h ≤ 8, -23 ≤ k ≤ 22, -19 ≤ l ≤ 25            |          |
| Reflections collected             | 9534                                              |          |
| Independent reflections           | 2623 [R(int) = 0.0441]                            |          |
| Completeness to theta = 66.80°    | 98.3 %                                            |          |
| Absorption correction             | None                                              |          |
| Max. and min. transmission        | 0.8155 and 0.2810                                 |          |
| Refinement method                 | Full-matrix least-squares on F <sup>2</sup>       |          |
| Data / restraints / parameters    | 2623 / 0 / 208                                    |          |
| Goodness-of-fit on F <sup>2</sup> | 1.047                                             |          |
| Final R indices [I > 2σ(I)]       | R1 = 0.0535, wR2 = 0.1451                         |          |

R indices (all data)

$R1 = 0.0575$ ,  $wR2 = 0.1492$

Largest diff. peak and hole

0.592 and -0.696 e.Å<sup>-3</sup>

Table 2. Atomic coordinates ( $\times 10^4$ ) and equivalent isotropic displacement parameters ( $\text{\AA}^2 \times 10^3$ ) for d24730.  $U(\text{eq})$  is defined as one third of the trace of the orthogonalized  $U^{ij}$  tensor.

|       | x        | y       | z       | $U(\text{eq})$ |
|-------|----------|---------|---------|----------------|
| C(1)  | 8743(4)  | 6274(1) | 6401(1) | 50(1)          |
| C(2)  | 8523(3)  | 6075(1) | 5789(1) | 44(1)          |
| C(3)  | 6863(3)  | 6227(1) | 5488(1) | 36(1)          |
| C(4)  | 5431(3)  | 6579(1) | 5795(1) | 36(1)          |
| C(5)  | 5712(4)  | 6787(1) | 6412(1) | 47(1)          |
| C(6)  | 7362(4)  | 6634(1) | 6715(1) | 54(1)          |
| C(7)  | 3654(3)  | 6758(1) | 5481(1) | 38(1)          |
| C(8)  | 3207(3)  | 6423(1) | 4865(1) | 33(1)          |
| C(9)  | 3220(3)  | 5663(1) | 4854(1) | 33(1)          |
| C(10) | 4284(3)  | 5683(1) | 3782(1) | 36(1)          |
| C(11) | 4854(3)  | 5266(1) | 3296(1) | 47(1)          |
| C(12) | 5570(3)  | 5564(2) | 2764(1) | 55(1)          |
| C(13) | 5735(3)  | 6267(2) | 2721(1) | 55(1)          |
| C(14) | 5161(3)  | 6673(1) | 3212(1) | 46(1)          |
| C(15) | 4393(3)  | 6385(1) | 3749(1) | 36(1)          |
| C(16) | 3695(3)  | 6804(1) | 4271(1) | 36(1)          |
| C(17) | 1675(3)  | 6752(1) | 4472(1) | 37(1)          |
| C(18) | 361(3)   | 6324(1) | 4148(1) | 41(1)          |
| C(19) | -700(3)  | 5953(2) | 3898(1) | 56(1)          |
| Cl(1) | 10788(1) | 6057(1) | 6793(1) | 77(1)          |
| O(1)  | 2617(3)  | 7192(1) | 5694(1) | 55(1)          |
| O(2)  | 2819(2)  | 5324(1) | 5299(1) | 43(1)          |
| O(3)  | 3617(2)  | 5342(1) | 4311(1) | 38(1)          |



Table 3. Bond lengths [Å] and angles [°] for d24730.

---

|             |          |
|-------------|----------|
| C(1)-C(2)   | 1.375(3) |
| C(1)-C(6)   | 1.390(4) |
| C(1)-Cl(1)  | 1.741(3) |
| C(2)-C(3)   | 1.384(3) |
| C(2)-H(2)   | 0.9500   |
| C(3)-C(4)   | 1.398(3) |
| C(3)-H(3)   | 0.9500   |
| C(4)-C(5)   | 1.397(3) |
| C(4)-C(7)   | 1.481(3) |
| C(5)-C(6)   | 1.380(4) |
| C(5)-H(5)   | 0.9500   |
| C(6)-H(6)   | 0.9500   |
| C(7)-O(1)   | 1.217(3) |
| C(7)-C(8)   | 1.506(3) |
| C(8)-C(9)   | 1.490(3) |
| C(8)-C(16)  | 1.517(3) |
| C(8)-C(17)  | 1.526(3) |
| C(9)-O(2)   | 1.197(3) |
| C(9)-O(3)   | 1.351(2) |
| C(10)-C(15) | 1.380(3) |
| C(10)-C(11) | 1.384(3) |
| C(10)-O(3)  | 1.397(3) |
| C(11)-C(12) | 1.380(4) |
| C(11)-H(11) | 0.9500   |
| C(12)-C(13) | 1.385(4) |
| C(12)-H(12) | 0.9500   |
| C(13)-C(14) | 1.382(4) |
| C(13)-H(13) | 0.9500   |
| C(14)-C(15) | 1.393(3) |
| C(14)-H(14) | 0.9500   |
| C(15)-C(16) | 1.474(3) |
| C(16)-C(17) | 1.512(3) |
| C(16)-H(16) | 1.0000   |
| C(17)-C(18) | 1.437(3) |

|                   |            |
|-------------------|------------|
| C(17)-H(17)       | 1.0000     |
| C(18)-C(19)       | 1.180(4)   |
| C(19)-H(19)       | 0.9500     |
| C(2)-C(1)-C(6)    | 121.6(2)   |
| C(2)-C(1)-Cl(1)   | 119.1(2)   |
| C(6)-C(1)-Cl(1)   | 119.26(19) |
| C(1)-C(2)-C(3)    | 118.7(2)   |
| C(1)-C(2)-H(2)    | 120.6      |
| C(3)-C(2)-H(2)    | 120.6      |
| C(2)-C(3)-C(4)    | 121.1(2)   |
| C(2)-C(3)-H(3)    | 119.5      |
| C(4)-C(3)-H(3)    | 119.5      |
| C(5)-C(4)-C(3)    | 118.9(2)   |
| C(5)-C(4)-C(7)    | 118.9(2)   |
| C(3)-C(4)-C(7)    | 122.23(19) |
| C(6)-C(5)-C(4)    | 120.3(2)   |
| C(6)-C(5)-H(5)    | 119.8      |
| C(4)-C(5)-H(5)    | 119.8      |
| C(5)-C(6)-C(1)    | 119.4(2)   |
| C(5)-C(6)-H(6)    | 120.3      |
| C(1)-C(6)-H(6)    | 120.3      |
| O(1)-C(7)-C(4)    | 121.3(2)   |
| O(1)-C(7)-C(8)    | 120.2(2)   |
| C(4)-C(7)-C(8)    | 118.37(18) |
| C(9)-C(8)-C(7)    | 116.73(16) |
| C(9)-C(8)-C(16)   | 118.48(17) |
| C(7)-C(8)-C(16)   | 118.03(16) |
| C(9)-C(8)-C(17)   | 114.67(16) |
| C(7)-C(8)-C(17)   | 116.83(17) |
| C(16)-C(8)-C(17)  | 59.61(13)  |
| O(2)-C(9)-O(3)    | 118.53(18) |
| O(2)-C(9)-C(8)    | 122.68(19) |
| O(3)-C(9)-C(8)    | 118.72(17) |
| C(15)-C(10)-C(11) | 122.2(2)   |
| C(15)-C(10)-O(3)  | 122.46(18) |

|                   |            |
|-------------------|------------|
| C(11)-C(10)-O(3)  | 115.33(19) |
| C(12)-C(11)-C(10) | 118.7(2)   |
| C(12)-C(11)-H(11) | 120.6      |
| C(10)-C(11)-H(11) | 120.6      |
| C(11)-C(12)-C(13) | 120.5(2)   |
| C(11)-C(12)-H(12) | 119.8      |
| C(13)-C(12)-H(12) | 119.8      |
| C(14)-C(13)-C(12) | 119.8(2)   |
| C(14)-C(13)-H(13) | 120.1      |
| C(12)-C(13)-H(13) | 120.1      |
| C(13)-C(14)-C(15) | 120.7(2)   |
| C(13)-C(14)-H(14) | 119.6      |
| C(15)-C(14)-H(14) | 119.6      |
| C(10)-C(15)-C(14) | 118.0(2)   |
| C(10)-C(15)-C(16) | 119.86(18) |
| C(14)-C(15)-C(16) | 122.2(2)   |
| C(15)-C(16)-C(17) | 120.11(18) |
| C(15)-C(16)-C(8)  | 116.06(17) |
| C(17)-C(16)-C(8)  | 60.50(13)  |
| C(15)-C(16)-H(16) | 116.2      |
| C(17)-C(16)-H(16) | 116.2      |
| C(8)-C(16)-H(16)  | 116.2      |
| C(18)-C(17)-C(16) | 121.89(19) |
| C(18)-C(17)-C(8)  | 119.38(17) |
| C(16)-C(17)-C(8)  | 59.89(13)  |
| C(18)-C(17)-H(17) | 114.9      |
| C(16)-C(17)-H(17) | 114.9      |
| C(8)-C(17)-H(17)  | 114.9      |
| C(19)-C(18)-C(17) | 177.3(3)   |
| C(18)-C(19)-H(19) | 180.0      |
| C(9)-O(3)-C(10)   | 123.13(16) |

---

Symmetry transformations used to generate equivalent atoms:

Table 4. Anisotropic displacement parameters ( $\text{\AA}^2 \times 10^3$ ) for d24730. The anisotropic displacement factor exponent takes the form:  $-2\pi^2 [ h^2 a^{*2} U^{11} + \dots + 2 h k a^* b^* U^{12} ]$

|       | $U^{11}$ | $U^{22}$ | $U^{33}$ | $U^{23}$ | $U^{13}$ | $U^{12}$ |
|-------|----------|----------|----------|----------|----------|----------|
| C(1)  | 53(1)    | 52(1)    | 44(1)    | 15(1)    | -14(1)   | -20(1)   |
| C(2)  | 43(1)    | 40(1)    | 50(1)    | 4(1)     | -8(1)    | -9(1)    |
| C(3)  | 40(1)    | 33(1)    | 36(1)    | 0(1)     | -6(1)    | -6(1)    |
| C(4)  | 42(1)    | 30(1)    | 37(1)    | 2(1)     | -1(1)    | -10(1)   |
| C(5)  | 57(1)    | 49(1)    | 36(1)    | -3(1)    | 6(1)     | -15(1)   |
| C(6)  | 66(2)    | 63(2)    | 34(1)    | 5(1)     | -9(1)    | -29(1)   |
| C(7)  | 40(1)    | 29(1)    | 44(1)    | 1(1)     | 4(1)     | -5(1)    |
| C(8)  | 30(1)    | 28(1)    | 40(1)    | 3(1)     | -2(1)    | 1(1)     |
| C(9)  | 26(1)    | 30(1)    | 43(1)    | 1(1)     | -7(1)    | 0(1)     |
| C(10) | 26(1)    | 41(1)    | 42(1)    | -4(1)    | -5(1)    | -1(1)    |
| C(11) | 36(1)    | 52(1)    | 53(1)    | -16(1)   | -5(1)    | 1(1)     |
| C(12) | 36(1)    | 80(2)    | 49(1)    | -21(1)   | -3(1)    | 1(1)     |
| C(13) | 36(1)    | 86(2)    | 42(1)    | 0(1)     | 2(1)     | -6(1)    |
| C(14) | 36(1)    | 56(1)    | 45(1)    | 5(1)     | 0(1)     | -5(1)    |
| C(15) | 27(1)    | 42(1)    | 39(1)    | 1(1)     | -5(1)    | -2(1)    |
| C(16) | 38(1)    | 28(1)    | 42(1)    | 4(1)     | -1(1)    | -2(1)    |
| C(17) | 36(1)    | 33(1)    | 44(1)    | 6(1)     | -1(1)    | 8(1)     |
| C(18) | 30(1)    | 50(1)    | 44(1)    | 7(1)     | -2(1)    | 9(1)     |
| C(19) | 34(1)    | 76(2)    | 57(2)    | -2(1)    | -5(1)    | -2(1)    |
| Cl(1) | 68(1)    | 93(1)    | 68(1)    | 25(1)    | -37(1)   | -21(1)   |
| O(1)  | 55(1)    | 47(1)    | 64(1)    | -18(1)   | 0(1)     | 10(1)    |
| O(2)  | 46(1)    | 33(1)    | 49(1)    | 9(1)     | -4(1)    | -4(1)    |
| O(3)  | 40(1)    | 28(1)    | 46(1)    | -2(1)    | -4(1)    | -1(1)    |

Table 5. Hydrogen coordinates ( $\times 10^4$ ) and isotropic displacement parameters ( $\text{\AA}^2 \times 10^3$ ) for d24730.

|       | x     | y    | z    | U(eq) |
|-------|-------|------|------|-------|
| H(2)  | 9491  | 5837 | 5577 | 53    |
| H(3)  | 6693  | 6091 | 5066 | 43    |
| H(5)  | 4763  | 7035 | 6623 | 57    |
| H(6)  | 7551  | 6775 | 7135 | 65    |
| H(11) | 4753  | 4784 | 3328 | 56    |
| H(12) | 5952  | 5286 | 2424 | 66    |
| H(13) | 6243  | 6469 | 2355 | 66    |
| H(14) | 5290  | 7155 | 3184 | 55    |
| H(16) | 4300  | 7260 | 4326 | 43    |
| H(17) | 1135  | 7180 | 4650 | 45    |
| H(19) | -1554 | 5654 | 3697 | 67    |

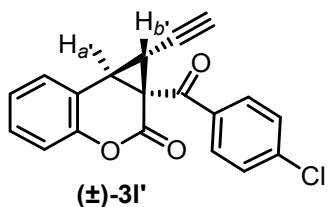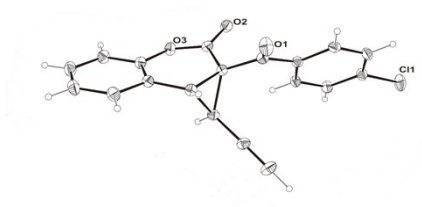

Table 1. Crystal data and structure refinement for d24731.

|                      |                                                   |                       |
|----------------------|---------------------------------------------------|-----------------------|
| Identification code  | d24731                                            |                       |
| Empirical formula    | C <sub>19</sub> H <sub>11</sub> Cl O <sub>3</sub> |                       |
| Formula weight       | 322.73                                            |                       |
| Temperature          | 200(2) K                                          |                       |
| Wavelength           | 1.54178 Å                                         |                       |
| Crystal system       | Monoclinic                                        |                       |
| Space group          | P 2 <sub>1</sub> /n                               |                       |
| Unit cell dimensions | a = 9.5190(3) Å                                   | $\alpha = 90^\circ$ . |

|                                        |                                                                    |                               |
|----------------------------------------|--------------------------------------------------------------------|-------------------------------|
|                                        | $b = 14.8049(4) \text{ \AA}$                                       | $\beta = 90.7470(10)^\circ$ . |
|                                        | $c = 21.6031(6) \text{ \AA}$                                       | $\gamma = 90^\circ$ .         |
| Volume                                 | 3044.22(15) $\text{\AA}^3$                                         |                               |
| Z                                      | 8                                                                  |                               |
| Density (calculated)                   | 1.408 $\text{Mg/m}^3$                                              |                               |
| Absorption coefficient                 | 2.330 $\text{mm}^{-1}$                                             |                               |
| F(000)                                 | 1328                                                               |                               |
| Crystal size                           | 0.57 x 0.20 x 0.11 $\text{mm}^3$                                   |                               |
| Theta range for data collection        | 3.62 to 66.54 $^\circ$ .                                           |                               |
| Index ranges                           | -11 $\leq h \leq 10$ , -17 $\leq k \leq 17$ , -25 $\leq l \leq 24$ |                               |
| Reflections collected                  | 16059                                                              |                               |
| Independent reflections                | 5295 [R(int) = 0.0445]                                             |                               |
| Completeness to theta = 66.54 $^\circ$ | 98.6 %                                                             |                               |
| Absorption correction                  | None                                                               |                               |
| Max. and min. transmission             | 0.7836 and 0.3501                                                  |                               |
| Refinement method                      | Full-matrix least-squares on F <sup>2</sup>                        |                               |
| Data / restraints / parameters         | 5295 / 0 / 415                                                     |                               |
| Goodness-of-fit on F <sup>2</sup>      | 0.440                                                              |                               |
| Final R indices [I > 2 $\sigma$ (I)]   | R1 = 0.0471, wR2 = 0.1169                                          |                               |
| R indices (all data)                   | R1 = 0.0523, wR2 = 0.1247                                          |                               |
| Largest diff. peak and hole            | 0.210 and -0.565 $\text{e.\AA}^{-3}$                               |                               |

Table 2. Atomic coordinates ( $\times 10^4$ ) and equivalent isotropic displacement parameters ( $\text{\AA}^2 \times 10^3$ ) for d24731.  $U(\text{eq})$  is defined as one third of the trace of the orthogonalized  $U^{ij}$  tensor.

|       | x       | y       | z       | $U(\text{eq})$ |
|-------|---------|---------|---------|----------------|
| C(1)  | 133(2)  | 664(2)  | 7604(1) | 42(1)          |
| C(2)  | 706(2)  | 1347(1) | 7250(1) | 41(1)          |
| C(3)  | 2126(2) | 1534(1) | 7305(1) | 37(1)          |
| C(4)  | 2978(2) | 1038(1) | 7711(1) | 34(1)          |
| C(5)  | 2376(2) | 336(1)  | 8047(1) | 37(1)          |
| C(6)  | 961(2)  | 150(1)  | 8000(1) | 41(1)          |
| C(7)  | 4465(2) | 1274(1) | 7852(1) | 37(1)          |
| C(8)  | 5212(2) | 1972(1) | 7462(1) | 32(1)          |
| C(9)  | 5474(2) | 1726(1) | 6808(1) | 35(1)          |
| C(10) | 7499(2) | 2724(1) | 6786(1) | 37(1)          |
| C(11) | 8560(2) | 3034(2) | 6410(1) | 46(1)          |
| C(12) | 9654(2) | 3516(2) | 6676(1) | 52(1)          |
| C(13) | 9688(2) | 3673(2) | 7309(1) | 52(1)          |
| C(14) | 8611(2) | 3357(2) | 7676(1) | 46(1)          |
| C(15) | 7487(2) | 2882(1) | 7417(1) | 36(1)          |
| C(16) | 6268(2) | 2589(1) | 7781(1) | 36(1)          |
| C(17) | 4852(2) | 2973(1) | 7589(1) | 37(1)          |
| C(18) | 3804(2) | 3188(2) | 8041(1) | 44(1)          |
| C(19) | 2931(3) | 3381(2) | 8401(1) | 58(1)          |
| C(20) | -348(3) | 894(2)  | 5503(1) | 68(1)          |
| C(21) | 1021(3) | 827(2)  | 5735(1) | 57(1)          |
| C(22) | 2044(2) | 1373(2) | 5483(1) | 46(1)          |
| C(23) | 1719(2) | 1955(2) | 4994(1) | 45(1)          |
| C(24) | 341(2)  | 1988(2) | 4763(1) | 61(1)          |
| C(25) | -684(3) | 1462(2) | 5019(1) | 74(1)          |
| C(26) | 2797(2) | 2508(1) | 4687(1) | 41(1)          |
| C(27) | 4127(2) | 2780(1) | 5034(1) | 35(1)          |
| C(28) | 3961(2) | 3255(1) | 5639(1) | 39(1)          |
| C(29) | 6057(2) | 4146(1) | 5441(1) | 40(1)          |
| C(30) | 6867(2) | 4853(2) | 5670(1) | 51(1)          |
| C(31) | 7967(3) | 5163(2) | 5319(1) | 55(1)          |

|       |          |         |         |        |
|-------|----------|---------|---------|--------|
| C(32) | 8257(3)  | 4776(2) | 4752(1) | 56(1)  |
| C(33) | 7432(3)  | 4071(2) | 4534(1) | 49(1)  |
| C(34) | 6306(2)  | 3753(1) | 4873(1) | 39(1)  |
| C(35) | 5388(2)  | 3018(1) | 4650(1) | 37(1)  |
| C(36) | 5390(2)  | 2124(1) | 4986(1) | 33(1)  |
| C(37) | 5209(2)  | 1306(1) | 4631(1) | 35(1)  |
| C(38) | 5088(2)  | 644(1)  | 4330(1) | 44(1)  |
| Cl(1) | -1660(1) | 445(1)  | 7564(1) | 66(1)  |
| Cl(2) | -1649(1) | 241(1)  | 5834(1) | 103(1) |
| O(1)  | 5079(2)  | 953(1)  | 8297(1) | 59(1)  |
| O(2)  | 4867(2)  | 1133(1) | 6536(1) | 47(1)  |
| O(3)  | 6442(2)  | 2209(1) | 6492(1) | 41(1)  |
| O(4)  | 2664(2)  | 2739(1) | 4148(1) | 57(1)  |
| O(5)  | 3000(2)  | 3145(1) | 5986(1) | 55(1)  |
| O(6)  | 4968(2)  | 3855(1) | 5820(1) | 49(1)  |

---



Table 3. Bond lengths [Å] and angles [°] for d24731.

---

|             |          |
|-------------|----------|
| C(1)-C(2)   | 1.385(3) |
| C(1)-C(6)   | 1.383(3) |
| C(1)-Cl(1)  | 1.738(2) |
| C(2)-C(3)   | 1.383(3) |
| C(2)-H(2)   | 0.9500   |
| C(3)-C(4)   | 1.395(3) |
| C(3)-H(3)   | 0.9500   |
| C(4)-C(5)   | 1.395(3) |
| C(4)-C(7)   | 1.486(3) |
| C(5)-C(6)   | 1.378(3) |
| C(5)-H(5)   | 0.9500   |
| C(6)-H(6)   | 0.9500   |
| C(7)-O(1)   | 1.215(2) |
| C(7)-C(8)   | 1.516(3) |
| C(8)-C(9)   | 1.484(3) |
| C(8)-C(16)  | 1.517(3) |
| C(8)-C(17)  | 1.547(3) |
| C(9)-O(2)   | 1.201(2) |
| C(9)-O(3)   | 1.358(2) |
| C(10)-C(15) | 1.384(3) |
| C(10)-C(11) | 1.383(3) |
| C(10)-O(3)  | 1.407(2) |
| C(11)-C(12) | 1.382(3) |
| C(11)-H(11) | 0.9500   |
| C(12)-C(13) | 1.388(4) |
| C(12)-H(12) | 0.9500   |
| C(13)-C(14) | 1.385(3) |
| C(13)-H(13) | 0.9500   |
| C(14)-C(15) | 1.392(3) |
| C(14)-H(14) | 0.9500   |
| C(15)-C(16) | 1.476(3) |
| C(16)-C(17) | 1.517(3) |
| C(16)-H(16) | 1.0000   |
| C(17)-C(18) | 1.441(3) |

|             |          |
|-------------|----------|
| C(17)-H(17) | 1.0000   |
| C(18)-C(19) | 1.181(3) |
| C(19)-H(19) | 0.9500   |
| C(20)-C(25) | 1.376(5) |
| C(20)-C(21) | 1.395(4) |
| C(20)-Cl(2) | 1.732(3) |
| C(21)-C(22) | 1.383(3) |
| C(21)-H(21) | 0.9500   |
| C(22)-C(23) | 1.394(3) |
| C(22)-H(22) | 0.9500   |
| C(23)-C(24) | 1.398(3) |
| C(23)-C(26) | 1.477(3) |
| C(24)-C(25) | 1.370(4) |
| C(24)-H(24) | 0.9500   |
| C(25)-H(25) | 0.9500   |
| C(26)-O(4)  | 1.218(3) |
| C(26)-C(27) | 1.518(3) |
| C(27)-C(28) | 1.494(3) |
| C(27)-C(35) | 1.511(3) |
| C(27)-C(36) | 1.551(3) |
| C(28)-O(5)  | 1.201(3) |
| C(28)-O(6)  | 1.360(2) |
| C(29)-C(30) | 1.388(3) |
| C(29)-C(34) | 1.381(3) |
| C(29)-O(6)  | 1.397(3) |
| C(30)-C(31) | 1.380(4) |
| C(30)-H(30) | 0.9500   |
| C(31)-C(32) | 1.382(4) |
| C(31)-H(31) | 0.9500   |
| C(32)-C(33) | 1.386(3) |
| C(32)-H(32) | 0.9500   |
| C(33)-C(34) | 1.389(3) |
| C(33)-H(33) | 0.9500   |
| C(34)-C(35) | 1.472(3) |
| C(35)-C(36) | 1.511(3) |
| C(35)-H(35) | 1.0000   |

|                   |            |
|-------------------|------------|
| C(36)-C(37)       | 1.443(3)   |
| C(36)-H(36)       | 1.0000     |
| C(37)-C(38)       | 1.182(3)   |
| C(38)-H(38)       | 0.9500     |
| C(2)-C(1)-C(6)    | 121.19(19) |
| C(2)-C(1)-Cl(1)   | 120.16(17) |
| C(6)-C(1)-Cl(1)   | 118.65(16) |
| C(3)-C(2)-C(1)    | 119.32(19) |
| C(3)-C(2)-H(2)    | 120.3      |
| C(1)-C(2)-H(2)    | 120.3      |
| C(2)-C(3)-C(4)    | 120.56(18) |
| C(2)-C(3)-H(3)    | 119.7      |
| C(4)-C(3)-H(3)    | 119.7      |
| C(3)-C(4)-C(5)    | 118.69(18) |
| C(3)-C(4)-C(7)    | 123.38(18) |
| C(5)-C(4)-C(7)    | 117.65(17) |
| C(6)-C(5)-C(4)    | 121.21(19) |
| C(6)-C(5)-H(5)    | 119.4      |
| C(4)-C(5)-H(5)    | 119.4      |
| C(5)-C(6)-C(1)    | 118.99(19) |
| C(5)-C(6)-H(6)    | 120.5      |
| C(1)-C(6)-H(6)    | 120.5      |
| O(1)-C(7)-C(4)    | 121.20(18) |
| O(1)-C(7)-C(8)    | 118.77(18) |
| C(4)-C(7)-C(8)    | 119.90(16) |
| C(9)-C(8)-C(16)   | 117.50(16) |
| C(9)-C(8)-C(7)    | 116.56(16) |
| C(16)-C(8)-C(7)   | 118.10(16) |
| C(9)-C(8)-C(17)   | 116.34(16) |
| C(16)-C(8)-C(17)  | 59.34(13)  |
| C(7)-C(8)-C(17)   | 116.71(16) |
| O(2)-C(9)-O(3)    | 117.64(17) |
| O(2)-C(9)-C(8)    | 124.06(19) |
| O(3)-C(9)-C(8)    | 118.30(16) |
| C(15)-C(10)-C(11) | 122.56(19) |

|                   |            |
|-------------------|------------|
| C(15)-C(10)-O(3)  | 121.40(17) |
| C(11)-C(10)-O(3)  | 116.01(18) |
| C(12)-C(11)-C(10) | 118.7(2)   |
| C(12)-C(11)-H(11) | 120.7      |
| C(10)-C(11)-H(11) | 120.7      |
| C(11)-C(12)-C(13) | 120.3(2)   |
| C(11)-C(12)-H(12) | 119.9      |
| C(13)-C(12)-H(12) | 119.9      |
| C(14)-C(13)-C(12) | 120.0(2)   |
| C(14)-C(13)-H(13) | 120.0      |
| C(12)-C(13)-H(13) | 120.0      |
| C(13)-C(14)-C(15) | 120.7(2)   |
| C(13)-C(14)-H(14) | 119.6      |
| C(15)-C(14)-H(14) | 119.6      |
| C(10)-C(15)-C(14) | 117.77(19) |
| C(10)-C(15)-C(16) | 119.53(17) |
| C(14)-C(15)-C(16) | 122.62(18) |
| C(15)-C(16)-C(8)  | 117.09(16) |
| C(15)-C(16)-C(17) | 116.41(17) |
| C(8)-C(16)-C(17)  | 61.31(12)  |
| C(15)-C(16)-H(16) | 116.8      |
| C(8)-C(16)-H(16)  | 116.8      |
| C(17)-C(16)-H(16) | 116.8      |
| C(18)-C(17)-C(16) | 121.13(17) |
| C(18)-C(17)-C(8)  | 119.17(18) |
| C(16)-C(17)-C(8)  | 59.35(12)  |
| C(18)-C(17)-H(17) | 115.3      |
| C(16)-C(17)-H(17) | 115.3      |
| C(8)-C(17)-H(17)  | 115.3      |
| C(19)-C(18)-C(17) | 178.1(3)   |
| C(18)-C(19)-H(19) | 180.0      |
| C(25)-C(20)-C(21) | 121.6(3)   |
| C(25)-C(20)-Cl(2) | 119.6(2)   |
| C(21)-C(20)-Cl(2) | 118.7(3)   |
| C(22)-C(21)-C(20) | 118.4(3)   |
| C(22)-C(21)-H(21) | 120.8      |

|                   |            |
|-------------------|------------|
| C(20)-C(21)-H(21) | 120.8      |
| C(21)-C(22)-C(23) | 120.6(2)   |
| C(21)-C(22)-H(22) | 119.7      |
| C(23)-C(22)-H(22) | 119.7      |
| C(22)-C(23)-C(24) | 119.3(2)   |
| C(22)-C(23)-C(26) | 122.32(19) |
| C(24)-C(23)-C(26) | 118.3(2)   |
| C(25)-C(24)-C(23) | 120.4(3)   |
| C(25)-C(24)-H(24) | 119.8      |
| C(23)-C(24)-H(24) | 119.8      |
| C(24)-C(25)-C(20) | 119.6(2)   |
| C(24)-C(25)-H(25) | 120.2      |
| C(20)-C(25)-H(25) | 120.2      |
| O(4)-C(26)-C(23)  | 121.43(19) |
| O(4)-C(26)-C(27)  | 118.3(2)   |
| C(23)-C(26)-C(27) | 120.28(18) |
| C(28)-C(27)-C(26) | 117.43(17) |
| C(28)-C(27)-C(35) | 117.74(17) |
| C(26)-C(27)-C(35) | 116.97(16) |
| C(28)-C(27)-C(36) | 116.36(16) |
| C(26)-C(27)-C(36) | 116.28(16) |
| C(35)-C(27)-C(36) | 59.13(12)  |
| O(5)-C(28)-O(6)   | 116.67(18) |
| O(5)-C(28)-C(27)  | 124.95(19) |
| O(6)-C(28)-C(27)  | 118.38(18) |
| C(30)-C(29)-C(34) | 122.3(2)   |
| C(30)-C(29)-O(6)  | 115.91(19) |
| C(34)-C(29)-O(6)  | 121.83(18) |
| C(29)-C(30)-C(31) | 118.5(2)   |
| C(29)-C(30)-H(30) | 120.8      |
| C(31)-C(30)-H(30) | 120.8      |
| C(32)-C(31)-C(30) | 120.7(2)   |
| C(32)-C(31)-H(31) | 119.6      |
| C(30)-C(31)-H(31) | 119.6      |
| C(31)-C(32)-C(33) | 119.7(2)   |
| C(31)-C(32)-H(32) | 120.1      |

|                   |            |
|-------------------|------------|
| C(33)-C(32)-H(32) | 120.1      |
| C(32)-C(33)-C(34) | 120.9(2)   |
| C(32)-C(33)-H(33) | 119.6      |
| C(34)-C(33)-H(33) | 119.6      |
| C(29)-C(34)-C(33) | 117.9(2)   |
| C(29)-C(34)-C(35) | 119.65(19) |
| C(33)-C(34)-C(35) | 122.42(19) |
| C(34)-C(35)-C(27) | 117.68(17) |
| C(34)-C(35)-C(36) | 119.49(16) |
| C(27)-C(35)-C(36) | 61.75(13)  |
| C(34)-C(35)-H(35) | 115.7      |
| C(27)-C(35)-H(35) | 115.7      |
| C(36)-C(35)-H(35) | 115.7      |
| C(37)-C(36)-C(35) | 118.69(16) |
| C(37)-C(36)-C(27) | 118.30(16) |
| C(35)-C(36)-C(27) | 59.11(13)  |
| C(37)-C(36)-H(36) | 116.2      |
| C(35)-C(36)-H(36) | 116.2      |
| C(27)-C(36)-H(36) | 116.2      |
| C(38)-C(37)-C(36) | 178.2(2)   |
| C(37)-C(38)-H(38) | 180.0      |
| C(9)-O(3)-C(10)   | 122.97(15) |
| C(28)-O(6)-C(29)  | 124.00(16) |

---

Symmetry transformations used to generate equivalent atoms:

Table 4. Anisotropic displacement parameters ( $\text{\AA}^2 \times 10^3$ ) for d24731. The anisotropic displacement factor exponent takes the form:  $-2\pi^2 [ h^2 a^{*2} U^{11} + \dots + 2 h k a^* b^* U^{12} ]$

|       | U <sup>11</sup> | U <sup>22</sup> | U <sup>33</sup> | U <sup>23</sup> | U <sup>13</sup> | U <sup>12</sup> |
|-------|-----------------|-----------------|-----------------|-----------------|-----------------|-----------------|
| C(1)  | 40(1)           | 43(1)           | 44(1)           | -3(1)           | 3(1)            | -9(1)           |
| C(2)  | 37(1)           | 43(1)           | 43(1)           | 6(1)            | -4(1)           | 1(1)            |
| C(3)  | 38(1)           | 35(1)           | 37(1)           | 5(1)            | 1(1)            | -3(1)           |
| C(4)  | 38(1)           | 33(1)           | 32(1)           | -2(1)           | 2(1)            | 1(1)            |
| C(5)  | 45(1)           | 32(1)           | 35(1)           | 1(1)            | 0(1)            | 3(1)            |
| C(6)  | 48(1)           | 34(1)           | 41(1)           | 3(1)            | 4(1)            | -8(1)           |
| C(7)  | 38(1)           | 39(1)           | 34(1)           | 2(1)            | 0(1)            | 4(1)            |
| C(8)  | 31(1)           | 35(1)           | 28(1)           | -1(1)           | -2(1)           | 2(1)            |
| C(9)  | 33(1)           | 40(1)           | 33(1)           | -4(1)           | -2(1)           | 4(1)            |
| C(10) | 35(1)           | 40(1)           | 35(1)           | 2(1)            | -3(1)           | 0(1)            |
| C(11) | 46(1)           | 51(1)           | 39(1)           | 8(1)            | 5(1)            | 1(1)            |
| C(12) | 43(1)           | 50(1)           | 63(2)           | 14(1)           | 5(1)            | -7(1)           |
| C(13) | 43(1)           | 50(1)           | 62(2)           | 5(1)            | -7(1)           | -12(1)          |
| C(14) | 45(1)           | 48(1)           | 44(1)           | -2(1)           | -7(1)           | -6(1)           |
| C(15) | 36(1)           | 37(1)           | 36(1)           | 0(1)            | -4(1)           | 0(1)            |
| C(16) | 38(1)           | 41(1)           | 29(1)           | -4(1)           | -2(1)           | -2(1)           |
| C(17) | 42(1)           | 35(1)           | 33(1)           | -3(1)           | 1(1)            | 2(1)            |
| C(18) | 45(1)           | 44(1)           | 41(1)           | -8(1)           | -1(1)           | 4(1)            |
| C(19) | 52(1)           | 73(2)           | 50(1)           | -14(1)          | 9(1)            | 12(1)           |
| C(20) | 42(1)           | 91(2)           | 71(2)           | -45(2)          | 20(1)           | -22(1)          |
| C(21) | 55(1)           | 62(2)           | 55(1)           | -21(1)          | 11(1)           | -12(1)          |
| C(22) | 38(1)           | 54(1)           | 47(1)           | -15(1)          | 0(1)            | -4(1)           |
| C(23) | 36(1)           | 56(1)           | 43(1)           | -17(1)          | -7(1)           | 5(1)            |
| C(24) | 36(1)           | 91(2)           | 57(1)           | -23(1)          | -8(1)           | 8(1)            |
| C(25) | 36(1)           | 117(3)          | 69(2)           | -39(2)          | -3(1)           | 1(1)            |
| C(26) | 43(1)           | 41(1)           | 40(1)           | -9(1)           | -9(1)           | 10(1)           |
| C(27) | 38(1)           | 37(1)           | 31(1)           | -4(1)           | -3(1)           | 6(1)            |
| C(28) | 39(1)           | 40(1)           | 38(1)           | -9(1)           | -1(1)           | 5(1)            |
| C(29) | 40(1)           | 36(1)           | 44(1)           | -4(1)           | -1(1)           | 2(1)            |
| C(30) | 51(1)           | 43(1)           | 60(1)           | -15(1)          | -6(1)           | 2(1)            |
| C(31) | 52(1)           | 37(1)           | 75(2)           | -4(1)           | -10(1)          | -3(1)           |

|       |       |        |        |        |        |        |
|-------|-------|--------|--------|--------|--------|--------|
| C(32) | 56(1) | 50(1)  | 63(2)  | 13(1)  | -2(1)  | -11(1) |
| C(33) | 58(1) | 46(1)  | 43(1)  | 6(1)   | 1(1)   | -6(1)  |
| C(34) | 47(1) | 33(1)  | 37(1)  | 3(1)   | -4(1)  | 1(1)   |
| C(35) | 46(1) | 37(1)  | 28(1)  | -2(1)  | -2(1)  | 1(1)   |
| C(36) | 35(1) | 37(1)  | 28(1)  | -3(1)  | 0(1)   | 2(1)   |
| C(37) | 37(1) | 37(1)  | 32(1)  | 1(1)   | 4(1)   | 2(1)   |
| C(38) | 51(1) | 37(1)  | 43(1)  | -6(1)  | 7(1)   | -2(1)  |
| Cl(1) | 41(1) | 78(1)  | 78(1)  | 16(1)  | -3(1)  | -18(1) |
| Cl(2) | 70(1) | 131(1) | 110(1) | -56(1) | 45(1)  | -50(1) |
| O(1)  | 48(1) | 72(1)  | 56(1)  | 28(1)  | -14(1) | -7(1)  |
| O(2)  | 42(1) | 55(1)  | 43(1)  | -18(1) | 0(1)   | -5(1)  |
| O(3)  | 40(1) | 55(1)  | 28(1)  | -3(1)  | 0(1)   | -7(1)  |
| O(4)  | 65(1) | 64(1)  | 43(1)  | -1(1)  | -19(1) | 2(1)   |
| O(5)  | 53(1) | 64(1)  | 49(1)  | -20(1) | 13(1)  | -7(1)  |
| O(6)  | 48(1) | 55(1)  | 44(1)  | -22(1) | 4(1)   | -7(1)  |

---



Table 5. Hydrogen coordinates ( $\times 10^4$ ) and isotropic displacement parameters ( $\text{\AA}^2 \times 10^3$ ) for d24731.

|       | x     | y    | z    | U(eq) |
|-------|-------|------|------|-------|
| H(2)  | 130   | 1685 | 6972 | 49    |
| H(3)  | 2524  | 2003 | 7064 | 44    |
| H(5)  | 2954  | -20  | 8313 | 45    |
| H(6)  | 561   | -324 | 8235 | 49    |
| H(11) | 8538  | 2917 | 5977 | 55    |
| H(12) | 10386 | 3742 | 6424 | 62    |
| H(13) | 10451 | 3996 | 7491 | 62    |
| H(14) | 8639  | 3467 | 8109 | 55    |
| H(16) | 6433  | 2490 | 8234 | 43    |
| H(17) | 4862  | 3377 | 7217 | 44    |
| H(19) | 2228  | 3537 | 8690 | 70    |
| H(21) | 1246  | 415  | 6059 | 68    |
| H(22) | 2977  | 1351 | 5644 | 56    |
| H(24) | 114   | 2377 | 4427 | 73    |
| H(25) | -1621 | 1488 | 4862 | 89    |
| H(30) | 6668  | 5118 | 6060 | 62    |
| H(31) | 8531  | 5648 | 5467 | 65    |
| H(32) | 9019  | 4992 | 4514 | 68    |
| H(33) | 7639  | 3802 | 4146 | 59    |
| H(35) | 5244  | 2986 | 4191 | 44    |
| H(36) | 6017  | 2081 | 5360 | 40    |
| H(38) | 4992  | 111  | 4087 | 52    |

# 5. NMR Spectra

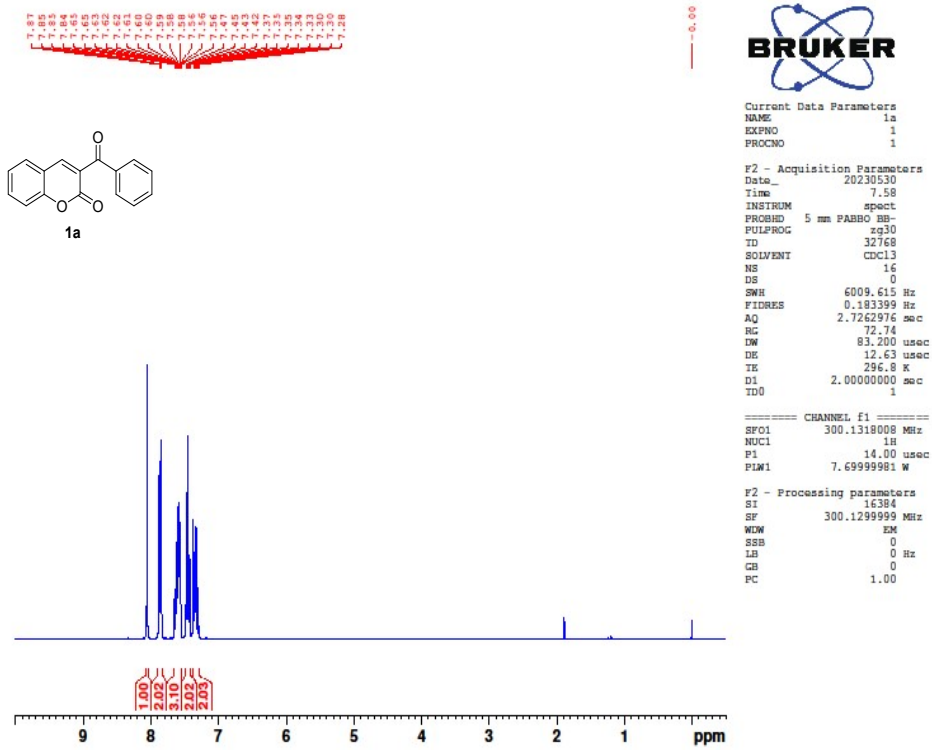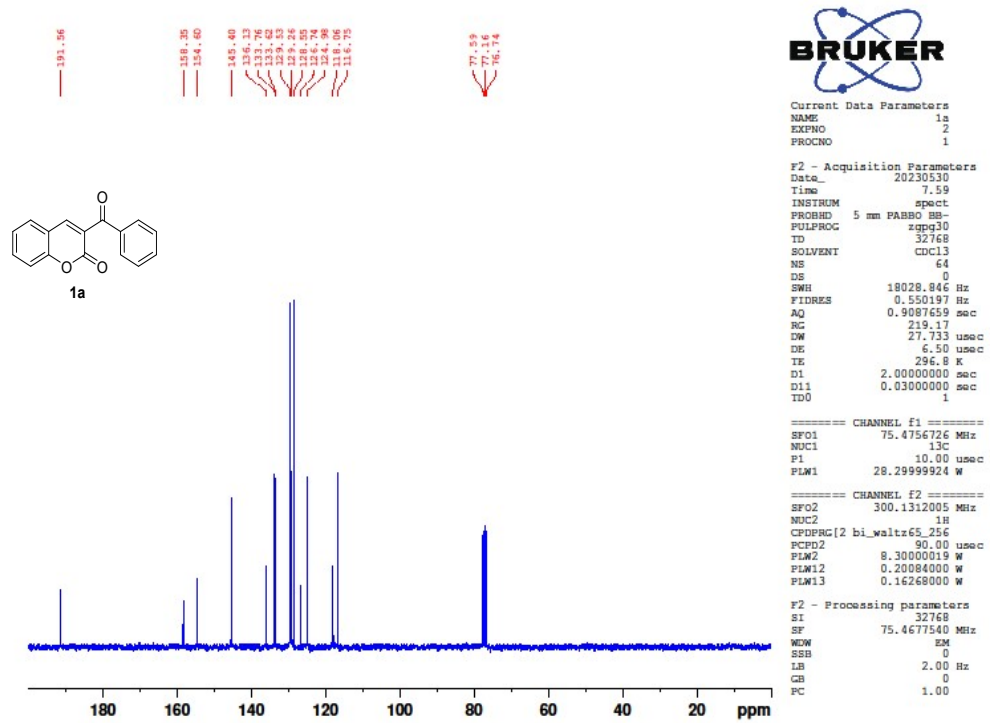

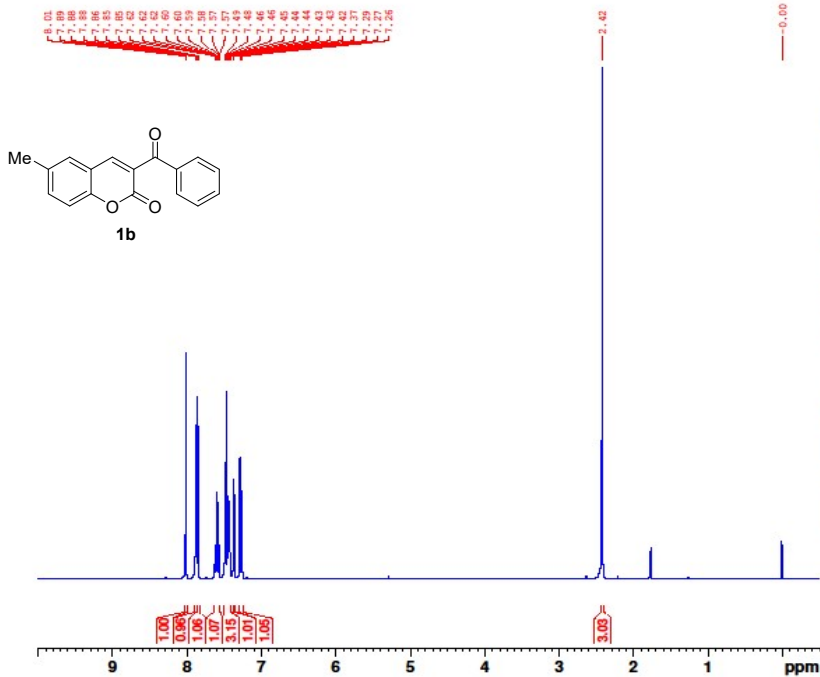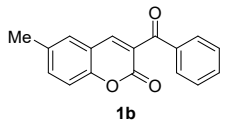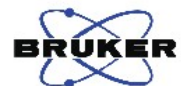

Current Data Parameters  
 NAME 1b  
 EXPNO 1  
 PROCNO 1

F2 - Acquisition Parameters  
 Date\_ 20230530  
 Time 8.59  
 INSTRUM spect  
 PROBHD 5 mm PABBO BB-  
 PULPROG zg30  
 TD 32768  
 ID 32768  
 SOLVENT CDCl3  
 NS 16  
 DS 0  
 SWH 6009.615 Hz  
 FIDRES 0.183399 Hz  
 AQ 2.7262976 sec  
 RG 131.54  
 DW 83.200 usec  
 DE 12.63 usec  
 TE 296.9 K  
 D1 2.00000000 sec  
 TDO 1

==== CHANNEL f1 =====  
 SFO1 300.1318008 MHz  
 NUC1 1H  
 P1 14.00 usec  
 PLW1 7.69999981 W

F2 - Processing parameters  
 SI 16384  
 SF 300.1300032 MHz  
 WDW EM  
 SSB 0  
 LB 0 Hz  
 GB 0  
 PC 1.00

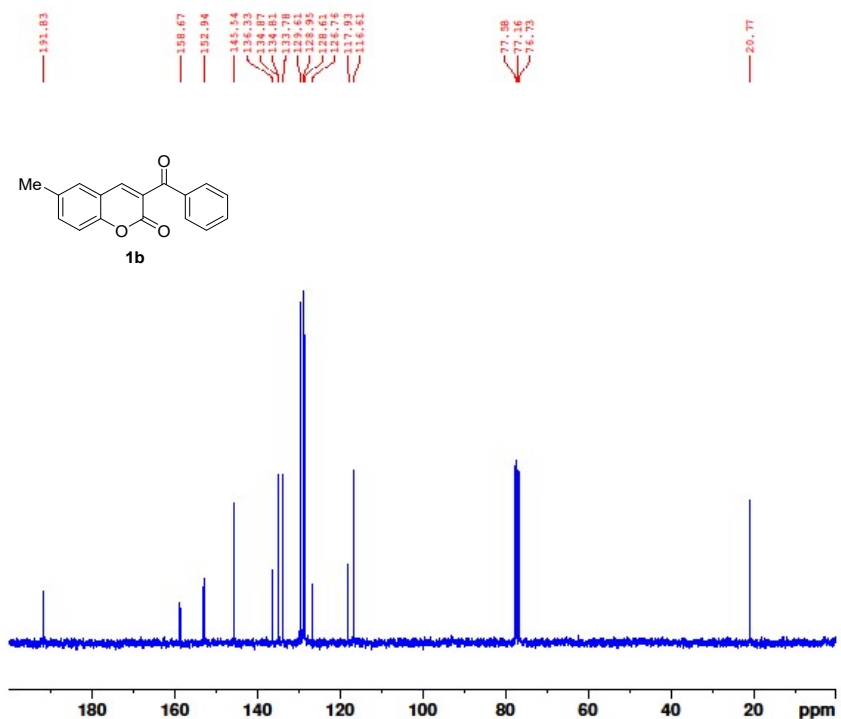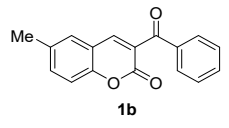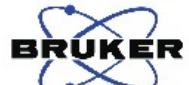

Current Data Parameters  
 NAME 1b  
 EXPNO 2  
 PROCNO 1

F2 - Acquisition Parameters  
 Date\_ 20230530  
 Time 9.00  
 INSTRUM spect  
 PROBHD 5 mm PABBO BB-  
 PULPROG zgpg30  
 TD 32768  
 ID 32768  
 SOLVENT CDCl3  
 NS 128  
 DS 0  
 SWH 18028.846 Hz  
 FIDRES 0.550197 Hz  
 AQ 0.9087659 sec  
 RG 219.17  
 DW 27.733 usec  
 DE 6.50 usec  
 TE 297.0 K  
 D1 2.00000000 sec  
 D11 0.03000000 sec  
 TDO 1

==== CHANNEL f1 =====  
 SFO1 75.4756726 MHz  
 NUC1 13C  
 P1 10.00 usec  
 PLW1 28.29999924 W

==== CHANNEL f2 =====  
 SFO2 300.1312005 MHz  
 NUC2 1H  
 CPDPRG [2 bi\_waltz65\_256  
 PCPD2 90.00 usec  
 PLW2 8.30000019 W  
 PLW12 0.20084000 W  
 PLW13 0.16268000 W

F2 - Processing parameters  
 SI 32768  
 SF 75.4677470 MHz  
 WDW EM  
 SSB 0  
 LB 2.00 Hz  
 GB 0  
 PC 1.00



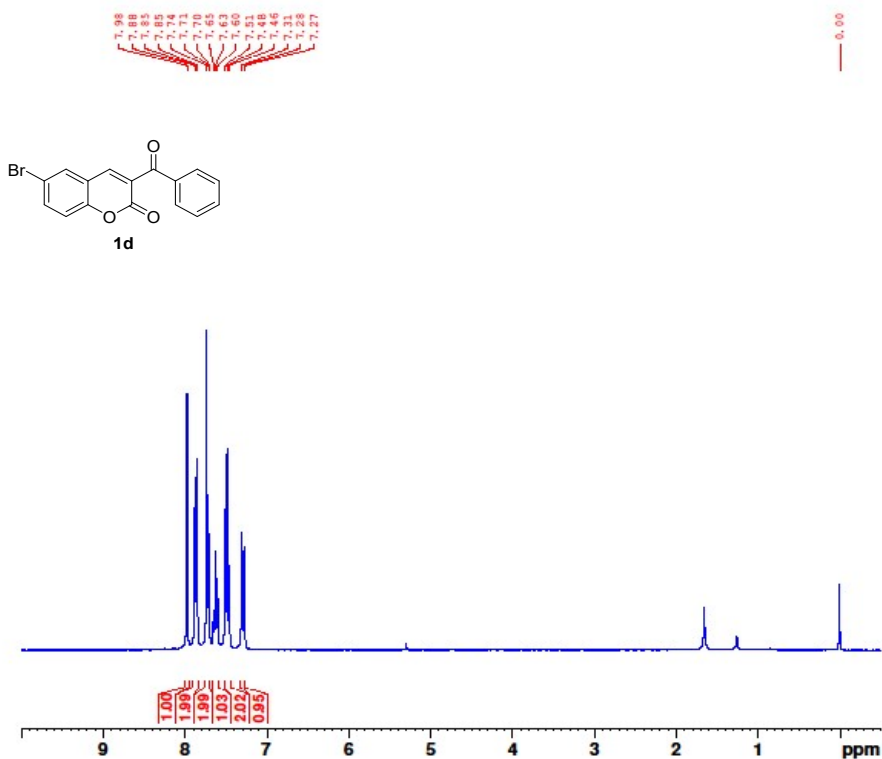

**BRUKER**

Current Data Parameters  
 NAME 1d  
 EXPNO 1  
 PROCNO 1

F2 - Acquisition Parameters  
 Date\_ 20230605  
 Time 20.53  
 INSTRUM spect  
 PROBHD 5 mm PABBO BB-  
 PULPROG zg30  
 TD 32768  
 SOLVENT CDCl3  
 NS 64  
 DS 0  
 SWH 6009.615 Hz  
 FIDRES 0.183399 Hz  
 AQ 2.7262976 sec  
 RG 219.17  
 DW 83.200 usec  
 DE 12.63 usec  
 TE 295.1 K  
 D1 2.0000000 sec  
 TD0 1

==== CHANNEL f1 =====  
 SFO1 300.1318008 MHz  
 NUC1 1H  
 P1 14.00 usec  
 PLW1 7.69999981 W

F2 - Processing parameters  
 SI 16384  
 SF 300.1300050 MHz  
 WCW EM  
 SSB 0  
 LB 0 Hz  
 GB 0  
 PC 1.00

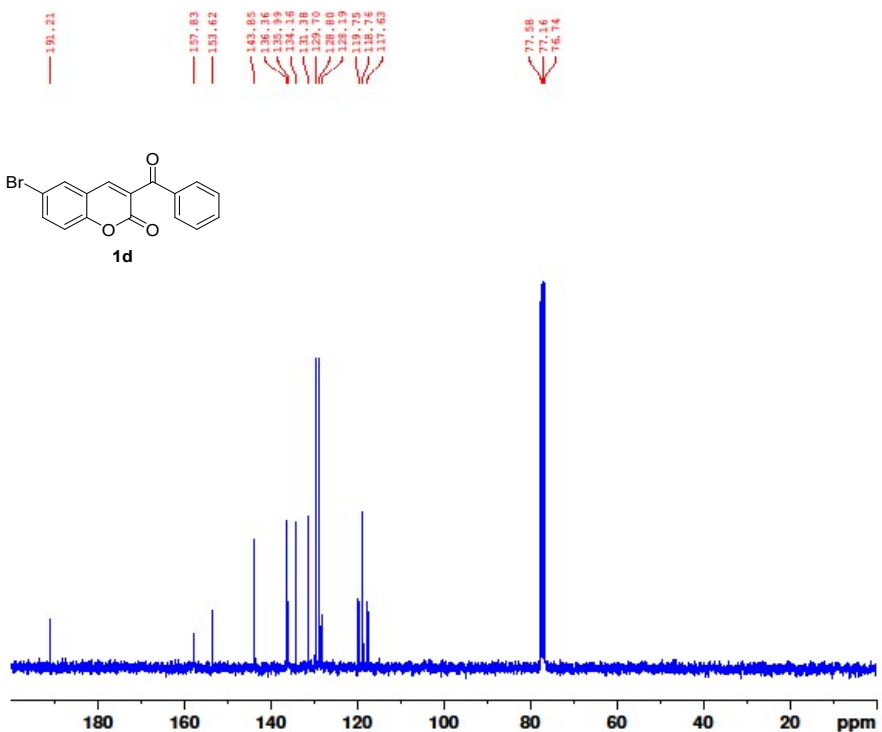

**BRUKER**

Current Data Parameters  
 NAME 1d  
 EXPNO 2  
 PROCNO 1

F2 - Acquisition Parameters  
 Date\_ 20230605  
 Time 21.07  
 INSTRUM spect  
 PROBHD 5 mm PABBO BB-  
 PULPROG zgpg30  
 TD 32768  
 SOLVENT CDCl3  
 NS 256  
 DS 0  
 SWH 18028.846 Hz  
 FIDRES 0.550197 Hz  
 AQ 0.9087659 sec  
 RG 219.17  
 DW 27.733 usec  
 DE 6.50 usec  
 TE 296.0 K  
 D1 2.0000000 sec  
 D11 0.0300000 sec  
 TD0 1

==== CHANNEL f1 =====  
 SFO1 75.4756726 MHz  
 NUC1 13C  
 P1 10.00 usec  
 PLW1 28.29999924 W

==== CHANNEL f2 =====  
 SFO2 300.1312005 MHz  
 NUC2 1H  
 CPDPRG2 bi\_waltz65\_256  
 PCPD2 90.00 usec  
 PLW2 8.30000019 W  
 PLW12 0.20084000 W  
 PLW13 0.16268000 W

F2 - Processing parameters  
 SI 32768  
 SF 75.4677419 MHz  
 WCW EM  
 SSB 0  
 LB 2.00 Hz  
 GB 0  
 PC 1.00

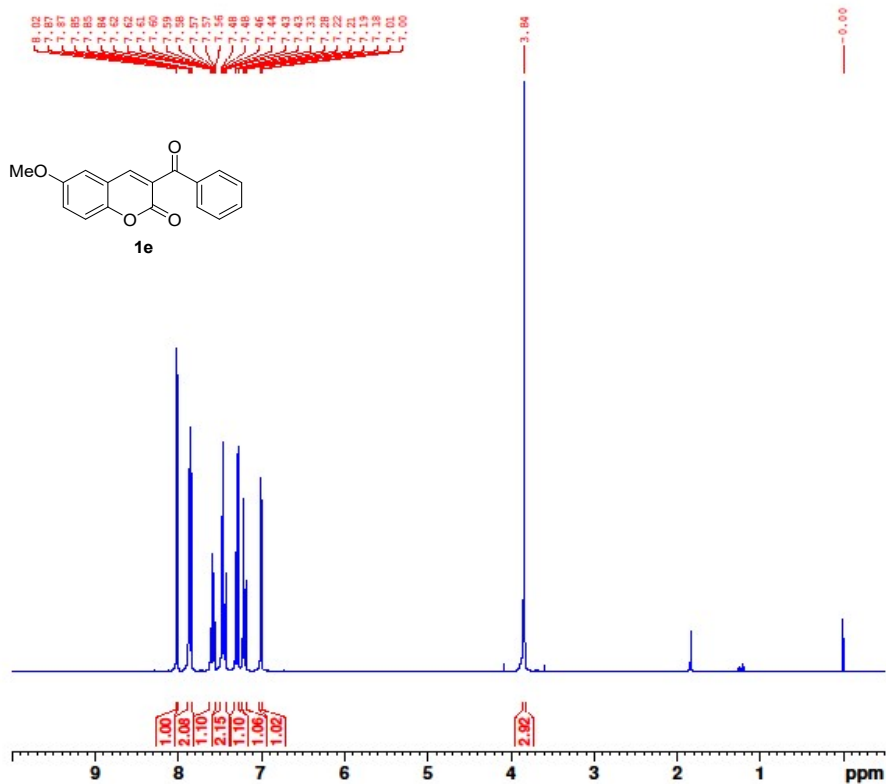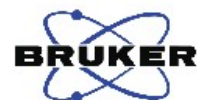

Current Data Parameters  
 NAME 1e  
 EXPNO 1  
 PROCNO 1

F2 - Acquisition Parameters  
 Date\_ 20230530  
 Time 6.58  
 INSTRUM spect  
 PROBHD 5 mm PABBO BB-  
 PULPROG zg30  
 ID 32768  
 SOLVENT CDCl3  
 NS 16  
 DS 0  
 SWH 6009.615 Hz  
 FIDRES 0.183399 Hz  
 AQ 2.7262976 sec  
 RC 106.61  
 DW 83.200 usec  
 DE 12.63 usec  
 TE 296.6 K  
 D1 2.0000000 sec  
 TD0 1

==== CHANNEL f1 =====  
 SFO1 300.1318008 MHz  
 NUC1 1H  
 P1 14.00 usec  
 PLW1 7.69999981 W

F2 - Processing parameters  
 SI 16384  
 SF 300.1300008 MHz  
 WDW EM  
 SSB 0  
 LB 0 Hz  
 GB 0  
 PC 1.00

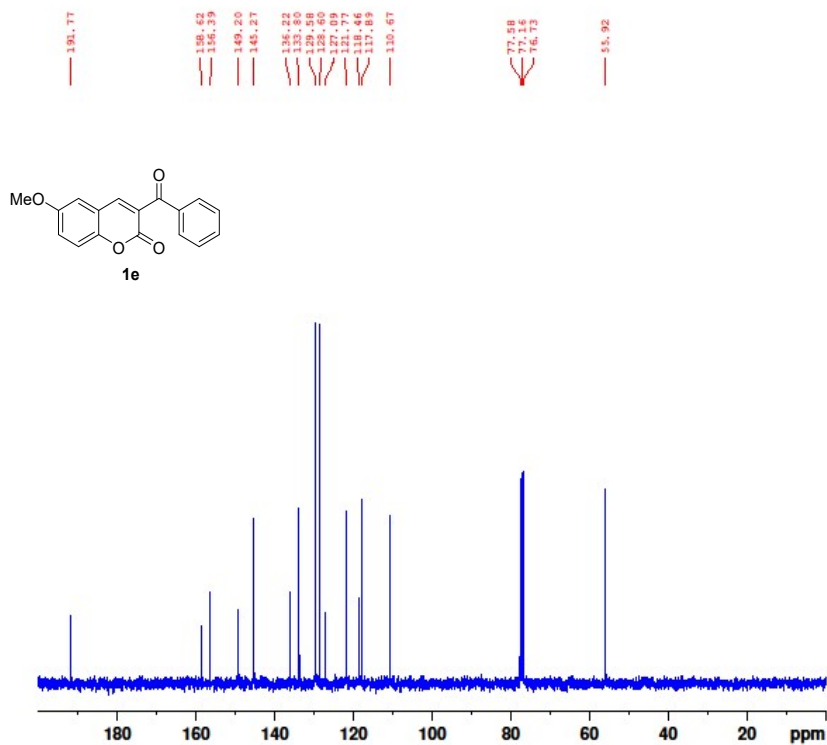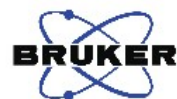

Current Data Parameters  
 NAME 1e  
 EXPNO 2  
 PROCNO 1

F2 - Acquisition Parameters  
 Date\_ 20230530  
 Time 7.01  
 INSTRUM spect  
 PROBHD 5 mm PABBO BB-  
 PULPROG zgpg30  
 TD 32768  
 SOLVENT CDCl3  
 NS 512  
 DS 0  
 SWH 18028.846 Hz  
 FIDRES 0.550197 Hz  
 AQ 0.9087659 sec  
 RG 219.17  
 DW 27.733 usec  
 DE 6.50 usec  
 TE 296.8 K  
 D1 2.0000000 sec  
 D11 0.03000000 sec  
 TD0 1

==== CHANNEL f1 =====  
 SFO1 75.4756726 MHz  
 NUC1 13C  
 P1 10.00 usec  
 PLW1 28.29999924 W

==== CHANNEL f2 =====  
 SFO2 300.1312005 MHz  
 NUC2 1H  
 CPDPRG2 bi\_waltz65\_256  
 PCPD2 90.00 usec  
 PLW2 8.30000019 W  
 PLW12 0.20084000 W  
 PLW13 0.16268000 W

F2 - Processing parameters  
 SI 32768  
 SF 75.4677491 MHz  
 WDW EM  
 SSB 0  
 LB 2.00 Hz  
 GB 0  
 PC 1.00

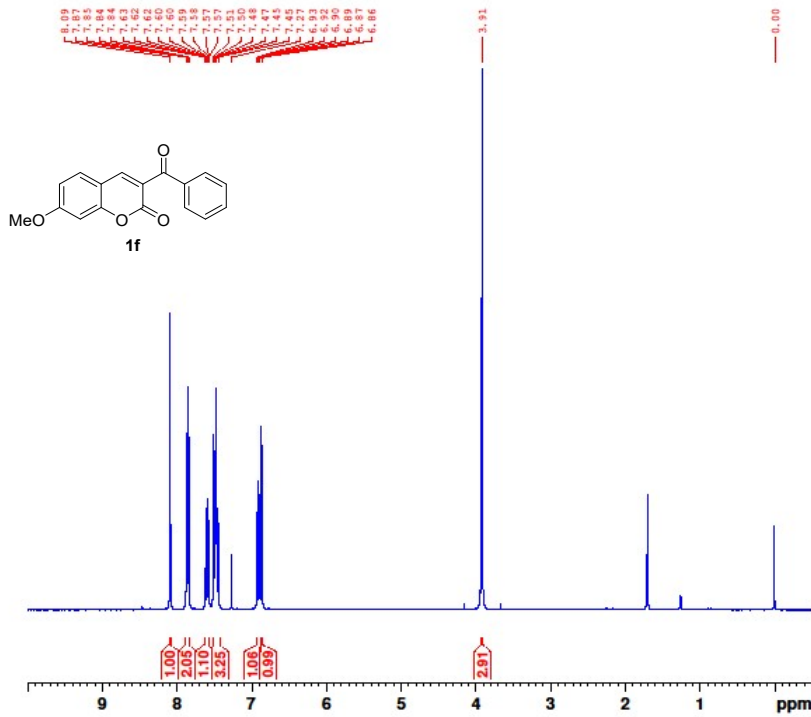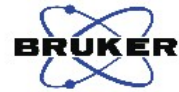

Current Data Parameters  
 NAME 1f  
 EXPNO 1  
 PROCNO 1

F2 - Acquisition Parameters  
 Date\_ 20230604  
 Time 15.14  
 INSTRUM spect  
 PROBHD 5 mm PABBO BB-  
 PULPROG zg30  
 TD 32768  
 SOLVENT cdcl3  
 NS 64  
 DS 0  
 SWH 6009.615 Hz  
 FIDRES 0.183399 Hz  
 AQ 2.7262976 sec  
 RG 219.17  
 DW 83.200 usec  
 DE 12.63 usec  
 TE 295.5 K  
 D1 2.0000000 sec  
 TD0 1

==== CHANNEL f1 =====  
 SFO1 300.1318008 MHz  
 NUC1 1H  
 P1 14.00 usec  
 PLW1 7.69999981 W

F2 - Processing parameters  
 SI 16384  
 SF 300.1300042 MHz  
 WDW EM  
 SSB 0  
 LB 0 Hz  
 GB 0  
 PC 1.00

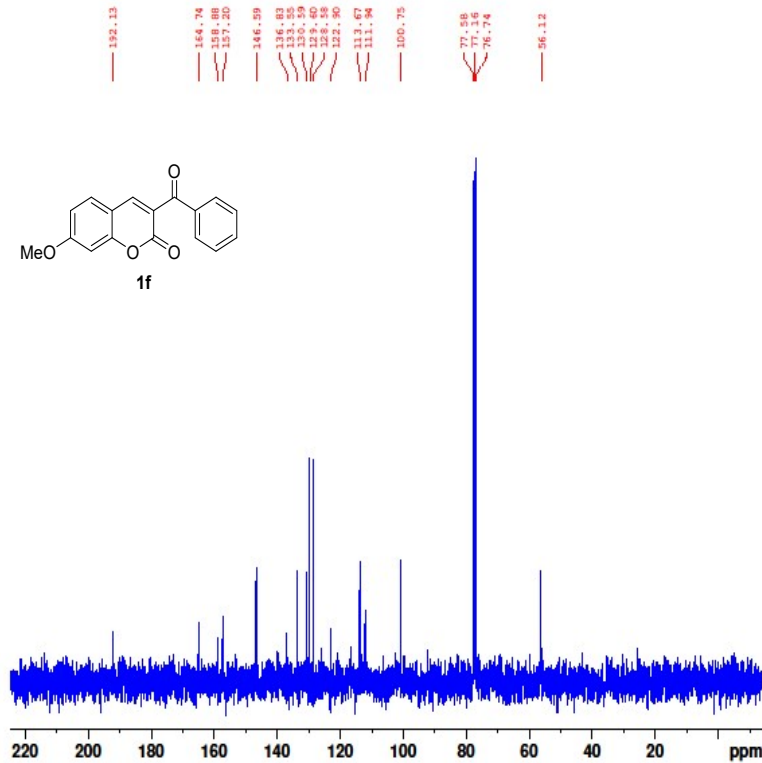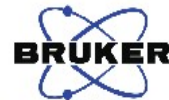

Current Data Parameters  
 NAME 1f  
 EXPNO 2  
 PROCNO 1

F2 - Acquisition Parameters  
 Date\_ 20230604  
 Time 15.15  
 INSTRUM spect  
 PROBHD 5 mm PABBO BB-  
 PULPROG zgpg30  
 TD 32768  
 SOLVENT cdcl3  
 NS 500  
 DS 0  
 SWH 18028.846 Hz  
 FIDRES 0.550197 Hz  
 AQ 0.9087659 sec  
 RG 219.17  
 DW 27.733 usec  
 DE 6.50 usec  
 TE 295.6 K  
 D1 2.0000000 sec  
 D11 0.0300000 sec  
 TD0 1

==== CHANNEL f1 =====  
 SFO1 75.4756726 MHz  
 NUC1 13C  
 P1 10.00 usec  
 PLW1 28.29999924 W

==== CHANNEL f2 =====  
 SFO2 300.1312005 MHz  
 NUC2 1H  
 CPOPRG[2] bi\_waltz65\_256  
 PCPD2 90.00 usec  
 P1W2 8.30000019 W  
 P1W12 0.20084000 W  
 P1W13 0.16268000 W

F2 - Processing parameters  
 SI 32768  
 SF 75.4677428 MHz  
 WDW EM  
 SSB 0  
 LB 2.00 Hz  
 GB 0  
 PC 1.00

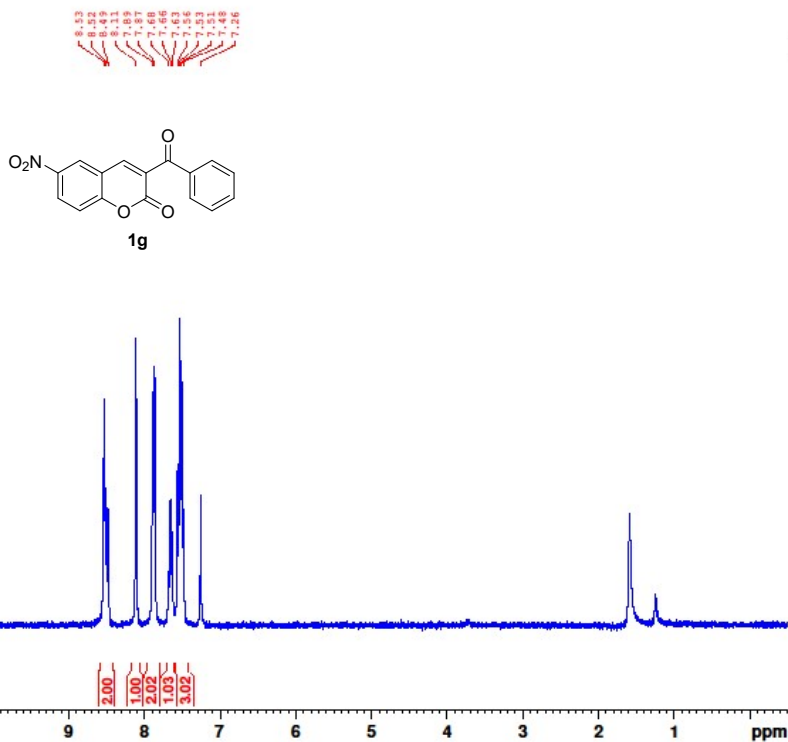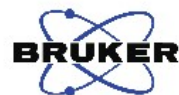

Current Data Parameters  
 NAME 1g  
 EXPNO 1  
 PROCNO 1

F2 - Acquisition Parameters  
 Date\_ 20230411  
 Time 11.35  
 INSTRUM spect  
 PROBHD 5 mm FAPBO BB-  
 PULPROG zg30  
 TD 32768  
 SOLVENT CDCl3  
 NS 64  
 DS 0  
 SWH 6009.615 Hz  
 FIDRES 0.183399 Hz  
 AQ 2.7262976 sec  
 RG 219.17  
 DW 83.200 usec  
 DE 12.63 usec  
 TE 295.5 K  
 D1 2.0000000 sec  
 TD0 1

==== CHANNEL f1 =====  
 SFO1 300.1318008 MHz  
 NUC1 1H  
 P1 14.00 usec  
 PLW1 7.69999981 W

F2 - Processing parameters  
 SI 16384  
 SF 300.1300079 MHz  
 WDW EM  
 SSB 0  
 LB 0 Hz  
 GB 0  
 PC 1.00

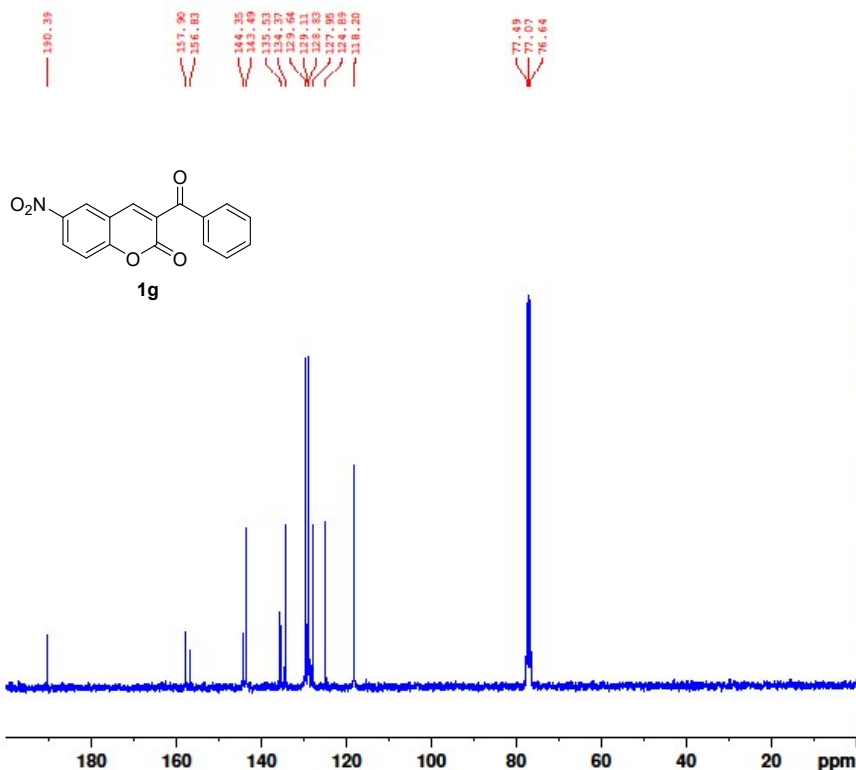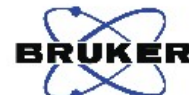

Current Data Parameters  
 NAME 1g  
 EXPNO 2  
 PROCNO 1

F2 - Acquisition Parameters  
 Date\_ 20240427  
 Time 19.18  
 INSTRUM spect  
 PROBHD 5 mm FAPBO BB-  
 PULPROG zgpg30  
 ID 32768  
 SOLVENT CDCl3  
 NS 1652  
 DS 0  
 SWH 18028.846 Hz  
 FIDRES 0.550197 Hz  
 AQ 0.9087659 sec  
 RG 219.17  
 DW 27.733 usec  
 DE 6.50 usec  
 TE 297.7 K  
 D1 2.0000000 sec  
 D11 0.0300000 sec  
 TD0 1

==== CHANNEL f1 =====  
 SFO1 75.4756726 MHz  
 NUC1 13C  
 P1 10.00 usec  
 PLW1 28.29999924 W

==== CHANNEL f2 =====  
 SFO2 300.1312005 MHz  
 NUC2 1H  
 CDPFRG[2 bi\_waltz65\_256  
 PCPD2 90.00 usec  
 PLW2 8.30000019 W  
 PLW12 0.20084000 W  
 PLW13 0.16268000 W

F2 - Processing parameters  
 SI 32768  
 SF 75.4677485 MHz  
 WDW EM  
 SSB 0  
 LB 2.00 Hz  
 GB 0  
 PC 1.00



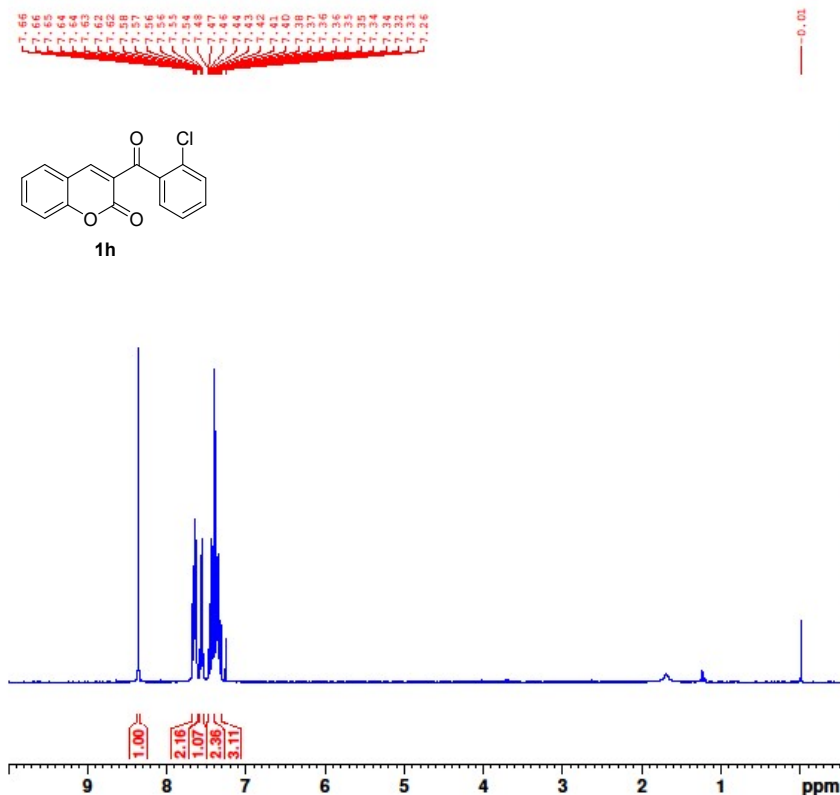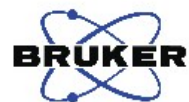

Current Data Parameters

```

NAME      1h
EXPNO    2
PROCNO   1

F2 - Acquisition Parameters
Date_    20240204
Time     21.02
INSTRUM  spect
PROBHD   5 mm F4BBO BB-
PULPROG  zgpg30
TD       32768
SOLVENT  CDCl3
NS       1972
DS       0
SWH      18028.846 Hz
FIDRES   0.550197 Hz
AQ       0.9087659 sec
RG       219.17
DW       27.733 usec
DE       6.50 usec
TE       297.2 K
D1       2.00000000 sec
D11      0.03000000 sec
TD0      1

===== CHANNEL f1 =====
SF01    75.4756726 MHz
NUC1     13C
P1       10.00 usec
PLW1    28.29999924 W

===== CHANNEL f2 =====
SF02    300.1312005 MHz
NUC2     1H
PCPD2   2 bi_waltz65_256
PCPD2   90.00 usec
PLW2    8.30000019 W
PLW12   0.20084000 W
PLW13   0.16268000 W

F2 - Processing parameters
SI       32768
SF       75.4677485 MHz
WDW      EM
SSB      0
LB       2.00 Hz
GB       0
PC       1.00

```

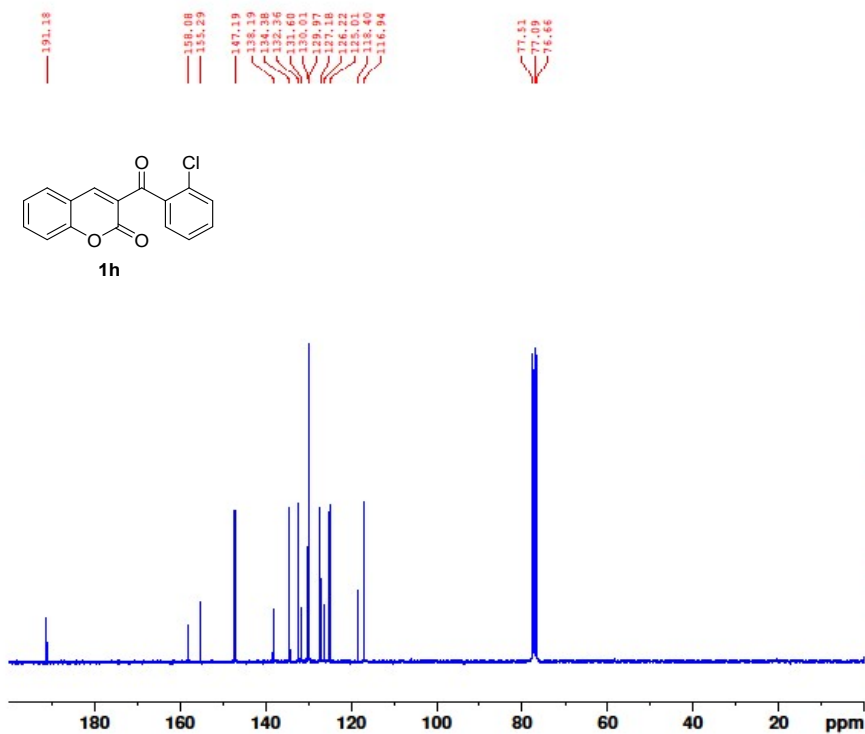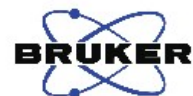

Current Data Parameters

```

NAME      1h
EXPNO    2
PROCNO   1

F2 - Acquisition Parameters
Date_    20240204
Time     21.02
INSTRUM  spect
PROBHD   5 mm F4BBO BB-
PULPROG  zgpg30
TD       32768
SOLVENT  CDCl3
NS       1972
DS       0
SWH      18028.846 Hz
FIDRES   0.550197 Hz
AQ       0.9087659 sec
RG       219.17
DW       27.733 usec
DE       6.50 usec
TE       297.2 K
D1       2.00000000 sec
D11      0.03000000 sec
TD0      1

===== CHANNEL f1 =====
SF01    75.4756726 MHz
NUC1     13C
P1       10.00 usec
PLW1    28.29999924 W

===== CHANNEL f2 =====
SF02    300.1312005 MHz
NUC2     1H
PCPD2   2 bi_waltz65_256
PCPD2   90.00 usec
PLW2    8.30000019 W
PLW12   0.20084000 W
PLW13   0.16268000 W

F2 - Processing parameters
SI       32768
SF       75.4677485 MHz
WDW      EM
SSB      0
LB       2.00 Hz
GB       0
PC       1.00

```



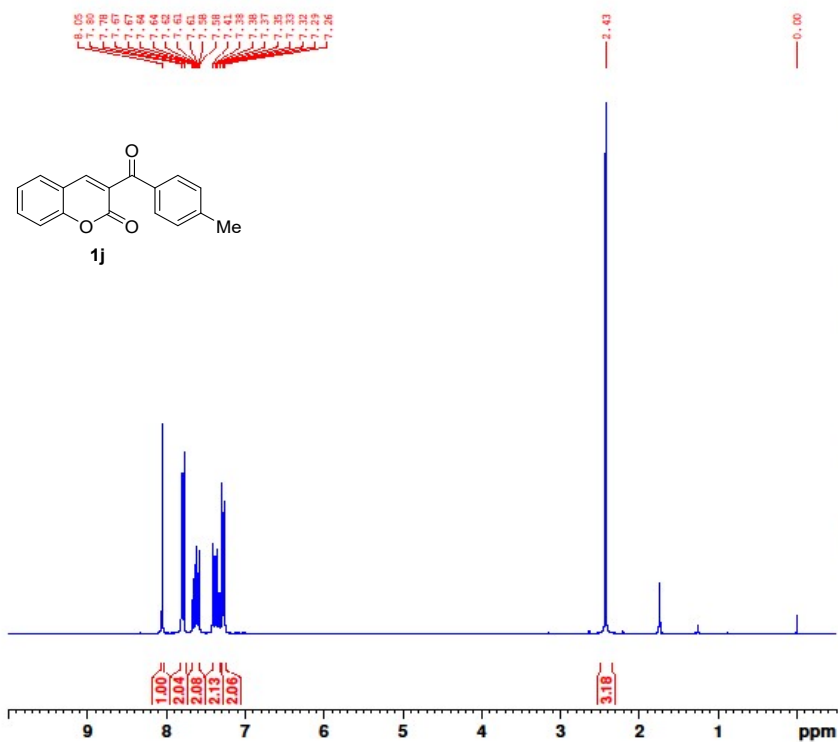

**BRUKER**

Current Data Parameters  
 NAME 1j  
 EXPNO 1  
 PROCNO 1

F2 - Acquisition Parameters  
 Date\_ 20240211  
 Time 17.08  
 INSTRUM spect  
 PROBHD 5 mm PABBO BB-  
 PULPROG zg30  
 TD 32768  
 SOLVENT CDCl3  
 NS 64  
 DS 0  
 SWH 6009.615 Hz  
 FIDRES 0.183399 Hz  
 AQ 2.7262976 sec  
 RG 194.81  
 DW 83.200 usec  
 DE 12.63 usec  
 TE 292.1 K  
 D1 2.00000000 sec  
 TD0 1

==== CHANNEL f1 =====  
 SFO1 300.1318008 MHz  
 NUC1 1H  
 P1 14.00 usec  
 PLW1 7.69999981 W

F2 - Processing parameters  
 SI 16384  
 SF 300.1300040 MHz  
 WDW EM  
 SSB 0  
 LB 0 Hz  
 GB 0  
 PC 1.00

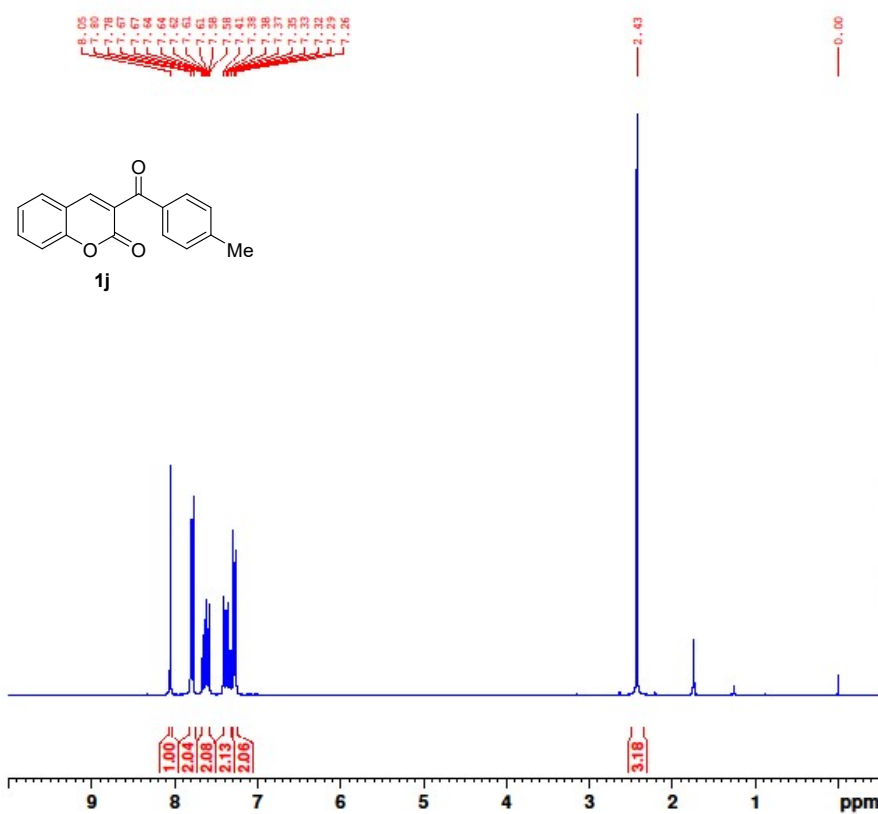

**BRUKER**

Current Data Parameters  
 NAME 1j  
 EXPNO 1  
 PROCNO 1

F2 - Acquisition Parameters  
 Date\_ 20240211  
 Time 17.08  
 INSTRUM spect  
 PROBHD 5 mm PABBO BB-  
 PULPROG zg30  
 TD 32768  
 SOLVENT CDCl3  
 NS 64  
 DS 0  
 SWH 6009.615 Hz  
 FIDRES 0.183399 Hz  
 AQ 2.7262976 sec  
 RG 194.81  
 DW 83.200 usec  
 DE 12.63 usec  
 TE 292.1 K  
 D1 2.00000000 sec  
 TD0 1

==== CHANNEL f1 =====  
 SFO1 300.1318008 MHz  
 NUC1 1H  
 P1 14.00 usec  
 PLW1 7.69999981 W

F2 - Processing parameters  
 SI 16384  
 SF 300.1300040 MHz  
 WDW EM  
 SSB 0  
 LB 0 Hz  
 GB 0  
 PC 1.00

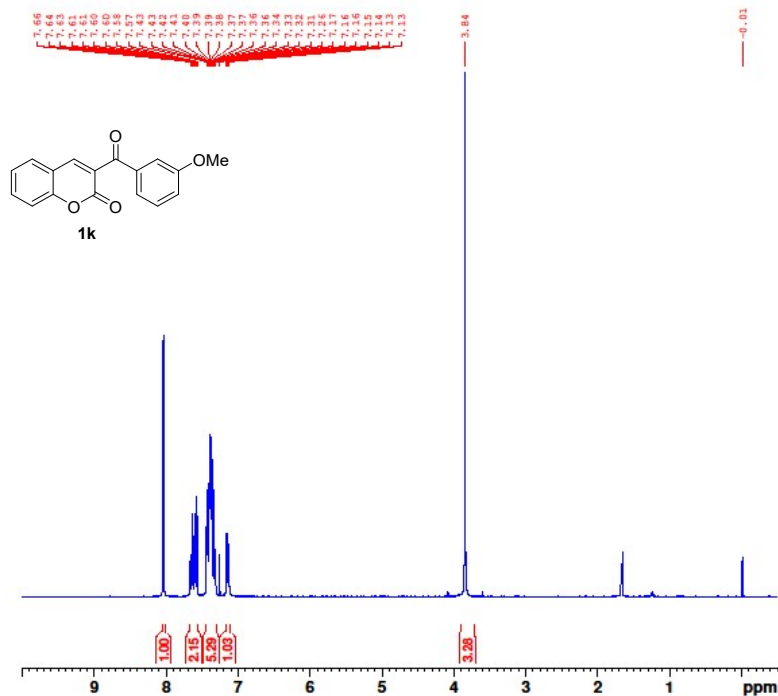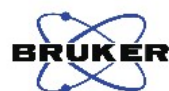

Current Data Parameters  
 NAME 1k  
 EXPNO 1  
 PROCNO 1

F2 - Acquisition Parameters  
 Date\_ 20240114  
 Time 19.11  
 INSTRUM spect  
 PROBHD 5 mm PABBO BB-  
 PULPROG zg30  
 TD 32768  
 SOLVENT CDCl3  
 NS 64  
 DS 0  
 SWH 6009.615 Hz  
 FIDRES 0.183399 Hz  
 AQ 2.7262976 sec  
 RG 219.17  
 DW 83.200 usec  
 DE 12.63 usec  
 TE 297.2 K  
 D1 2.0000000 sec  
 TDO 1

==== CHANNEL f1 =====  
 SFO1 300.1318008 MHz  
 NUC1 1H  
 P1 14.00 usec  
 PLW1 7.6999981 W

F2 - Processing parameters  
 SI 16384  
 SF 300.1300079 MHz  
 WDW EM  
 SSB 0  
 LB 0 Hz  
 GB 0  
 PC 1.00

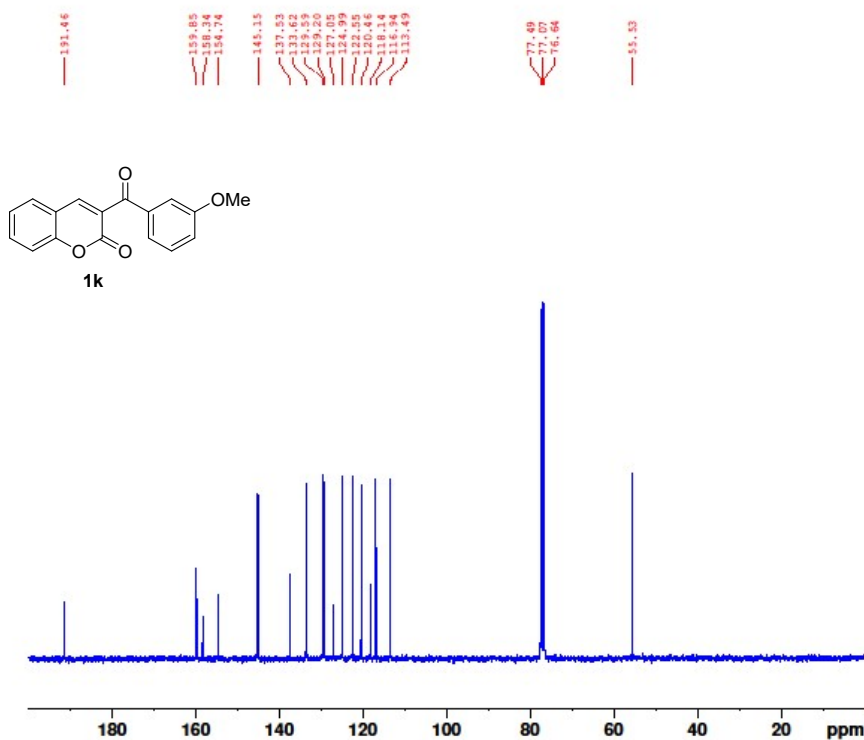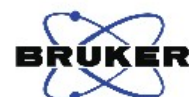

Current Data Parameters  
 NAME 1k  
 EXPNO 2  
 PROCNO 1

F2 - Acquisition Parameters  
 Date\_ 20240114  
 Time 20.19  
 INSTRUM spect  
 PROBHD 5 mm PABBO BB-  
 PULPROG zgpg30  
 TD 32768  
 SOLVENT CDCl3  
 NS 1338  
 DS 0  
 SWH 18028.846 Hz  
 FIDRES 0.550197 Hz  
 AQ 0.9087659 sec  
 RG 219.17  
 DW 27.733 usec  
 DE 6.50 usec  
 TE 298.3 K  
 D1 2.0000000 sec  
 D11 0.0300000 sec  
 TDO 1

==== CHANNEL f1 =====  
 SFO1 75.4756726 MHz  
 NUC1 13C  
 P1 10.00 usec  
 PLW1 28.29999924 W

==== CHANNEL f2 =====  
 SFO2 300.1312005 MHz  
 NUC2 1H  
 CPDPRG[2] bi\_waltz65\_256  
 PCPD2 90.00 usec  
 PLW2 8.30000019 W  
 PLW12 0.20084000 W  
 PLW13 0.16268000 W

F2 - Processing parameters  
 SI 32768  
 SF 75.4677485 MHz  
 WDW EM  
 SSB 0  
 LB 2.00 Hz  
 GB 0  
 PC 1.00

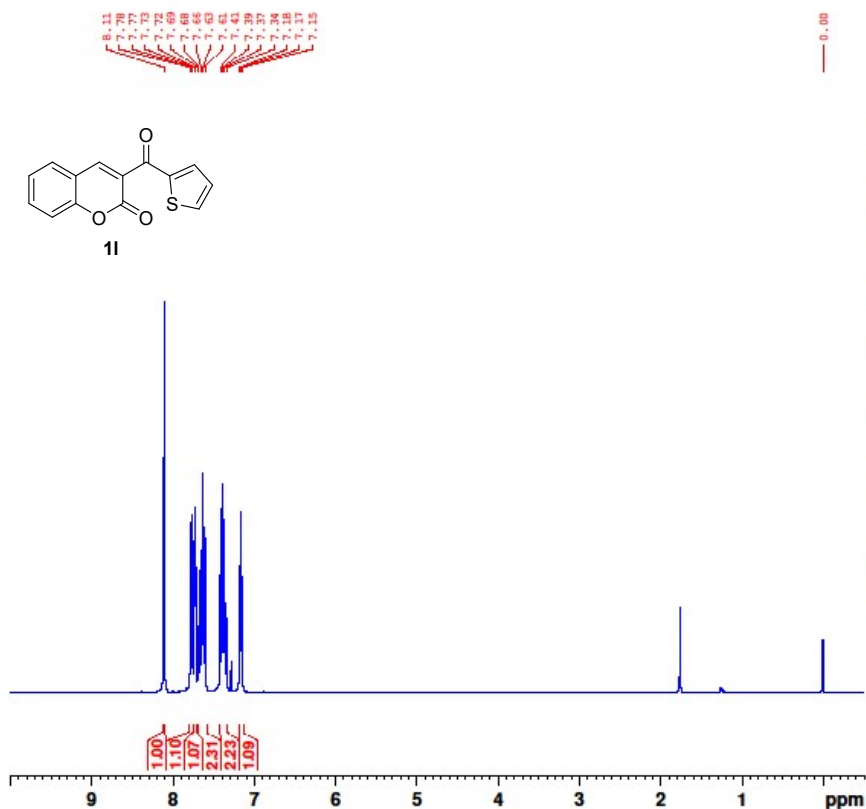

0.00

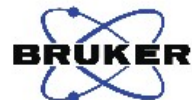

Current Data Parameters  
 NAME 11  
 EXPNO 1  
 PROCNO 1

F2 - Acquisition Parameters  
 Date\_ 20240301  
 Time 14.25  
 INSTRUM spect  
 PROBHD 5 mm PABBO BB-  
 PULPROG zg30  
 TD 32768  
 SOLVENT CDCl3  
 NS 16  
 DS 0  
 SWH 6009.615 Hz  
 FIDRES 0.183399 Hz  
 AQ 2.7262976 sec  
 RG 194.81  
 DW 83.200 usec  
 DE 12.63 usec  
 TE 292.9 K  
 D1 2.00000000 sec  
 TD0 1

==== CHANNEL f1 =====  
 SFO1 300.1318008 MHz  
 NUC1 1H  
 P1 14.00 usec  
 PLW1 7.69999981 W

F2 - Processing parameters  
 SI 16384  
 SF 300.1300000 MHz  
 WDW EM  
 SSB 0  
 LB 0 Hz  
 GB 0  
 PC 1.00

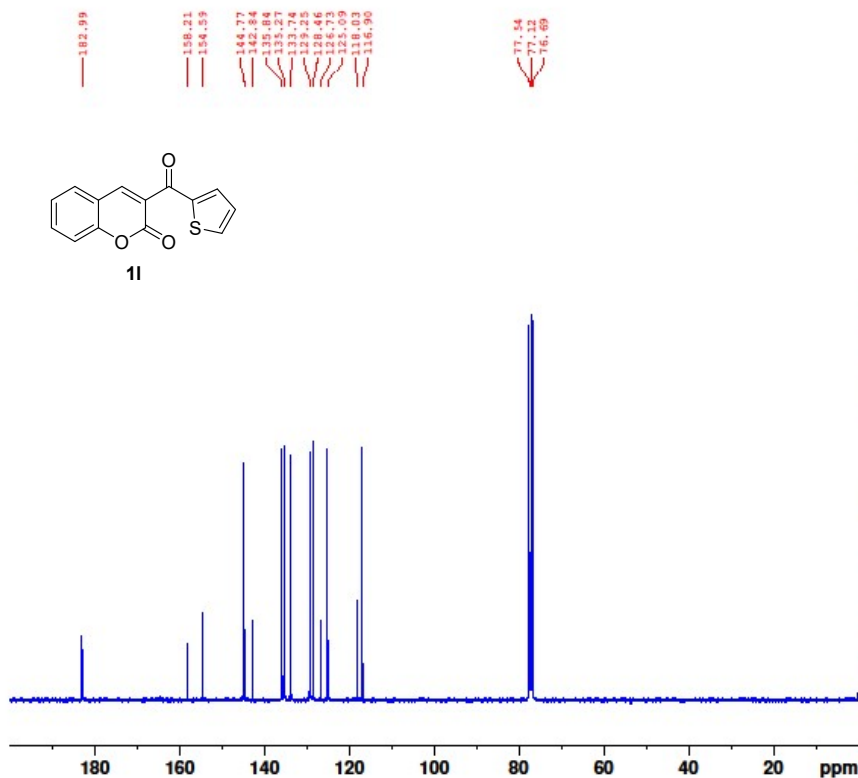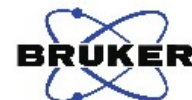

Current Data Parameters  
 NAME 11  
 EXPNO 2  
 PROCNO 1

F2 - Acquisition Parameters  
 Date\_ 20240301  
 Time 16.00  
 INSTRUM spect  
 PROBHD 5 mm PABBO BB-  
 PULPROG zgpg30  
 TD 32768  
 SOLVENT CDCl3  
 NS 1898  
 DS 0  
 SWH 18028.846 Hz  
 FIDRES 0.550197 Hz  
 AQ 0.9087659 sec  
 RG 219.17  
 DW 27.733 usec  
 DE 6.50 usec  
 TE 294.0 K  
 D1 2.00000000 sec  
 D11 0.03000000 sec  
 TD0 1

==== CHANNEL f1 =====  
 SFO1 75.4756726 MHz  
 NUC1 13C  
 P1 10.00 usec  
 PLW1 28.29999924 W

==== CHANNEL f2 =====  
 SFO2 300.1312005 MHz  
 NUC2 1H  
 CPDPRG2 bi\_waltz65\_256  
 PCPD2 90.00 usec  
 PLW2 8.30000019 W  
 PLW12 0.20084000 W  
 PLW13 0.16268000 W

F2 - Processing parameters  
 SI 32768  
 SF 75.4677485 MHz  
 WDW EM  
 SSB 0  
 LB 2.00 Hz  
 GB 0  
 PC 1.00

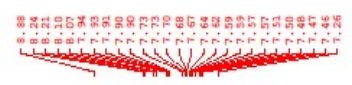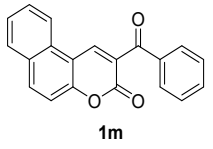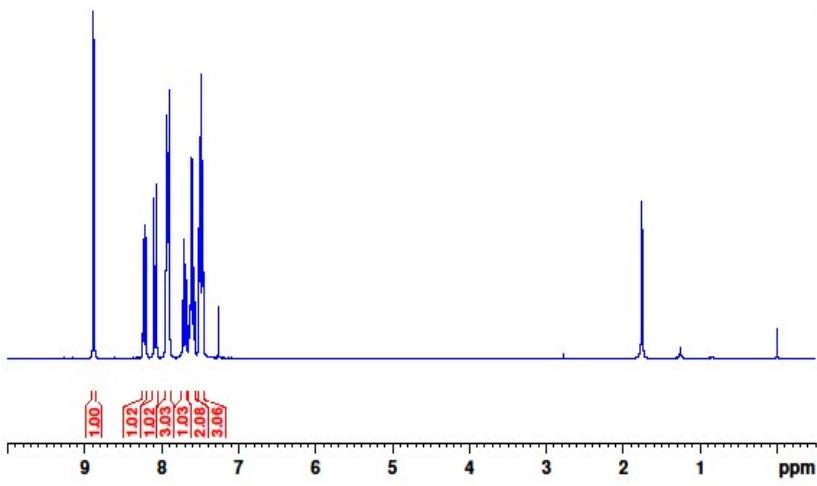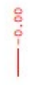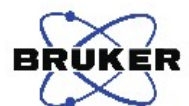

Current Data Parameters  
 NAME 1m  
 EXPNO 1  
 PROCNO 1

F2 - Acquisition Parameters  
 Date\_ 20230530  
 Time 8.26  
 INSTRUM spect  
 PROBHD 5 mm PABBO BB-  
 PULPROG zgpg30  
 TD 32768  
 SOLVENT CDCl3  
 NS 16  
 DS 0  
 SWH 6009.615 Hz  
 FIDRES 0.183399 Hz  
 AQ 2.7262976 sec  
 RG 194.81  
 DW 83.200 usec  
 DE 12.63 usec  
 TE 296.9 K  
 D1 2.00000000 sec  
 TDO 1

==== CHANNEL f1 =====  
 SFO1 300.1318008 MHz  
 NUC1 1H  
 P1 14.00 usec  
 PLW1 7.69999981 W

F2 - Processing parameters  
 SI 16384  
 SF 300.1300065 MHz  
 MW 5M  
 SSB 0  
 LB 0 Hz  
 GB 0  
 PC 1.00

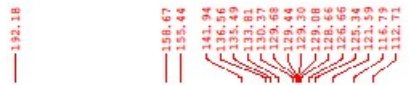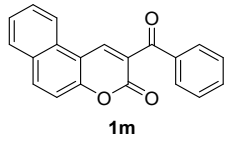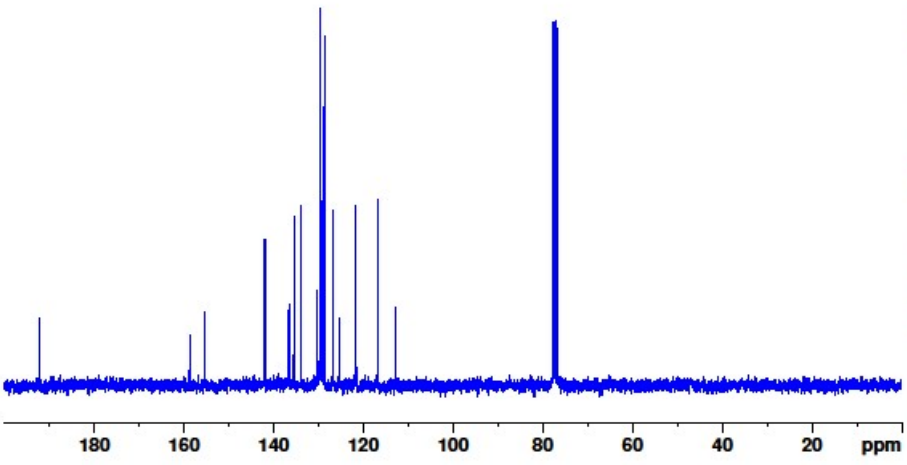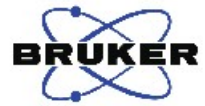

Current Data Parameters  
 NAME 1m  
 EXPNO 2  
 PROCNO 1

F2 - Acquisition Parameters  
 Date\_ 20230530  
 Time 8.27  
 INSTRUM spect  
 PROBHD 5 mm PABBO BB-  
 PULPROG zgpg30  
 TD 32768  
 SOLVENT CDCl3  
 NS 128  
 DS 0  
 SWH 18028.846 Hz  
 FIDRES 0.550197 Hz  
 AQ 0.9087659 sec  
 RG 219.17  
 DW 27.733 usec  
 DE 6.50 usec  
 TE 296.9 K  
 D1 2.00000000 sec  
 D11 0.03000000 sec  
 TDO 1

==== CHANNEL f1 =====  
 SFO1 75.4756726 MHz  
 NUC1 13C  
 P1 10.00 usec  
 PLW1 28.29999924 W

==== CHANNEL f2 =====  
 SFO2 300.1312005 MHz  
 NUC2 1H  
 CPDPRG[2 bi\_waltz65.256  
 PCPD2 90.00 usec  
 PLW2 8.30000019 W  
 PLW12 0.20084000 W  
 PLW13 0.16268000 W

F2 - Processing parameters  
 SI 32768  
 SF 75.4677442 MHz  
 MW 5M  
 SSB 0  
 LB 2.00 Hz  
 GB 0  
 PC 1.00







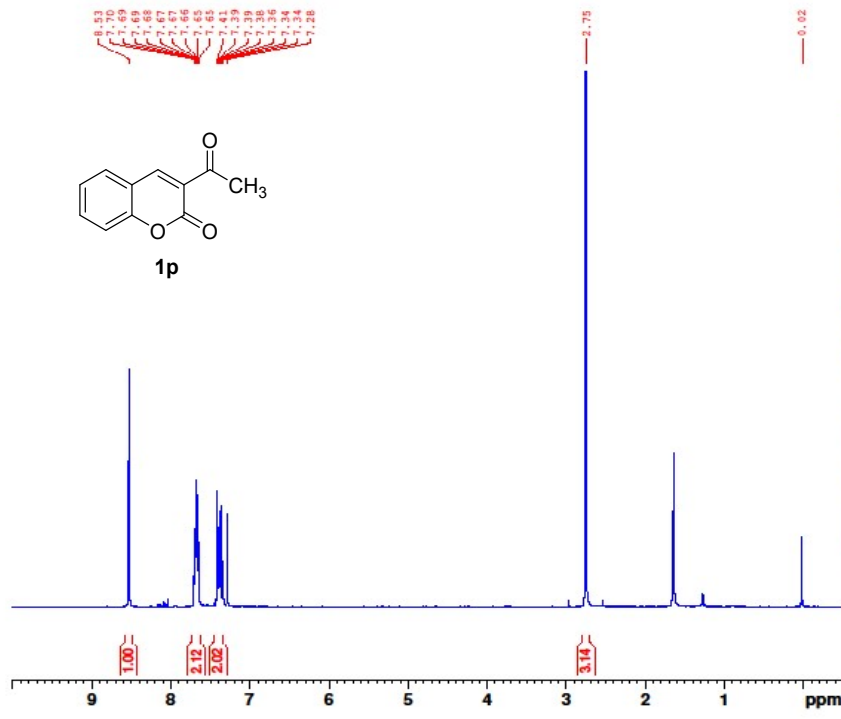

**BRUKER**

Current Data Parameters  
 NAME 240809-1A-1P  
 EXPNO 1  
 PROCNO 1

F2 - Acquisition Parameters  
 Date\_ 20240809  
 Time 18.26  
 INSTRUM spect  
 PROBHD 5 mm PABBO BB-  
 PULPROG zg30  
 TD 32768  
 SOLVENT CDCl3  
 NS 64  
 DS 0  
 SWH 6009.615 Hz  
 FIDRES 0.183399 Hz  
 AQ 2.7262976 sec  
 RG 219.17  
 DW 83.200 usec  
 DE 12.63 usec  
 TE 297.8 K  
 D1 2.0000000 sec  
 TDO 1

==== CHANNEL f1 =====  
 SFO1 300.1318008 MHz  
 NUC1 1H  
 P1 14.00 usec  
 PLW1 7.69999981 W

F2 - Processing parameters  
 SI 16384  
 SF 300.1300000 MHz  
 MW EM  
 SSB 0  
 LB 0 Hz  
 GB 0  
 PC 1.00

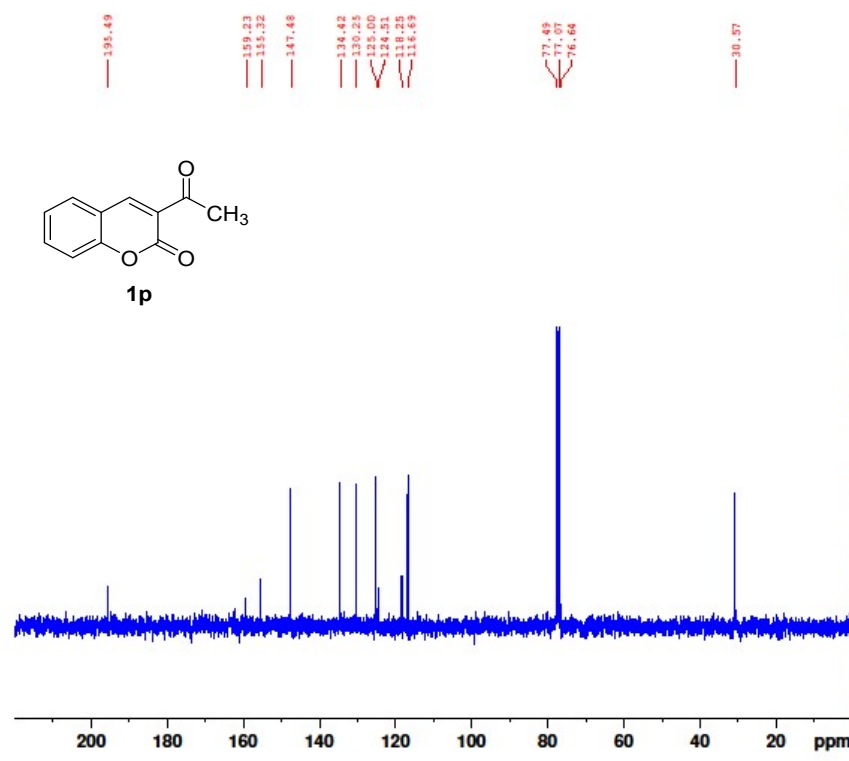

**BRUKER**

Current Data Parameters  
 NAME 240809-1A-1P-13C  
 EXPNO 1  
 PROCNO 1

F2 - Acquisition Parameters  
 Date\_ 20240809  
 Time 18.36  
 INSTRUM spect  
 PROBHD 5 mm PABBO BB-  
 PULPROG zgpg30  
 TD 32768  
 SOLVENT CDCl3  
 NS 64  
 DS 0  
 SWH 18028.846 Hz  
 FIDRES 0.550197 Hz  
 AQ 0.9087659 sec  
 RG 219.17  
 DW 27.733 usec  
 DE 6.50 usec  
 TE 298.1 K  
 D1 2.0000000 sec  
 D11 0.03000000 sec  
 TDO 1

==== CHANNEL f1 =====  
 SFO1 75.4756726 MHz  
 NUC1 13C  
 P1 10.00 usec  
 PLW1 28.29999924 W

==== CHANNEL f2 =====  
 SFO2 300.1312005 MHz  
 NUC2 1H  
 CPDPRG2 bi\_waltz65\_256  
 FCPD2 90.00 usec  
 PLW2 8.30000019 W  
 PLW12 0.20084000 W  
 PLW13 0.16268000 W

F2 - Processing parameters  
 SI 32768  
 SF 75.4677485 MHz  
 MW EM  
 SSB 0  
 LB 2.00 Hz  
 GB 0  
 PC 1.00

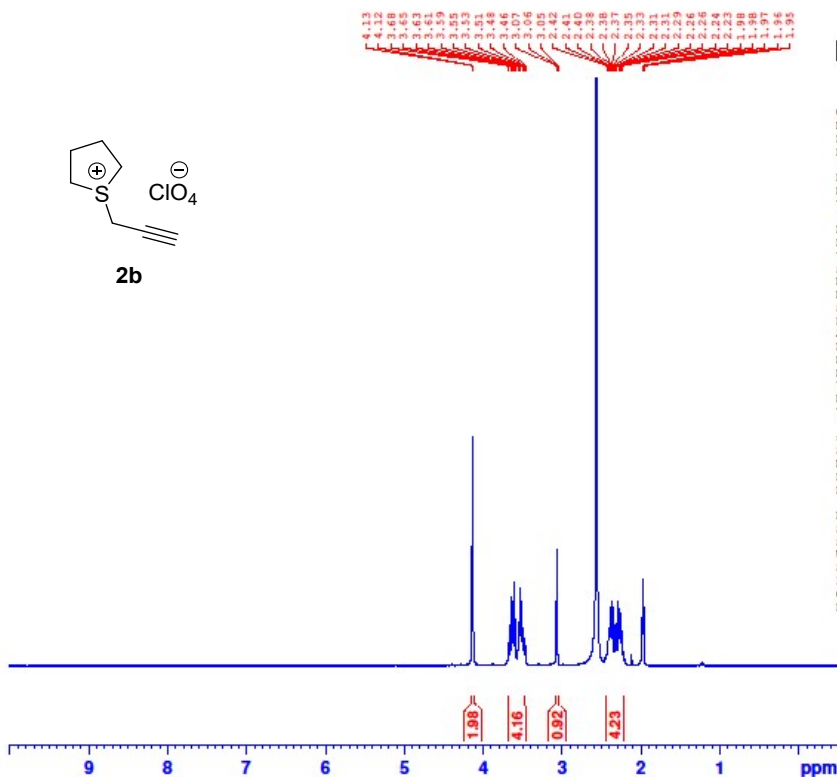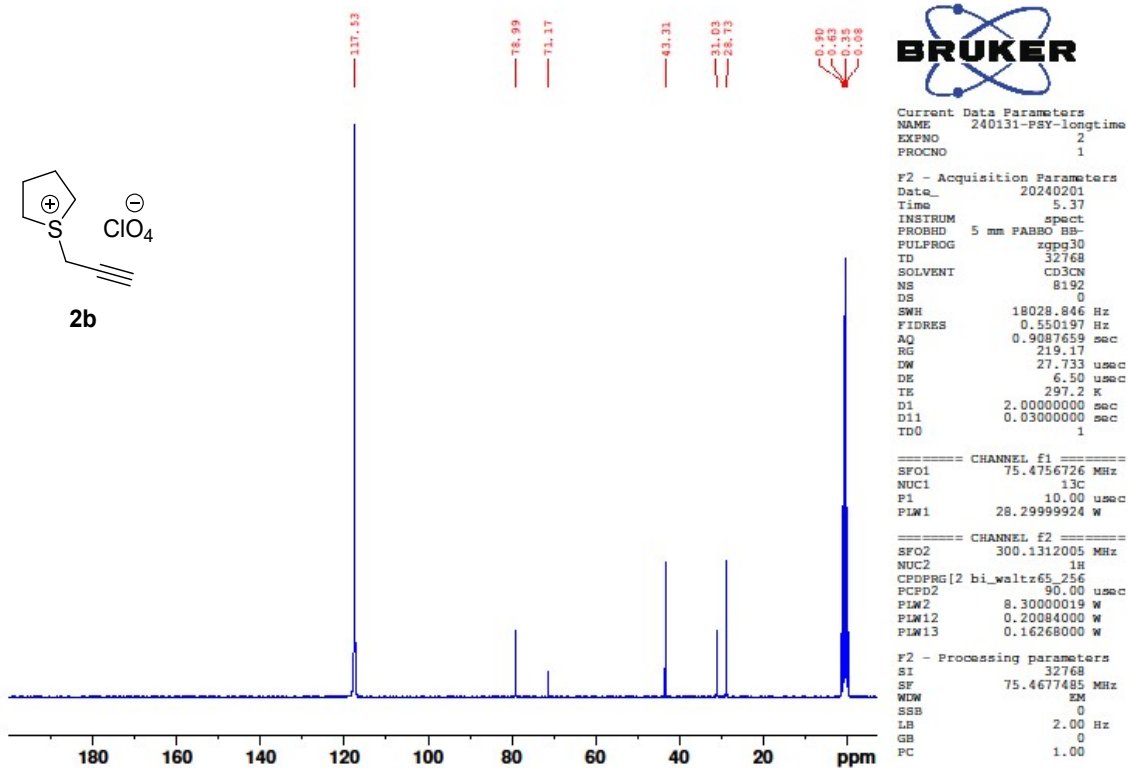

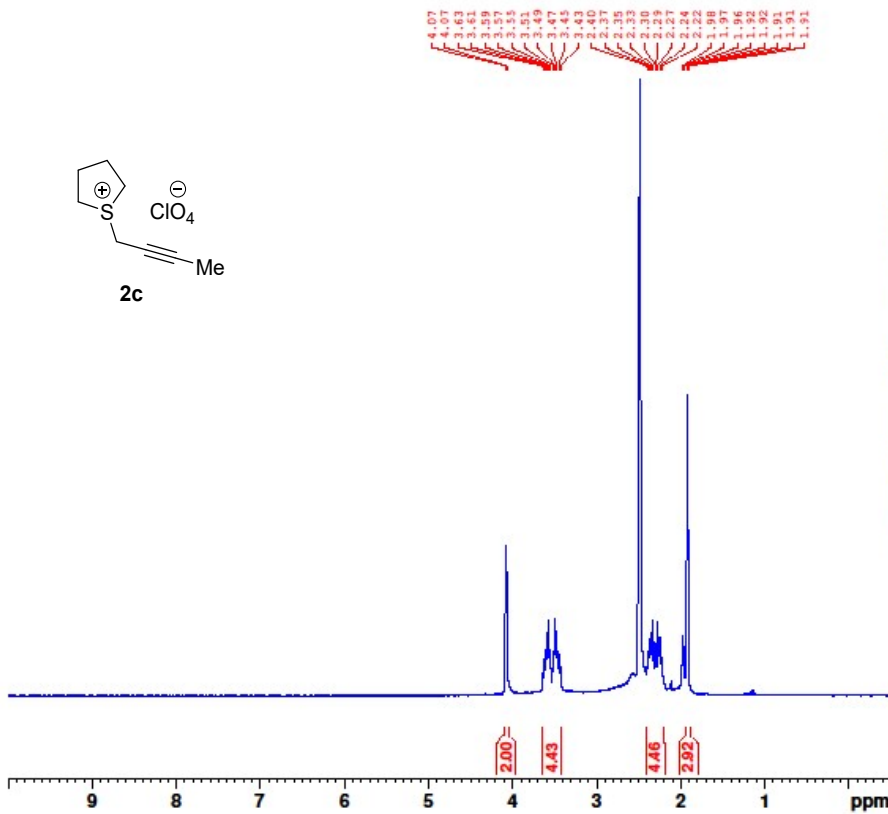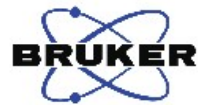

Current Data Parameters  
 NAME 240425-1A-PSYME-LONGTIME  
 EXPNO 1  
 PROCNO 1

F2 - Acquisition Parameters  
 Date\_ 20240425  
 Time 15.17  
 INSTRUM spect  
 PROBRD 5 mm PABBO BB-  
 PULPROG zg30  
 TD 32768  
 SOLVENT CD3CN  
 NS 64  
 DS 0  
 SWH 5009.615 Hz  
 FIDRES 0.183399 Hz  
 AQ 2.7262976 sec  
 RG 121.85  
 DW 83.200 usec  
 DE 12.63 usec  
 TE 299.0 K  
 D1 2.0000000 sec  
 TDO 1

--- CHANNEL f1 ---  
 SFO1 300.1318008 MHz  
 NUC1 1H  
 P1 14.00 usec  
 PLW1 7.69999981 W

F2 - Processing parameters  
 SI 16384  
 SF 300.1300000 MHz  
 MDW EM  
 SSB 0  
 LB 0 Hz  
 GB 0  
 PC 1.00

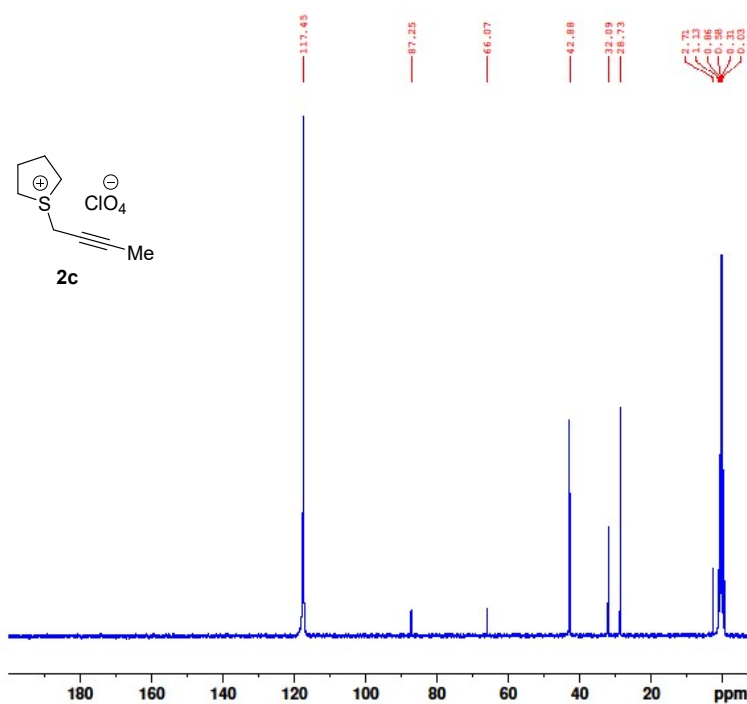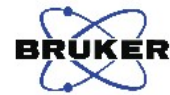

Current Data Parameters  
 NAME 240425-1A-PSYME-LONGTIME  
 EXPNO 2  
 PROCNO 1

F2 - Acquisition Parameters  
 Date\_ 20240425  
 Time 16.56  
 INSTRUM spect  
 PROBRD 5 mm PABBO BB-  
 PULPROG zgpg30  
 TD 32768  
 SOLVENT CD3CN  
 NS 1933  
 DS 0  
 SWH 18028.846 Hz  
 FIDRES 0.550197 Hz  
 AQ 0.9087659 sec  
 RG 219.17  
 DW 27.733 usec  
 DE 6.50 usec  
 TE 303.3 K  
 D1 2.0000000 sec  
 D11 0.0300000 sec  
 TDO 1

--- CHANNEL f1 ---  
 SFO1 75.4756726 MHz  
 NUC1 13C  
 P1 10.00 usec  
 PLW1 28.29999924 W

--- CHANNEL f2 ---  
 SFO2 300.1312005 MHz  
 NUC2 1H  
 CPDPRG2 bt\_waltz66\_256  
 PCPD2 90.00 usec  
 P1M2 8.30000019 W  
 P1M12 0.20084000 W  
 P1M13 0.15268000 W

F2 - Processing parameters  
 SI 32768  
 SF 75.4677485 MHz  
 MDW EM  
 SSB 0  
 LB 2.00 Hz  
 GB 0  
 PC 1.00

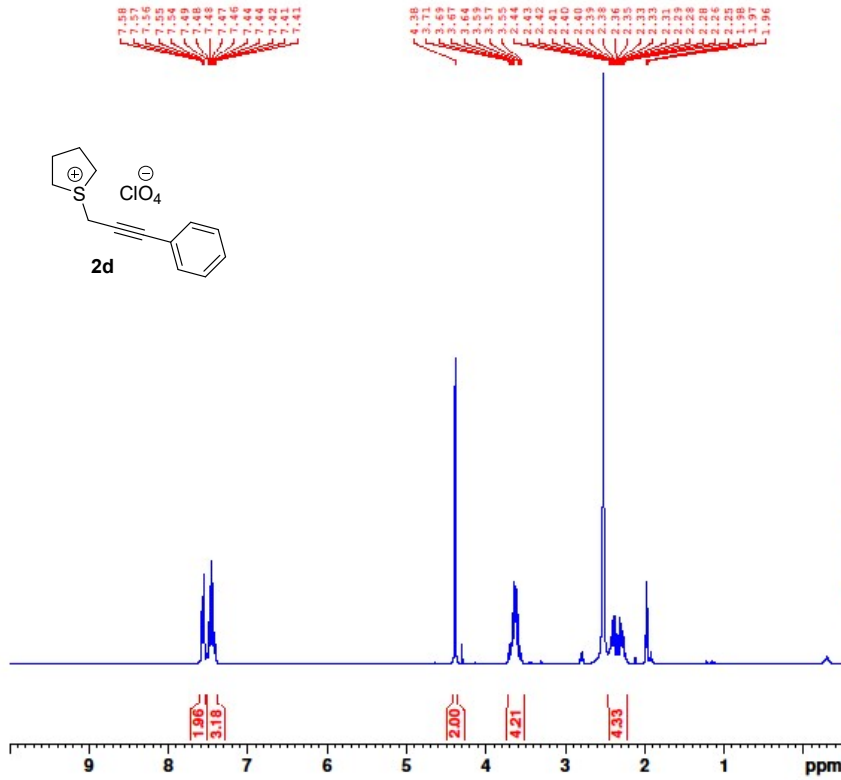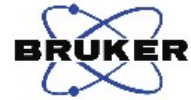

Current Data Parameters  
 NAME 240720-1A-Ph-PClSy  
 EXPNO 2  
 PROCNO 1

F2 - Acquisition Parameters  
 Date\_ 20240720  
 Time 21.27  
 INSTRUM spect  
 PROBHD 5 mm PABBO BB-  
 PULPROG zg30  
 TD 32768  
 SOLVENT CD3CN  
 NS 1024  
 DS 0  
 SWH 6009.615 Hz  
 FIDRES 0.183399 Hz  
 AQ 2.7262976 sec  
 RG 121.95  
 DW 83.200 usec  
 DE 12.63 usec  
 TE 297.0 K  
 D1 2.00000000 sec  
 TDO 1

==== CHANNEL f1 =====  
 SFO1 300.1318008 MHz  
 NUC1 1H  
 P1 14.00 usec  
 PLW1 7.69999981 W

F2 - Processing parameters  
 SI 16384  
 SF 300.1300000 MHz  
 WDW EM  
 SSB 0  
 LB 0 Hz  
 GB 0  
 PC 1.00

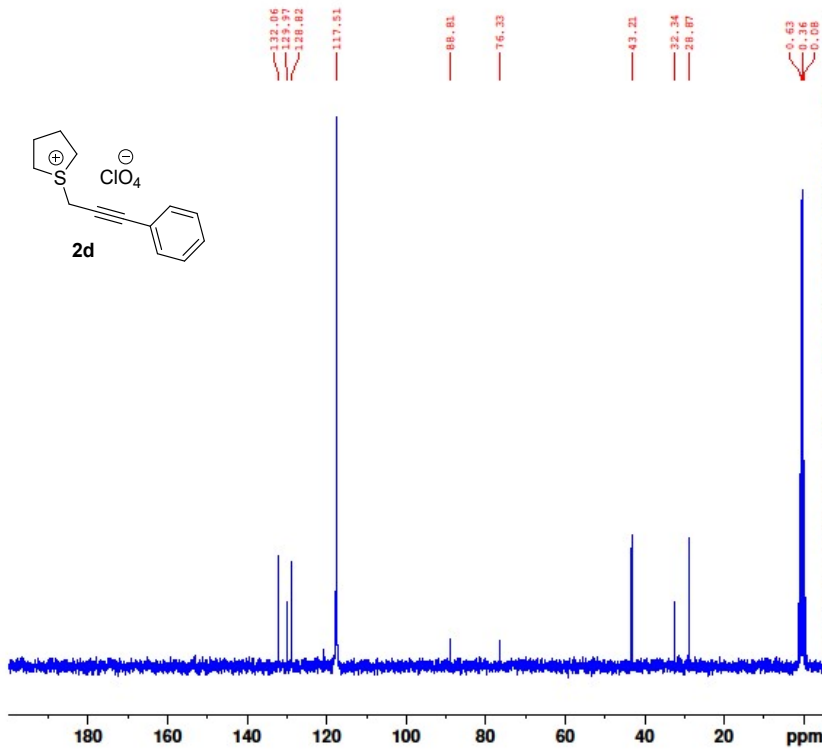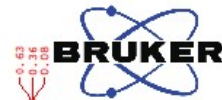

Current Data Parameters  
 NAME 240720-1A-Ph-PClSy-13c  
 EXPNO 1  
 PROCNO 1

F2 - Acquisition Parameters  
 Date\_ 20240720  
 Time 22.24  
 INSTRUM spect  
 PROBHD 5 mm PABBO BB-  
 PULPROG zgpg30  
 TD 32768  
 SOLVENT CD3CN  
 NS 32  
 DS 0  
 SWH 18028.846 Hz  
 FIDRES 0.550197 Hz  
 AQ 0.9087659 sec  
 RG 219.17  
 DW 27.733 usec  
 DE 6.50 usec  
 TE 297.2 K  
 D1 2.00000000 sec  
 D11 0.03000000 sec  
 TDO 1

==== CHANNEL f1 =====  
 SFO1 75.4756726 MHz  
 NUC1 13C  
 P1 10.00 usec  
 PLW1 28.29999924 W

==== CHANNEL f2 =====  
 SFO2 300.1312005 MHz  
 NUC2 1H  
 CPDPRG[2] bi\_waltz165\_256  
 PCPD2 90.00 usec  
 PLW2 8.3000019 W  
 PLW12 0.20084000 W  
 PLW13 0.16268000 W

F2 - Processing parameters  
 SI 32768  
 SF 75.4677485 MHz  
 WDW EM  
 SSB 0  
 LB 2.00 Hz  
 GB 0  
 PC 1.00

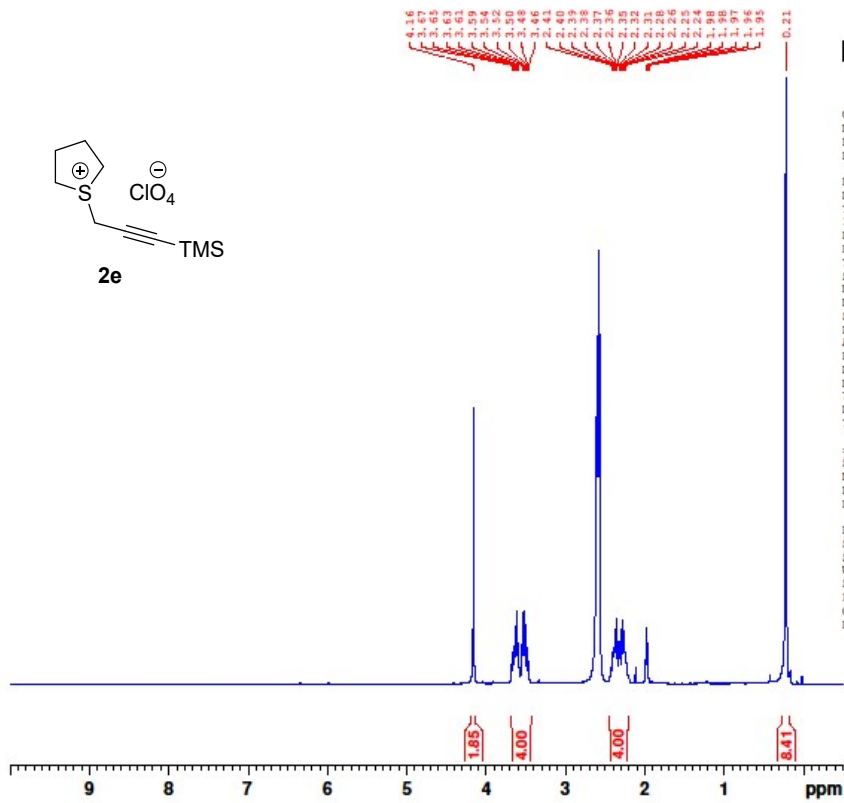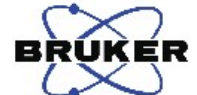

Current Data Parameters  
 NAME 240426-LA-PSYIMS  
 EXPNO 1  
 PROCNO 1

F2 - Acquisition Parameters  
 Date\_ 20240426  
 Time 23:46  
 INSTRUM spect  
 PROBHD 5 mm PABBO BB-  
 PULPROG zg30  
 TD 32768  
 SOLVENT CD3CN  
 NS 64  
 DS 0  
 SWH 6009.615 Hz  
 FIDRES 0.183399 Hz  
 AQ 2.7262976 sec  
 RG 96.06  
 DW 83.200 usec  
 DE 12.63 usec  
 TE 296.8 K  
 D1 2.0000000 sec  
 TD0 1

==== CHANNEL f1 =====  
 SFO1 300.1318008 MHz  
 NUC1 1H  
 P1 14.00 usec  
 PLW1 7.69999981 W

F2 - Processing parameters  
 SI 16384  
 SF 300.1300000 MHz  
 WDW EM  
 SSB 0  
 LB 0 Hz  
 GB 0  
 PC 1.00

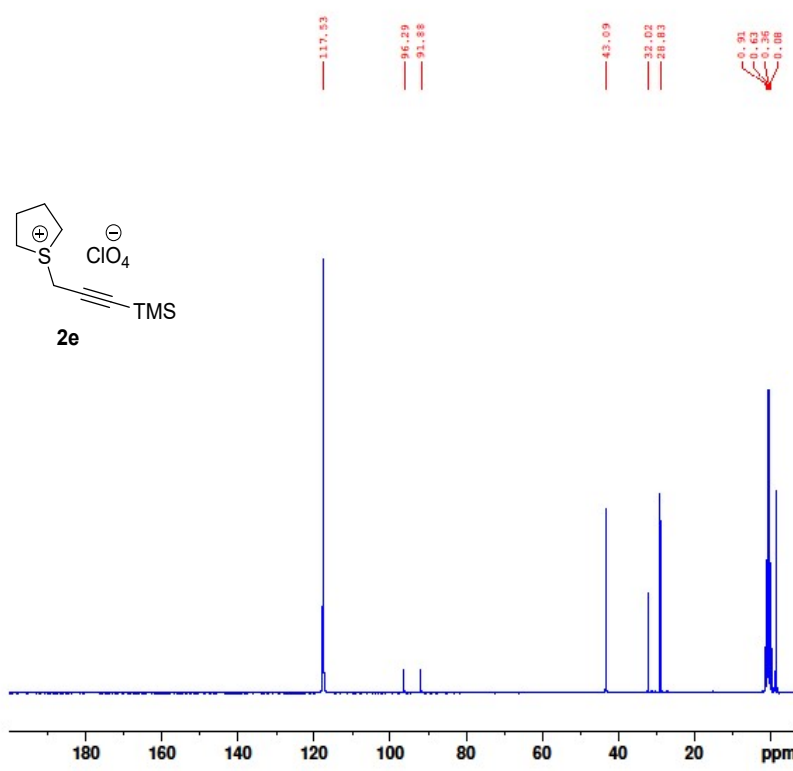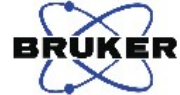

Current Data Parameters  
 NAME 240426-LA-PSYIMS  
 EXPNO 2  
 PROCNO 1

F2 - Acquisition Parameters  
 Date\_ 20240427  
 Time 9:55  
 INSTRUM spect  
 PROBHD 5 mm PABBO BB-  
 PULPROG zgpg30  
 TD 32768  
 SOLVENT CD3CN  
 NS 12288  
 DS 0  
 SWH 18028.846 Hz  
 FIDRES 0.550197 Hz  
 AQ 0.9087659 sec  
 RG 219.17  
 DW 27.733 usec  
 DE 6.50 usec  
 TE 297.9 K  
 D1 2.0000000 sec  
 D11 0.0300000 sec  
 TD0 1

==== CHANNEL f1 =====  
 SFO1 75.4756726 MHz  
 NUC1 13C  
 P1 10.00 usec  
 PLW1 28.29999924 W

==== CHANNEL f2 =====  
 SFO2 300.1312005 MHz  
 NUC2 1H  
 CPDPRG2 bi\_waltz65\_256  
 PCPD2 90.00 usec  
 PLW2 8.30000019 W  
 PLW12 0.20084000 W  
 PLW13 0.16268000 W

F2 - Processing parameters  
 SI 32768  
 SF 75.4677485 MHz  
 WDW EM  
 SSB 0  
 LB 2.00 Hz  
 GB 0  
 PC 1.00

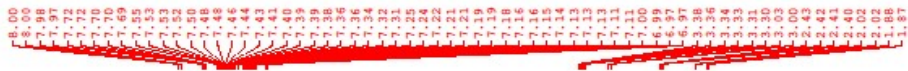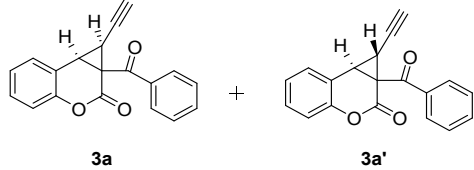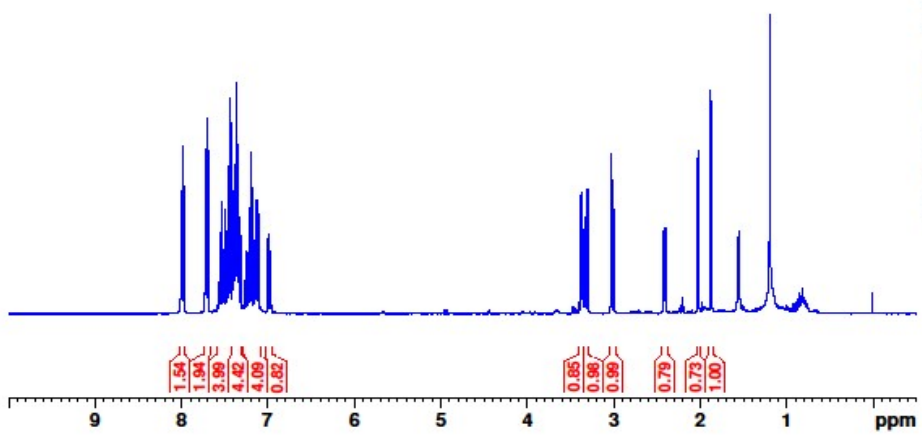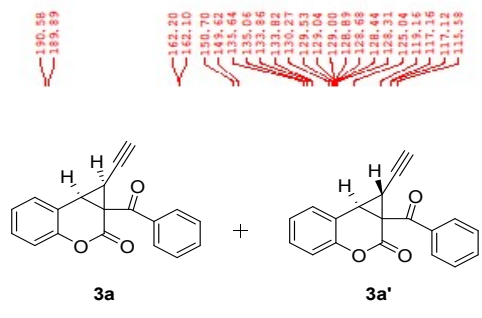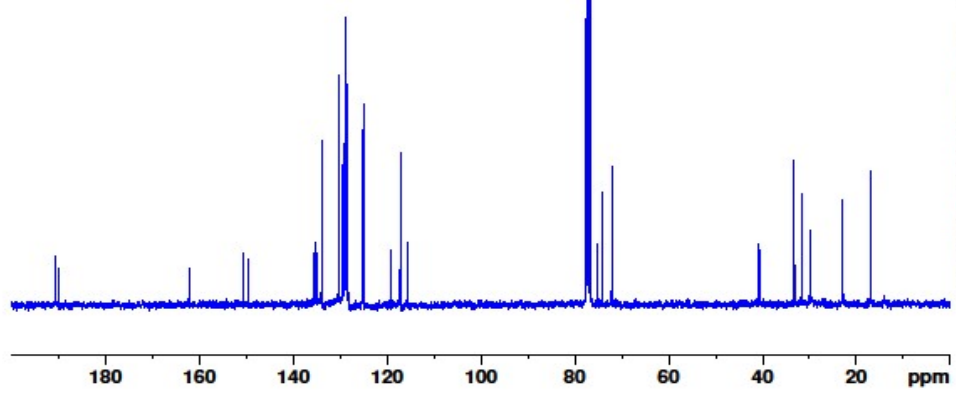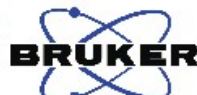

Current Data Parameters  
 NAME 230512-1A-11-OVERNIGHT  
 EXPNO 1  
 PROCNO 1

F2 - Acquisition Parameters  
 Date\_ 20230513  
 Time 21.05  
 INSTRUM spect  
 PROBHD 5 mm PABBO BB-  
 PULPROG zg30  
 TD 32768  
 ID 32768  
 SOLVENT CDCl3  
 NS 13  
 DS 0  
 SWH 6009.615 Hz  
 FIDRES 0.183399 Hz  
 AQ 2.7262976 sec  
 RG 194.81  
 LW 83.200 usec  
 DE 12.63 usec  
 TE 296.6 K  
 D1 2.0000000 sec  
 TDO 1

----- CHANNEL f1 -----  
 SFO1 300.1318008 MHz  
 NUC1 1H  
 P1 14.00 usec  
 PLW1 7.69999981 W

F2 - Processing parameters  
 SI 16384  
 SF 300.1300278 MHz  
 WDW EM  
 SSB 0  
 LB 0 Hz  
 GB 0  
 PC 1.00

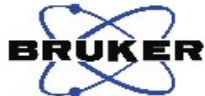

Current Data Parameters  
 NAME 230512-1A-11-OVERNIGHT  
 EXPNO 3  
 PROCNO 1

F2 - Acquisition Parameters  
 Date\_ 20230514  
 Time 1.29  
 INSTRUM spect  
 PROBHD 5 mm PABBO BB-  
 PULPROG zgpg30  
 TD 32768  
 ID 32768  
 SOLVENT CDCl3  
 NS 2048  
 DS 0  
 SWH 18028.846 Hz  
 FIDRES 0.550197 Hz  
 AQ 0.9087659 sec  
 RG 219.17  
 DW 27.733 usec  
 DE 6.50 usec  
 TE 297.5 K  
 D1 2.0000000 sec  
 D11 0.03000000 sec  
 TDO 1

----- CHANNEL f1 -----  
 SFO1 75.4756726 MHz  
 NUC1 13C  
 P1 19.00 usec  
 PLW1 28.29999924 W

----- CHANNEL f2 -----  
 SFO2 300.1312005 MHz  
 NUC2 1H  
 CPDPRG2 b1\_waltz65\_256  
 PCPD2 90.00 usec  
 PLW2 8.30000019 W  
 PLW12 0.30084000 W  
 PLW13 0.16268000 W

F2 - Processing parameters  
 SI 32768  
 SF 75.4677485 MHz  
 WDW EM  
 SSB 0  
 LB 2.00 Hz  
 GB 0  
 PC 1.00

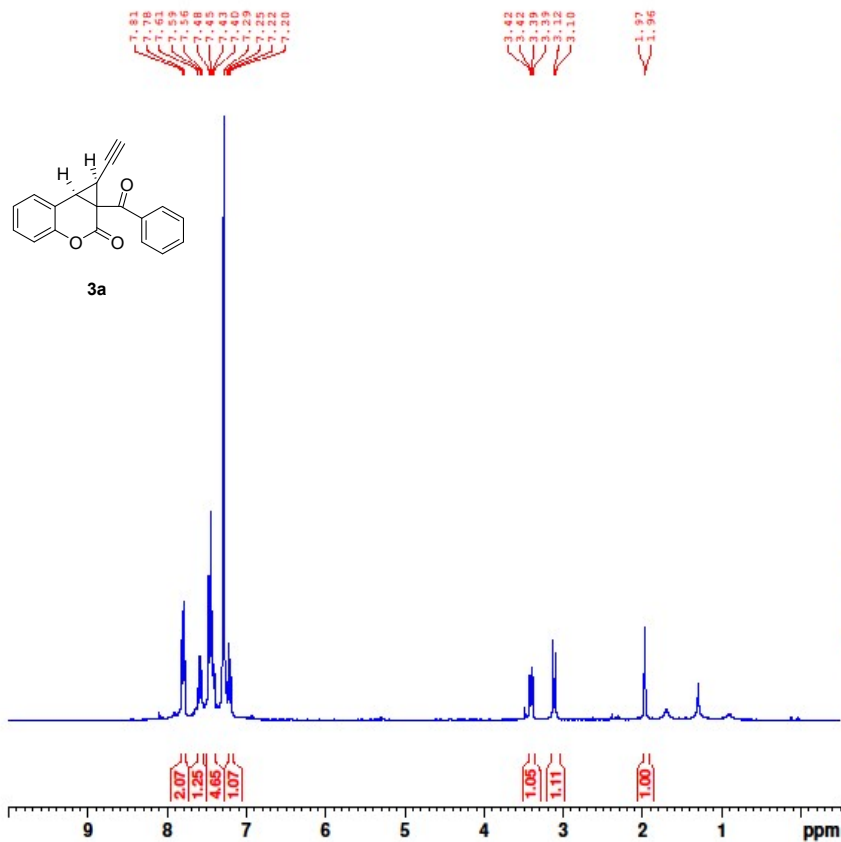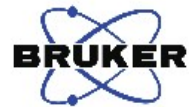

Current Data Parameters  
 NAME 240429-IA-L1-a  
 EXPNO 1  
 PROCNO 1

F2 - Acquisition Parameters  
 Date\_ 20240429  
 Time 14.04  
 INSTRUM spect  
 PROBHD 5 mm PABBO BB-  
 PULPROG zg30  
 TD 32768  
 SOLVENT CDCl3  
 NS 16  
 DS 0  
 SWH 6009.615 Hz  
 FIDRES 0.183399 Hz  
 AQ 2.7262976 sec  
 RG 106.61  
 DW 83.200 usec  
 DE 12.63 usec  
 TE 297.1 K  
 D1 2.0000000 sec  
 TD0 1

==== CHANNEL f1 =====  
 SFO1 300.1318008 MHz  
 NUC1 1H  
 P1 14.00 usec  
 PLW1 7.69999981 W

F2 - Processing parameters  
 SI 16384  
 SF 300.1300000 MHz  
 WDW EM  
 SSB 0  
 LB 0 Hz  
 GB 0  
 PC 1.00

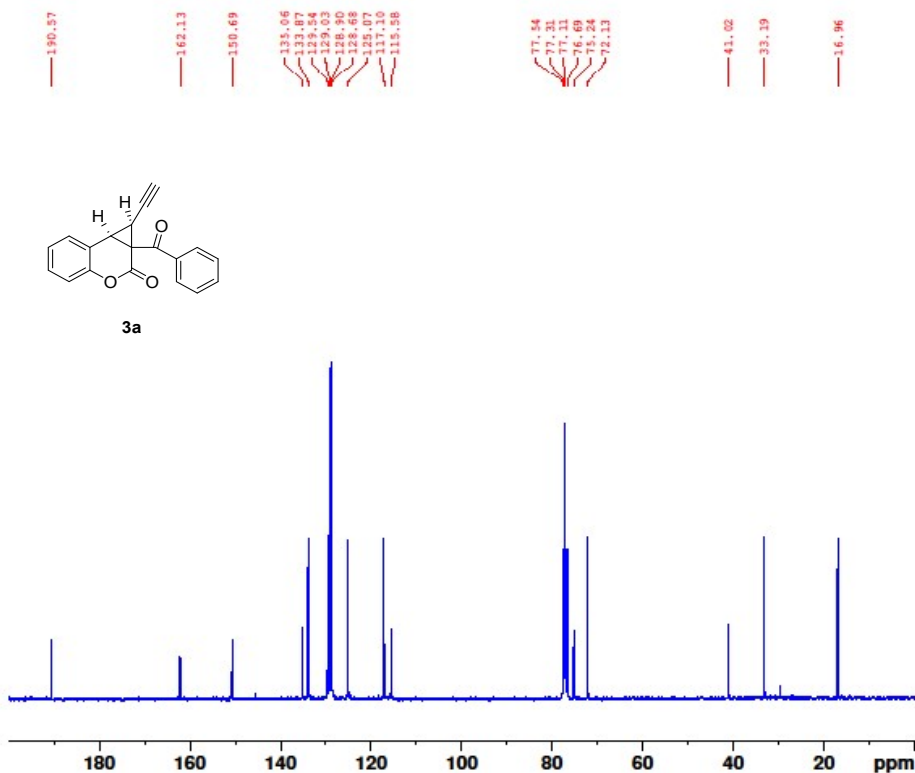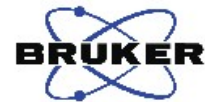

Current Data Parameters  
 NAME 240429-IA-L1-a  
 EXPNO 2  
 PROCNO 1

F2 - Acquisition Parameters  
 Date\_ 20240429  
 Time 15.45  
 INSTRUM spect  
 PROBHD 5 mm PABBO BB-  
 PULPROG zgpg30  
 TD 32768  
 SOLVENT CDCl3  
 NS 2048  
 DS 0  
 SWH 18028.846 Hz  
 FIDRES 0.550197 Hz  
 AQ 0.9087659 sec  
 RG 219.17  
 DW 27.733 usec  
 DE 6.50 usec  
 TE 298.0 K  
 D1 2.0000000 sec  
 D11 0.03000000 sec  
 TD0 1

==== CHANNEL f1 =====  
 SFO1 75.4756726 MHz  
 NUC1 13C  
 P1 10.00 usec  
 PLW1 28.29999924 W

==== CHANNEL f2 =====  
 SFO2 300.1312005 MHz  
 NUC2 1H  
 CPM2PRG[2 bi\_waltz65\_256  
 PCPD2 90.00 usec  
 PLW2 8.30000019 W  
 PLW12 0.20084000 W  
 PLW13 0.16268000 W

F2 - Processing parameters  
 SI 32768  
 SF 75.4677485 MHz  
 WDW EM  
 SSB 0  
 LB 2.00 Hz  
 GB 0  
 PC 1.00

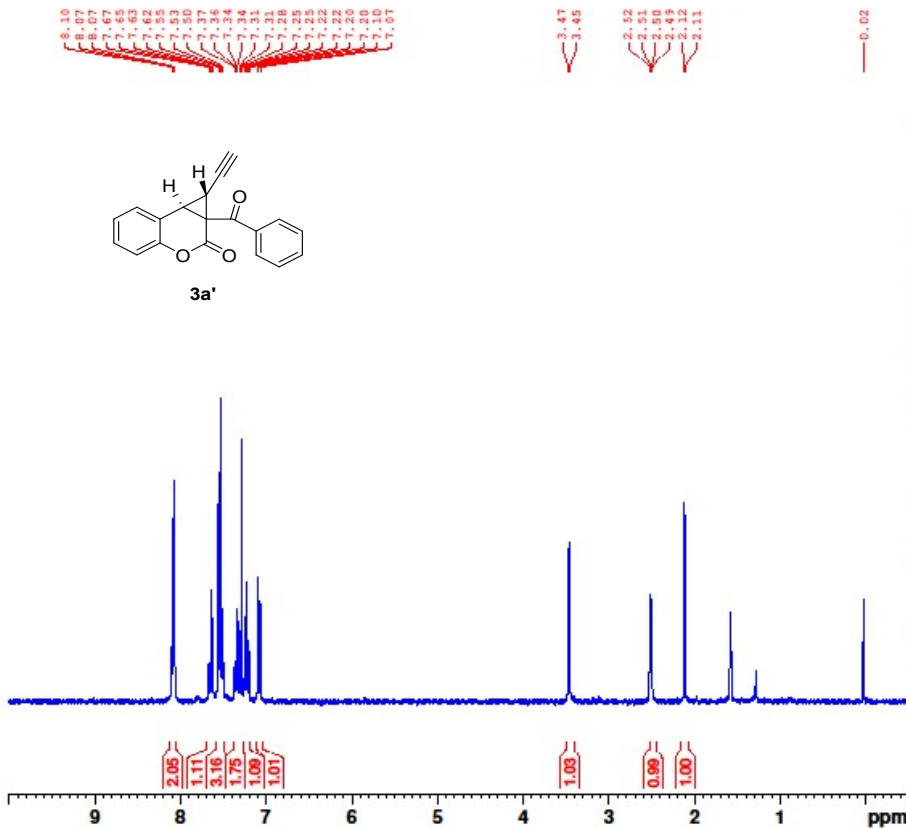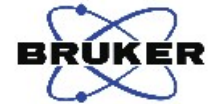

Current Data Parameters  
 NAME 230801-LA-L1-a'-1H  
 EXPNO 1  
 PROCNO 1

F2 - Acquisition Parameters  
 Date\_ 20230801  
 Time 16.15  
 INSTRUM spect  
 PROBHD 5 mm PABBO BB-  
 PULPROG zg30  
 ID 32768  
 SOLVENT CDCl3  
 NS 16  
 DS 0  
 SWH 6009.615 Hz  
 FIDRES 0.183399 Hz  
 AQ 2.7262976 sec  
 RG 219.17  
 DW 83.200 usec  
 DE 12.63 usec  
 TE 297.4 K  
 D1 2.00000000 sec  
 TD0 1

==== CHANNEL f1 =====  
 SFO1 300.1318008 MHz  
 NUC1 1H  
 P1 14.00 usec  
 PLW1 7.69999981 W

F2 - Processing parameters  
 SI 16384  
 SF 300.1300000 MHz  
 WDW EM  
 SSB 0  
 LB 0 Hz  
 GB 0  
 PC 1.00

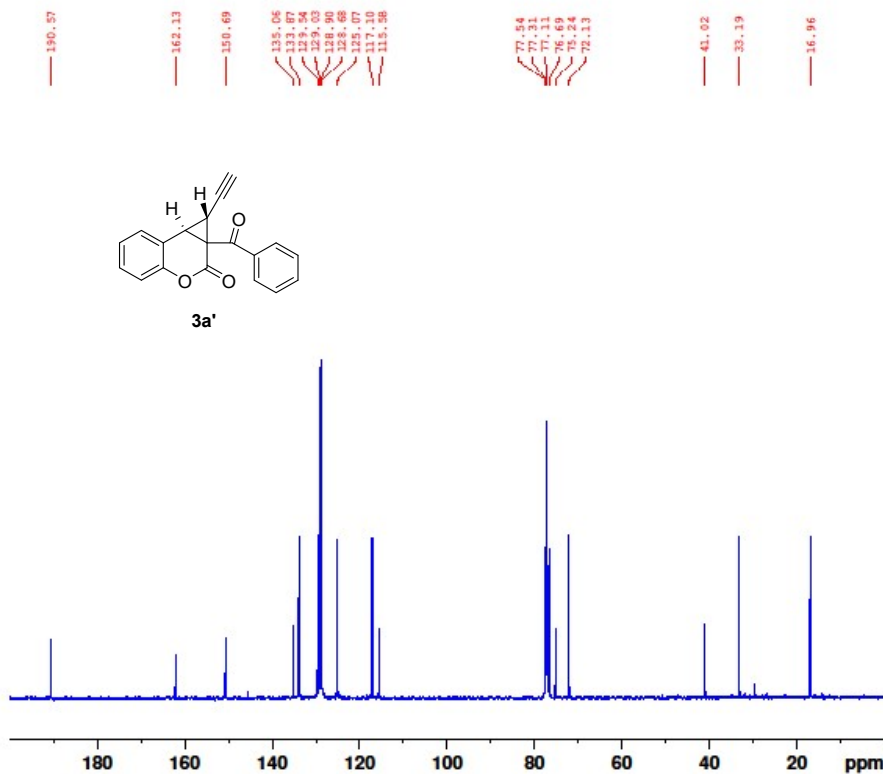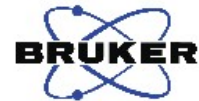

Current Data Parameters  
 NAME 240429-LA-L1-a'  
 EXPNO 2  
 PROCNO 1

F2 - Acquisition Parameters  
 Date\_ 20240429  
 Time 15.45  
 INSTRUM spect  
 PROBHD 5 mm PABBO BB-  
 PULPROG zgpg30  
 ID 32768  
 SOLVENT CDCl3  
 NS 2048  
 DS 0  
 SWH 18028.846 Hz  
 FIDRES 0.550197 Hz  
 AQ 0.9087659 sec  
 RG 219.17  
 DW 27.733 usec  
 DE 6.50 usec  
 TE 298.0 K  
 D1 2.00000000 sec  
 D11 0.03000000 sec  
 TD0 1

==== CHANNEL f1 =====  
 SFO1 75.4756726 MHz  
 NUC1 13C  
 P1 10.00 usec  
 PLW1 28.29999924 W

==== CHANNEL f2 =====  
 SFO2 300.1312005 MHz  
 NUC2 1H  
 CPDPRG2 bi\_waltz65\_256  
 PCPD2 90.00 usec  
 PLW2 8.30000019 W  
 PLW12 0.20084000 W  
 PLW13 0.16268000 W

F2 - Processing parameters  
 SI 32768  
 SF 75.4677485 MHz  
 WDW EM  
 SSB 0  
 LB 2.00 Hz  
 GB 0  
 PC 1.00





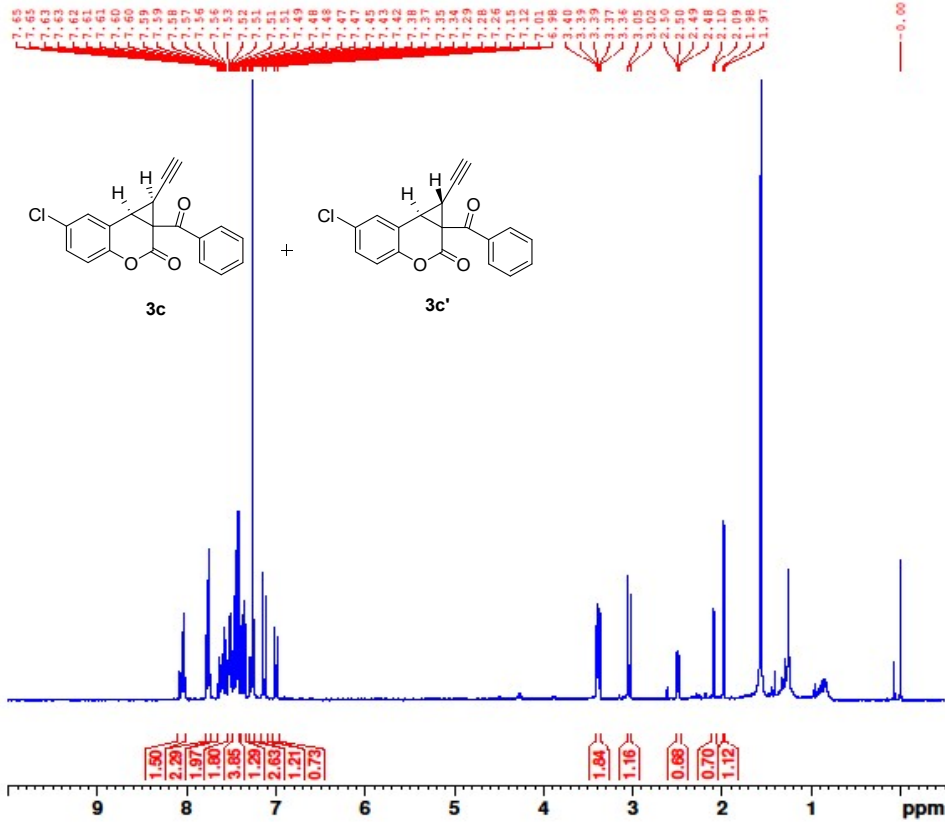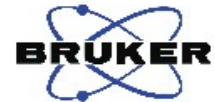

Current Data Parameters  
 NAME L7  
 EXPNO 1  
 PROCNO 1

F2 - Acquisition Parameters  
 Date\_ 20231112  
 Time 14.12  
 INSTRUM spect  
 PROBHD 5 mm FAPBO BB-  
 PULPROG zg30  
 ID 32768  
 SOLVENT CDCl3  
 NS 64  
 DS 0  
 SWH 6009.615 Hz  
 FIDRES 0.183399 Hz  
 AQ 2.7262976 sec  
 RG 219.17  
 DW 83.200 usec  
 DE 12.63 usec  
 TE 297.9 K  
 D1 2.00000000 sec  
 TDO 1

==== CHANNEL f1 =====  
 SFO1 300.1318008 MHz  
 NUC1 1H  
 P1 14.00 usec  
 PLW1 7.69999981 W

F2 - Processing parameters  
 SI 16384  
 SF 300.1300079 MHz  
 WDW EM  
 SSB 0  
 LB 0 Hz  
 GB 0  
 PC 1.00

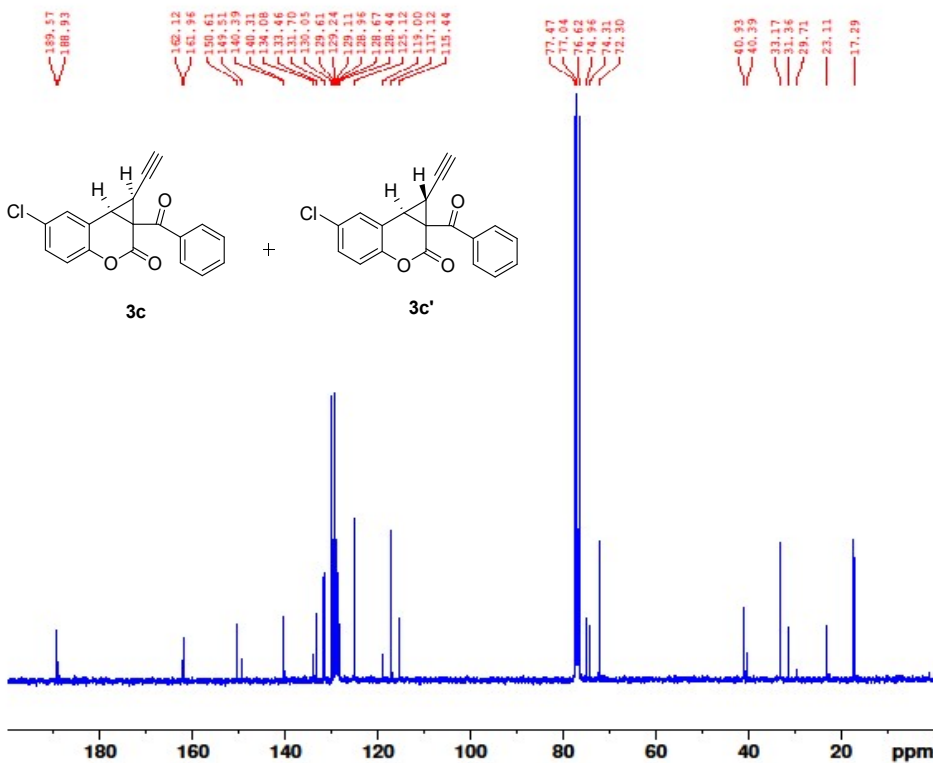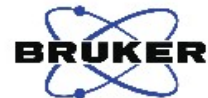

Current Data Parameters  
 NAME L7  
 EXPNO 2  
 PROCNO 1

F2 - Acquisition Parameters  
 Date\_ 20240101  
 Time 18.49  
 INSTRUM spect  
 PROBHD 5 mm FAPBO BB-  
 PULPROG zgpg30  
 ID 32768  
 SOLVENT CDCl3  
 NS 2048  
 DS 0  
 SWH 18028.846 Hz  
 FIDRES 0.550197 Hz  
 AQ 0.9087659 sec  
 RG 219.17  
 DW 27.733 usec  
 DE 6.50 usec  
 TE 298.5 K  
 D1 2.00000000 sec  
 D11 0.03000000 sec  
 TDO 1

==== CHANNEL f1 =====  
 SFO1 75.4756726 MHz  
 NUC1 13C  
 P1 10.00 usec  
 PLW1 28.29999924 W

==== CHANNEL f2 =====  
 SFO2 300.1312005 MHz  
 NUC2 1H  
 CPDPRG2 bi\_waltz65\_256  
 PCPD2 90.00 usec  
 PLW2 8.30000019 W  
 PLW12 0.20084000 W  
 PLW13 0.16268000 W

F2 - Processing parameters  
 SI 32768  
 SF 75.4677485 MHz  
 WDW EM  
 SSB 0  
 LB 2.00 Hz  
 GB 0  
 PC 1.00

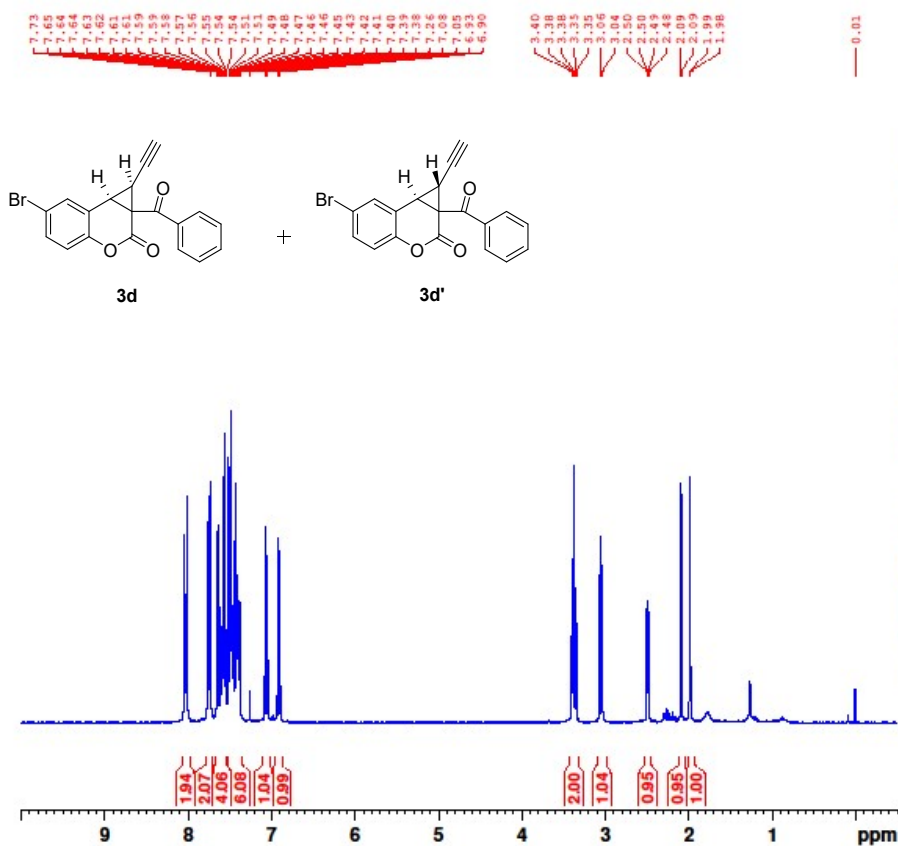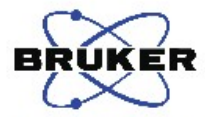

Current Data Parameters  
 NAME 240101-LA-L8  
 EXPNO 1  
 PROCNO 1

F2 - Acquisition Parameters  
 Date\_ 20240101  
 Time 15.05  
 INSTRUM spect  
 PROBHD 5 mm PABBO BB-  
 PULPROG zg30  
 TD 32768  
 SOLVENT CDCl3  
 NS 64  
 DS 0  
 SWH 6009.615 Hz  
 FIDRES 0.183399 Hz  
 AQ 2.7262976 sec  
 RG 106.61  
 DW 83.200 usec  
 DE 12.63 usec  
 TE 297.5 K  
 D1 2.00000000 sec  
 TD0 1

==== CHANNEL f1 =====  
 SFO1 300.1318008 MHz  
 NUC1 1H  
 P1 14.00 usec  
 PLW1 7.69999981 W

F2 - Processing parameters  
 SI 16384  
 SF 300.1300071 MHz  
 WDW EM  
 SSB 0  
 LB 0 Hz  
 GB 0  
 PC 1.00

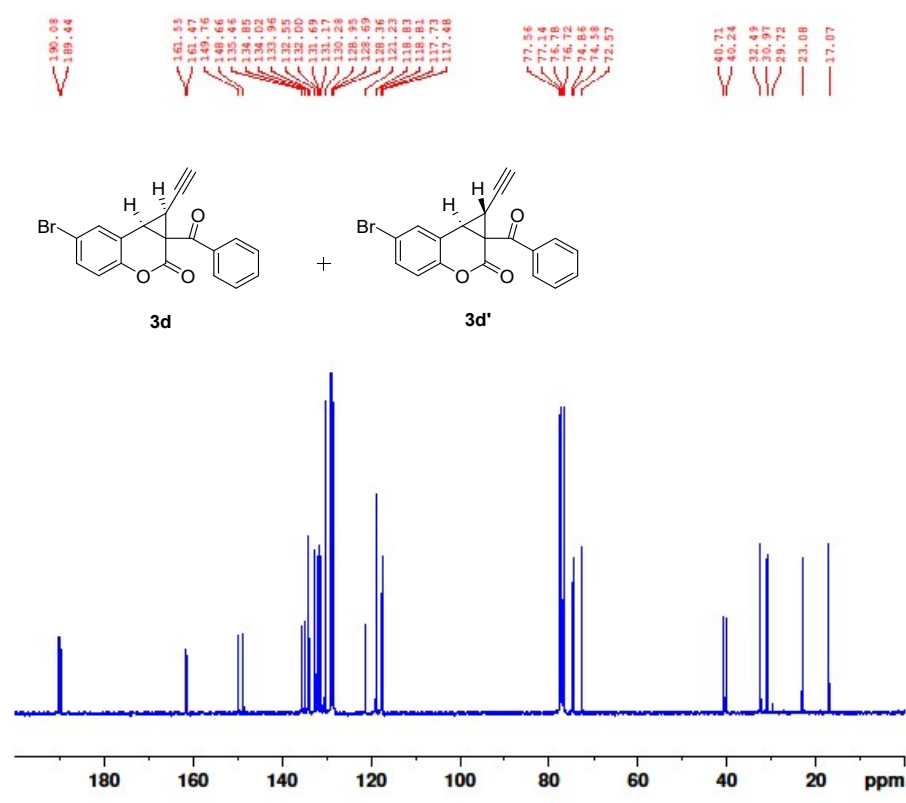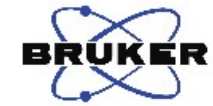

Current Data Parameters  
 NAME 240101-LA-L8  
 EXPNO 2  
 PROCNO 1

F2 - Acquisition Parameters  
 Date\_ 20240101  
 Time 16.51  
 INSTRUM spect  
 PROBHD 5 mm PABBO BB-  
 PULPROG zgpg30  
 TD 32768  
 SOLVENT CDCl3  
 NS 2048  
 DS 0  
 SWH 18028.846 Hz  
 FIDRES 0.550197 Hz  
 AQ 0.9087659 sec  
 RG 219.17  
 DW 27.733 usec  
 DE 6.50 usec  
 TE 298.5 K  
 D1 2.00000000 sec  
 D11 0.03000000 sec  
 TD0 1

==== CHANNEL f1 =====  
 SFO1 75.4756726 MHz  
 NUC1 13C  
 P1 10.00 usec  
 PLW1 28.29999924 W

==== CHANNEL f2 =====  
 SFO2 300.1312005 MHz  
 NUC2 1H  
 CPDPRG2 bi\_waltz65\_256  
 PCPD2 90.00 usec  
 PLW2 8.30000019 W  
 PLW12 0.20084000 W  
 PLW13 0.16268000 W

F2 - Processing parameters  
 SI 32768  
 SF 75.4677485 MHz  
 WDW EM  
 SSB 0  
 LB 2.00 Hz  
 GB 0  
 PC 1.00

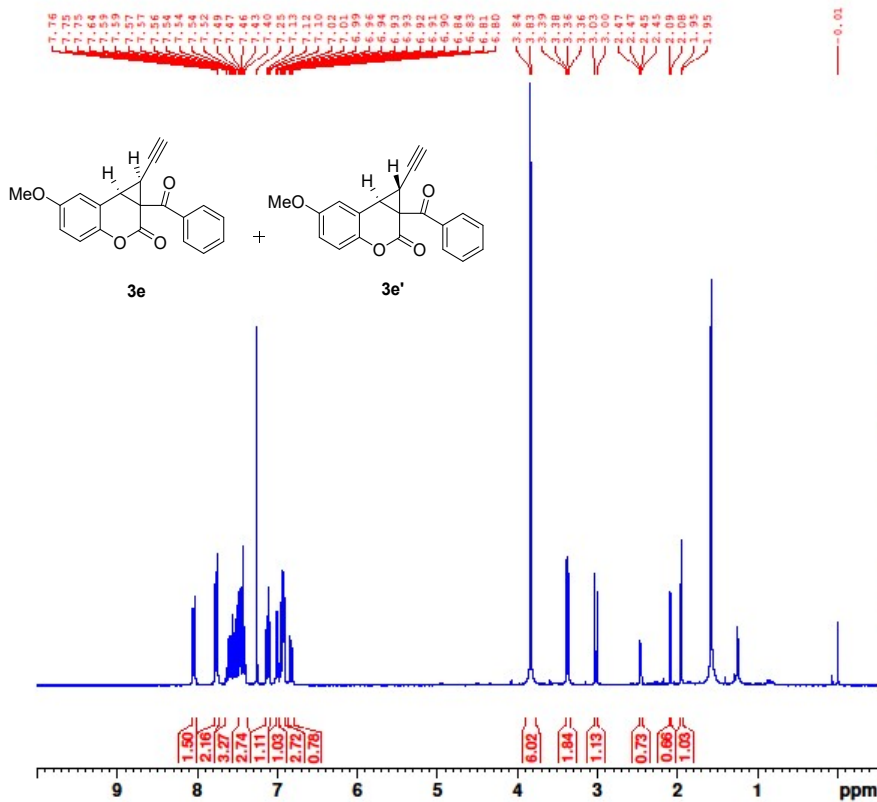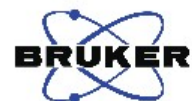

Current Data Parameters  
 NAME L3  
 EXPNO 1  
 PROCNO 1

F2 - Acquisition Parameters  
 Date\_ 20231103  
 Time 15.59  
 INSTRUM spect  
 PROBHD 5 mm PABBO BB-  
 PULPROG zq30  
 TD 32768  
 SOLVENT cdcl3  
 NS 64  
 DS 0  
 SWH 6009.615 Hz  
 FIDRES 0.183399 Hz  
 AQ 2.7262976 sec  
 RG 219.17  
 DW 83.200 usec  
 DE 12.63 usec  
 TE 295.8 K  
 D1 2.00000000 sec  
 TDO 1

==== CHANNEL f1 =====  
 SFO1 300.1318008 MHz  
 NUC1 1H  
 P1 14.00 usec  
 PLW1 7.69999981 W

F2 - Processing parameters  
 SI 16384  
 SF 300.1300089 MHz  
 WDW EM  
 SSB 0  
 LB 0 Hz  
 GB 0  
 PC 1.00

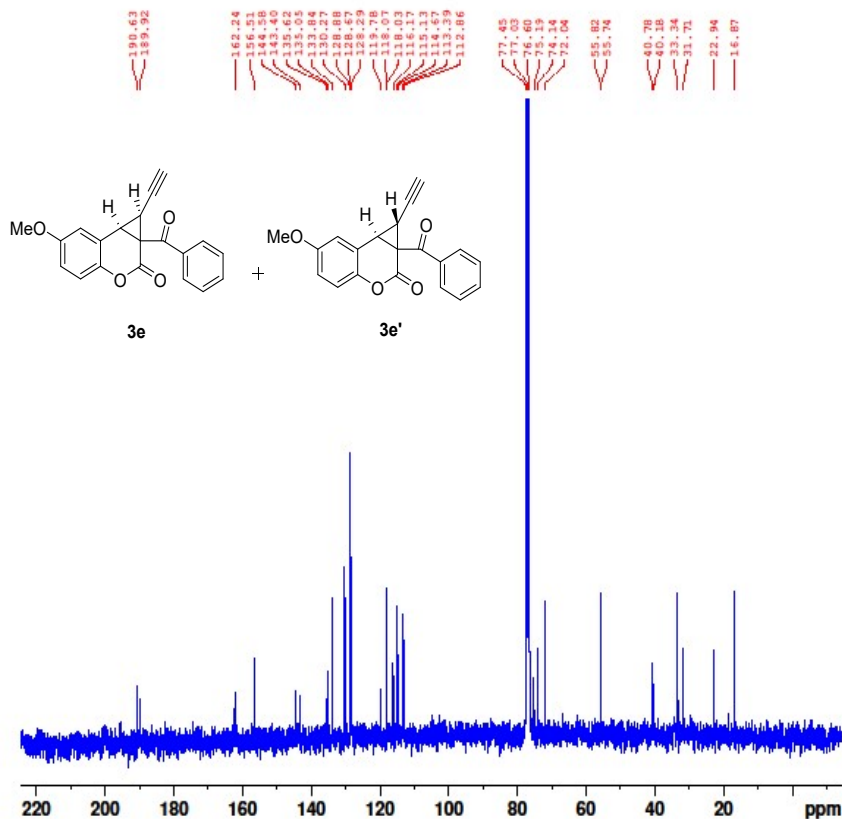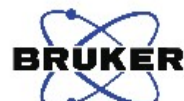

Current Data Parameters  
 NAME L3  
 EXPNO 2  
 PROCNO 1

F2 - Acquisition Parameters  
 Date\_ 20231103  
 Time 17.41  
 INSTRUM spect  
 PROBHD 5 mm PABBO BB-  
 PULPROG zq30  
 TD 32768  
 SOLVENT cdcl3  
 NS 2048  
 DS 0  
 SWH 18028.846 Hz  
 FIDRES 0.550197 Hz  
 AQ 0.9087659 sec  
 RG 219.17  
 DW 27.733 usec  
 DE 6.50 usec  
 TE 296.9 K  
 D1 2.00000000 sec  
 D11 0.03000000 sec  
 TDO 1

==== CHANNEL f1 =====  
 SFO1 75.4756726 MHz  
 NUC1 13C  
 P1 10.00 usec  
 PLW1 28.29999924 W

==== CHANNEL f2 =====  
 SFO2 300.1312005 MHz  
 NUC2 1H  
 CPDPRG2 bi\_waltz65\_256  
 PCPD2 90.00 usec  
 PLW2 8.30000019 W  
 PLW12 0.20084000 W  
 PLW13 0.16268000 W

F2 - Processing parameters  
 SI 32768  
 SF 75.4677485 MHz  
 WDW EM  
 SSB 0  
 LB 2.00 Hz  
 GB 0  
 PC 1.00

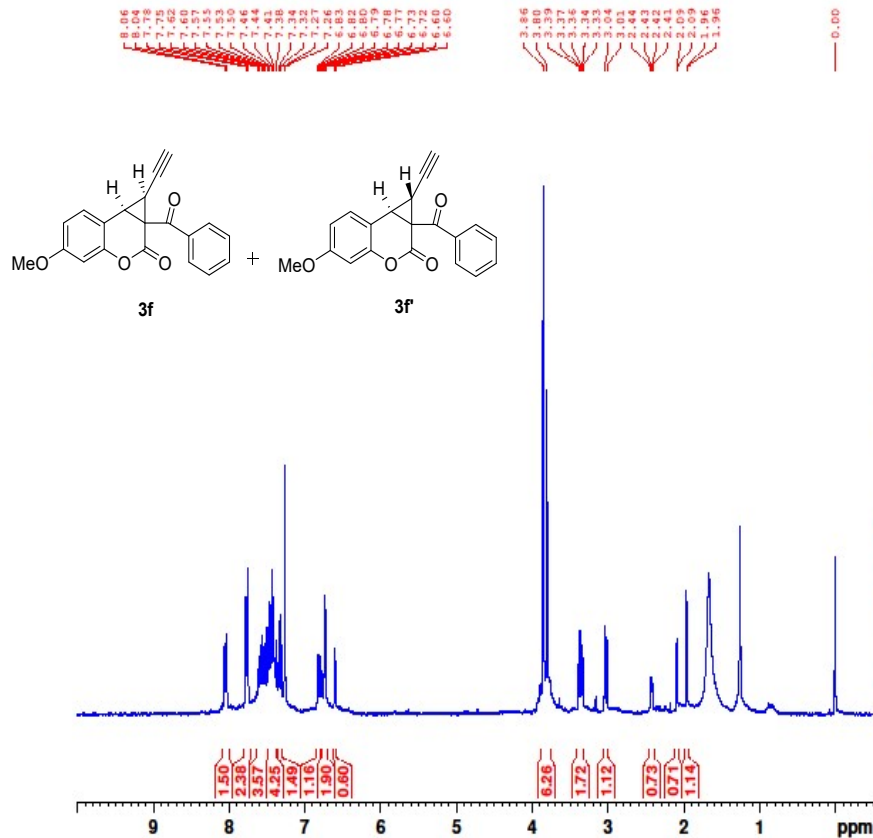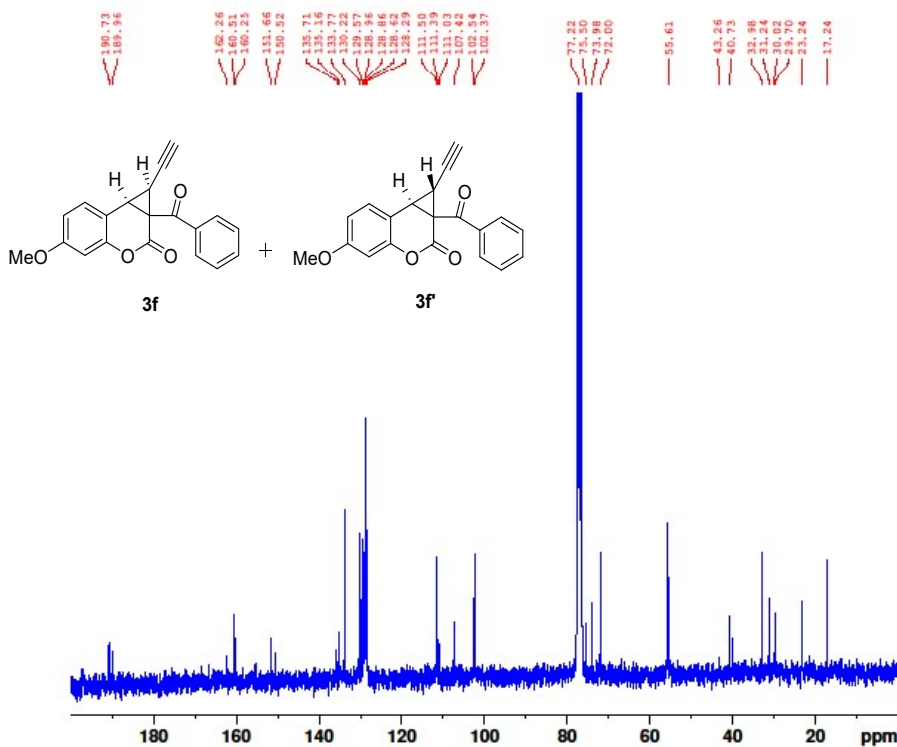

8.30  
8.30  
8.27  
8.27  
8.22  
8.22  
8.19  
8.18  
8.13  
8.13  
8.03  
8.03  
7.78  
7.76  
7.67  
7.65  
7.62  
7.62  
7.58  
7.55  
7.52  
7.49  
7.49  
7.45  
7.45  
7.33  
7.30  
7.26  
7.20  
7.17

3.57  
3.56  
3.45  
3.44  
3.42  
3.42  
3.24  
3.21  
3.21  
2.60  
2.59  
2.58  
2.13  
2.12  
2.02  
2.01

-0.00

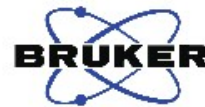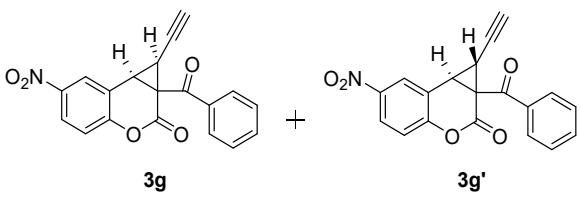

Current Data Parameters  
 NAME 231216-IA-L13  
 EXPNO 1  
 PROCNO 1

F2 - Acquisition Parameters  
 Date\_ 20231126  
 Time 17.09  
 INSTRUM spect  
 PROBHD 5 mm PABBO BS-  
 PULPROG zg30  
 TD 32768  
 ID 32768  
 SOLVENT CDC13  
 NS 16  
 DS 0  
 SWH 6009.615 Hz  
 FIDRES 0.183399 Hz  
 AQ 2.7262976 sec  
 RG 219.17  
 DW 83.200 usec  
 DE 12.63 usec  
 TE 297.7 K  
 D1 2.00000000 sec  
 TD0 1

==== CHANNEL f1 ====  
 SFO1 300.1318008 MHz  
 NUC1 1H  
 P1 14.00 usec  
 PLW1 7.69999981 W

F2 - Processing parameters  
 SI 16384  
 SF 300.1300062 MHz  
 WDW EM  
 SSB 0  
 LB 0 Hz  
 GB 0  
 PC 1.00

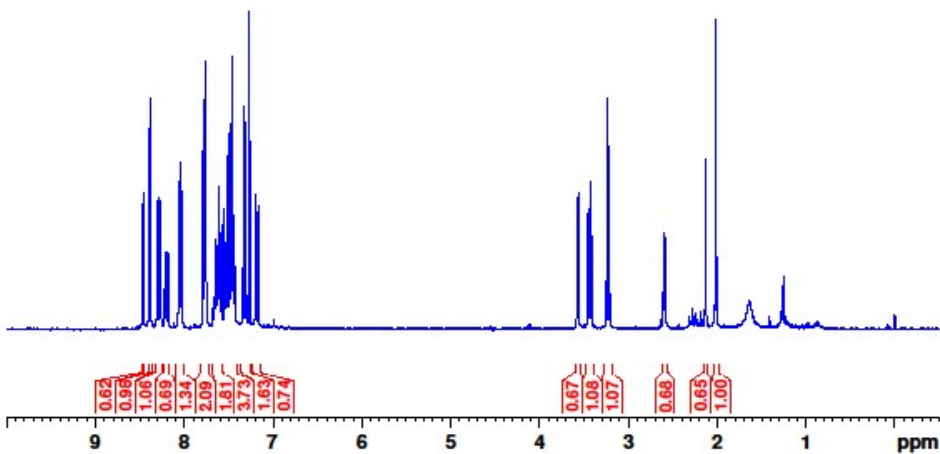

189.46  
188.85  
160.53  
154.74  
154.74  
154.48  
154.48  
153.20  
153.20  
152.24  
152.24  
152.16  
152.16  
152.00  
152.00  
152.41  
152.41  
152.20  
152.20  
152.99  
152.99  
152.45  
152.45  
150.58  
150.58  
148.08  
148.08  
137.07

77.46  
77.08  
76.97  
76.97  
75.03  
75.03  
74.28  
74.28  
73.03

40.31  
40.21  
32.19  
30.85  
23.28  
17.44

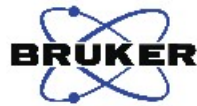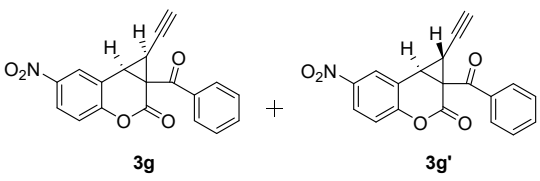

Current Data Parameters  
 NAME 231216-IA-L13  
 EXPNO 2  
 PROCNO 1

F2 - Acquisition Parameters  
 Date\_ 20231216  
 Time 17.24  
 INSTRUM spect  
 PROBHD 5 mm PABBO BB-  
 PULPROG zgpg30  
 TD 32768  
 ID 32768  
 SOLVENT CDC13  
 NS 2048  
 DS 0  
 SWH 18028.846 Hz  
 FIDRES 0.550197 Hz  
 AQ 0.9087659 sec  
 RG 219.17  
 DW 27.733 usec  
 DE 6.50 usec  
 TE 298.7 K  
 D1 2.00000000 sec  
 D11 0.03000000 sec  
 TD0 1

==== CHANNEL f1 ====  
 SFO1 75.4756726 MHz  
 NUC1 13C  
 P1 10.00 usec  
 PLW1 28.29999924 W

==== CHANNEL f2 ====  
 SFO2 300.1312005 MHz  
 NUC2 1H  
 CPDPRG2 bi\_waltz65\_256  
 PCPD2 90.00 usec  
 PLW2 8.30000019 W  
 PLW12 0.20084000 W  
 PLW13 0.16268000 W

F2 - Processing parameters  
 SI 32768  
 SF 75.4677485 MHz  
 WDW EM  
 SSB 0  
 LB 2.00 Hz  
 GB 0  
 PC 1.00

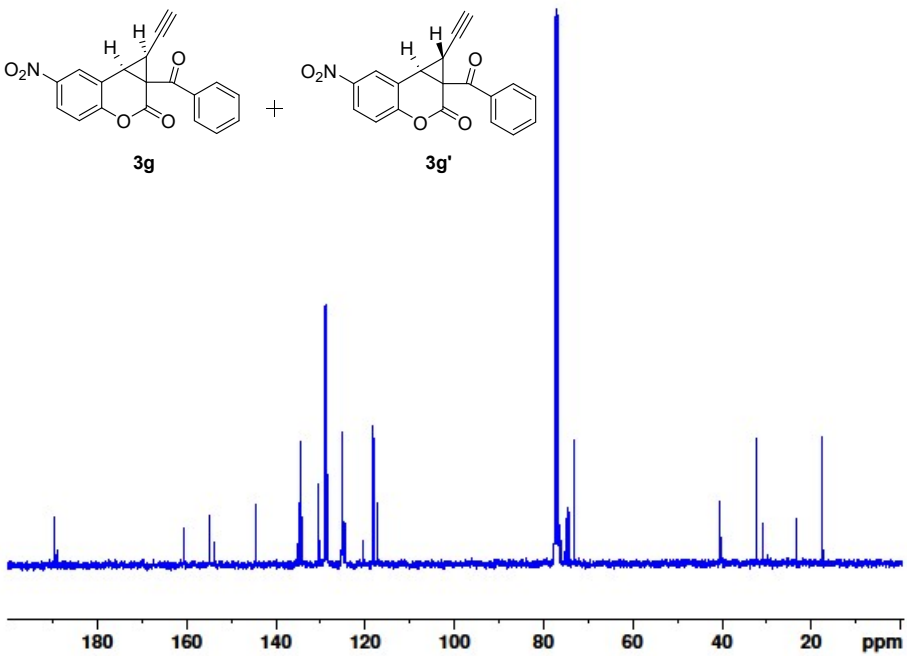

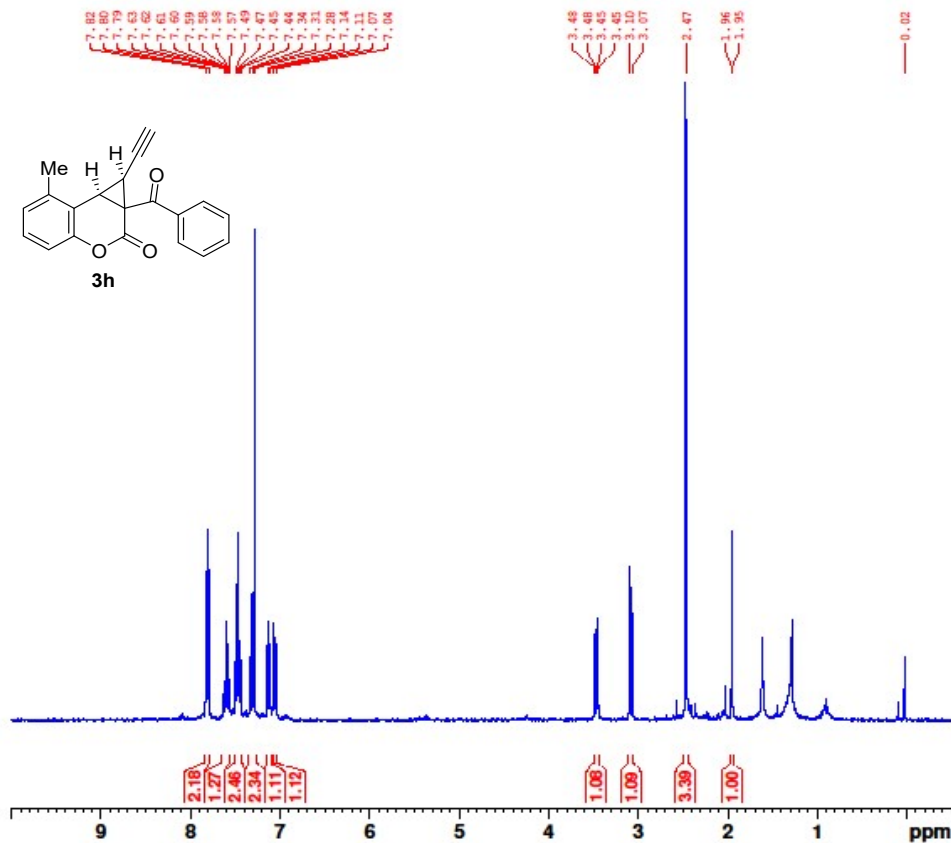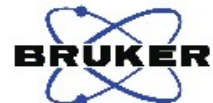

Current Data Parameters  
 NAME 240111-LA-L22  
 EXPNO 1  
 PROCNO 1

F2 - Acquisition Parameters  
 Date\_ 20240108  
 Time 12.44  
 INSTRUM spect  
 PROBHD 5 mm PABBO BB-  
 PULPROG zq30  
 TD 32768  
 SOLVENT CDCl3  
 NS 64  
 DS 0  
 SWH 6009.615 Hz  
 FIDRES 0.18339 Hz  
 AQ 2.7262976 sec  
 RG 219.17  
 DW 83.200 usec  
 DE 12.63 usec  
 TE 296.7 K  
 D1 2.00000000 sec  
 TD0 1

==== CHANNEL f1 =====  
 SFO1 300.1318008 MHz  
 NUC1 1H  
 P1 14.00 usec  
 PLW1 7.69999981 W

F2 - Processing parameters  
 SI 16384  
 SF 300.1300000 MHz  
 WDW EM  
 SSB 0  
 LB 0 Hz  
 GB 0  
 PC 1.00

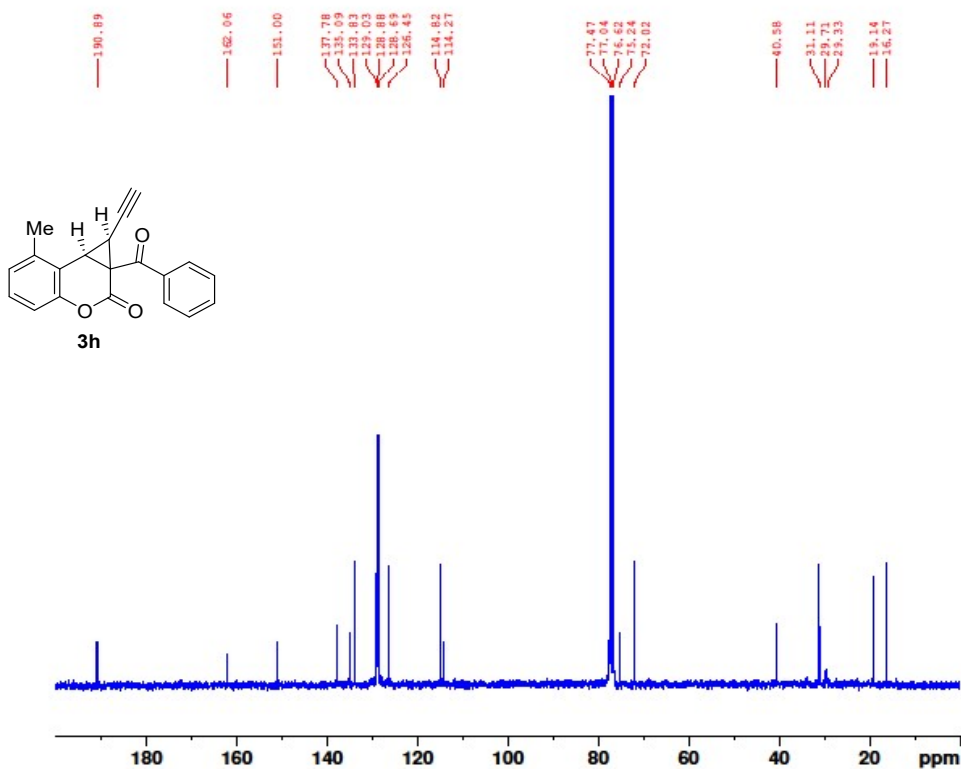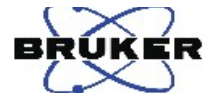

Current Data Parameters  
 NAME 240111-LA-L22  
 EXPNO 2  
 PROCNO 1

F2 - Acquisition Parameters  
 Date\_ 20240111  
 Time 16.51  
 INSTRUM spect  
 PROBHD 5 mm PABBO BB-  
 PULPROG zpgq30  
 TD 32768  
 SOLVENT CDCl3  
 NS 1737  
 DS 0  
 SWH 18028.846 Hz  
 FIDRES 0.550197 Hz  
 AQ 0.9087659 sec  
 RG 219.17  
 DW 27.733 usec  
 DE 6.50 usec  
 TE 297.6 K  
 D1 2.00000000 sec  
 D11 0.03000000 sec  
 TD0 1

==== CHANNEL f1 =====  
 SFO1 75.4756726 MHz  
 NUC1 13C  
 P1 10.00 usec  
 PLW1 28.29999924 W

==== CHANNEL f2 =====  
 SFO2 300.1312005 MHz  
 NUC2 1H  
 CPDPRG[2] bi\_waltz65\_256  
 PCPD2 90.00 usec  
 PLW2 8.30000019 W  
 PLW12 0.20084000 W  
 PLW13 0.16268000 W

F2 - Processing parameters  
 SI 32768  
 SF 75.4677485 MHz  
 WDW EM  
 SSB 0  
 LB 2.00 Hz  
 GB 0  
 PC 1.00

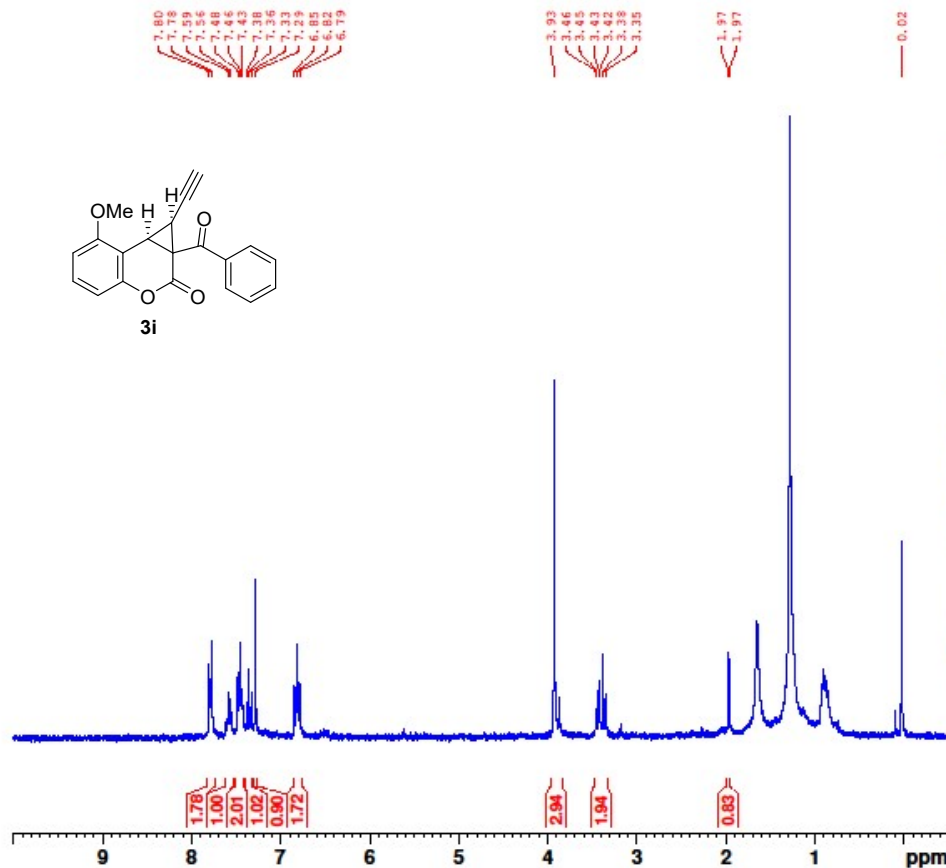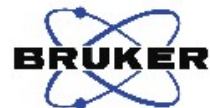

Current Data Parameters  
 NAME 240428-LA-L23-NEW  
 EXPNO 1  
 PROCNO 1

F2 - Acquisition Parameters  
 Date\_ 20240428  
 Time 21.46  
 INSTRUM spect  
 PROBHD 5 mm PABBO BB-  
 FULPROG zg30  
 TD 32768  
 SOLVENT CDCl3  
 NS 16  
 DS 0  
 SWH 6009.615 Hz  
 FIDRES 0.183399 Hz  
 AQ 2.7262976 sec  
 RG 219.17  
 DW 83.200 usec  
 DE 12.63 usec  
 TE 297.4 K  
 D1 2.00000000 sec  
 TD0 1

==== CHANNEL f1 =====  
 SFO1 300.1318008 MHz  
 NUC1 1H  
 P1 14.00 usec  
 PLW1 7.69999981 W

F2 - Processing parameters  
 SI 16384  
 SF 300.1300000 MHz  
 WDW EM  
 SSB 0  
 LB 0 Hz  
 GB 0  
 PC 1.00

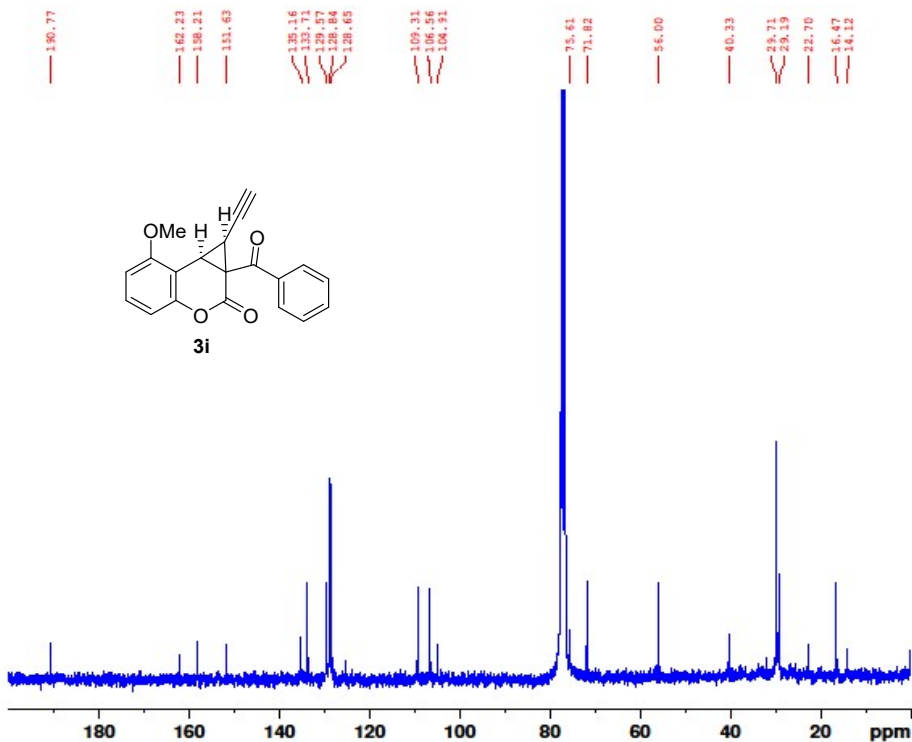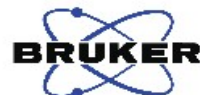

Current Data Parameters  
 NAME 240428-LA-L23-NEW  
 EXPNO 2  
 PROCNO 1

F2 - Acquisition Parameters  
 Date\_ 20240429  
 Time 9.37  
 INSTRUM spect  
 PROBHD 5 mm PABBO BB-  
 FULPROG zgpg30  
 TD 32768  
 SOLVENT CDCl3  
 NS 14336  
 DS 0  
 SWH 18028.846 Hz  
 FIDRES 0.550197 Hz  
 AQ 0.9087659 sec  
 RG 219.17  
 DW 27.733 usec  
 DE 6.50 usec  
 TE 298.6 K  
 D1 2.00000000 sec  
 D11 0.03000000 sec  
 TD0 1

==== CHANNEL f1 =====  
 SFO1 75.4756726 MHz  
 NUC1 13C  
 P1 10.00 usec  
 PLW1 28.29999924 W

==== CHANNEL f2 =====  
 SFO2 300.1312005 MHz  
 NUC2 1H  
 CPDPRG2 bi\_waltz65\_256  
 PCPD2 90.00 usec  
 PLW2 8.30000019 W  
 PLW12 0.20084000 W  
 PLW13 0.16268000 W

F2 - Processing parameters  
 SI 32768  
 SF 75.4677485 MHz  
 WDW EM  
 SSB 0  
 LB 2.00 Hz  
 GB 0  
 PC 1.00



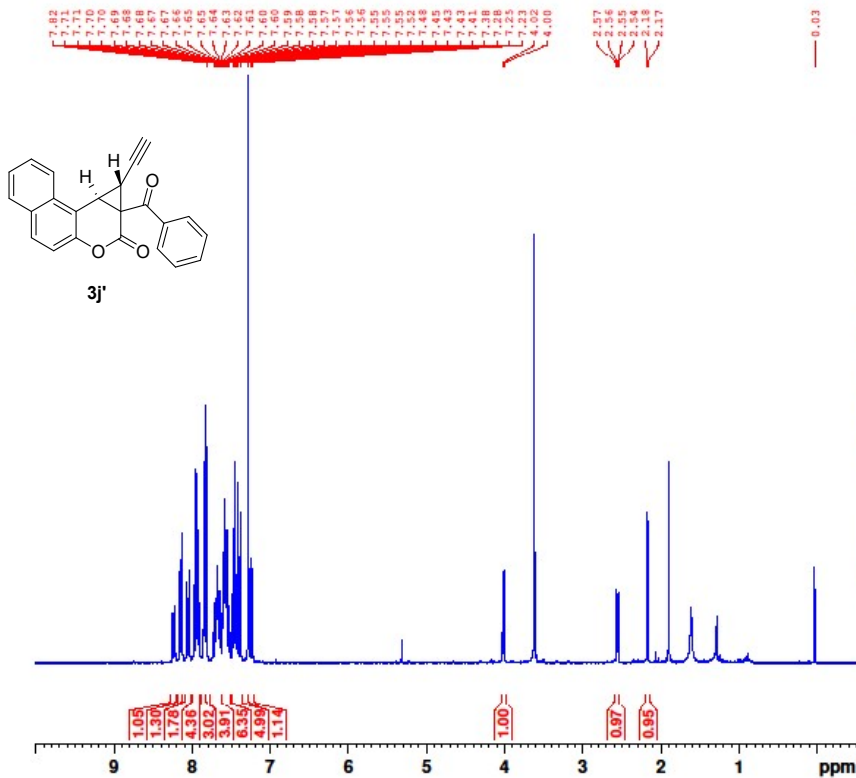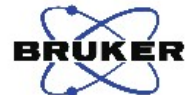

Current Data Parameters  
 NAME 240110-LA-L11  
 EXPNO 1  
 PROCNO 1

F2 - Acquisition Parameters  
 Date\_ 20240110  
 Time 14.04  
 INSTRUM spect  
 PROBHD 5 mm PABBO BB-  
 PULPROG zg30  
 TD 32768  
 SOLVENT CDC13  
 NS 64  
 DS 0  
 SWH 6009.615 Hz  
 FIDRES 0.183399 Hz  
 AQ 2.7262976 sec  
 RG 219.17  
 DW 83.200 usec  
 DE 12.63 usec  
 TE 297.3 K  
 D1 2.0000000 sec  
 TD0 1

==== CHANNEL f1 =====  
 SFO1 300.1318008 MHz  
 NUC1 1H  
 P1 14.00 usec  
 P1M1 7.69999981 W

F2 - Processing parameters  
 SI 16384  
 SF 300.1300000 MHz  
 WDW EM  
 SSB 0  
 LB 0 Hz  
 GB 0  
 PC 1.00

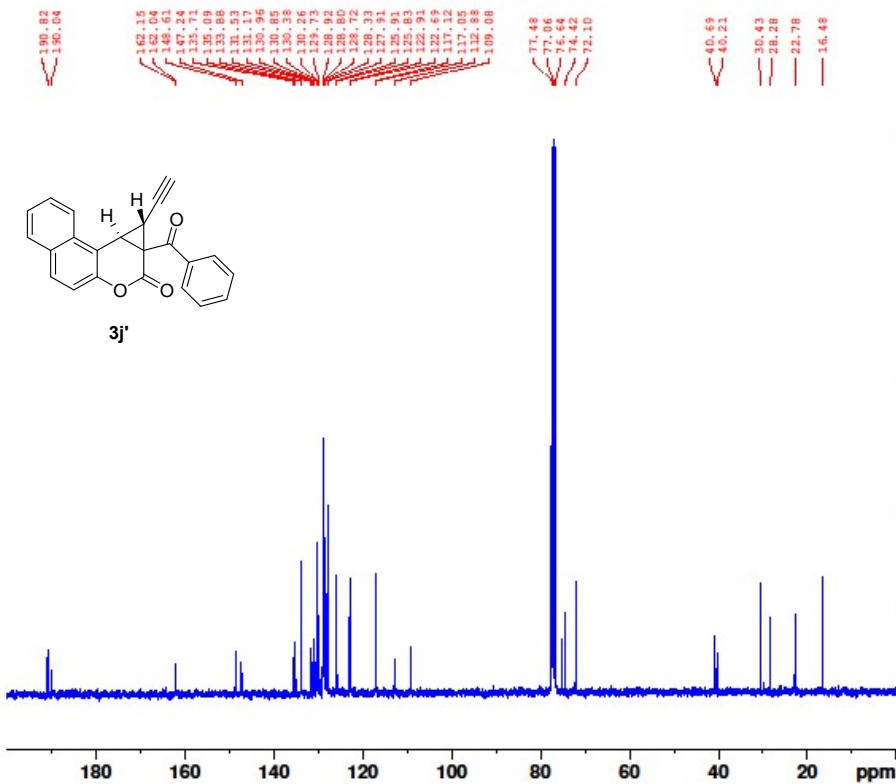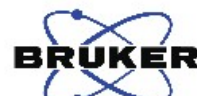

Current Data Parameters  
 NAME 240110-LA-L11  
 EXPNO 2  
 PROCNO 1

F2 - Acquisition Parameters  
 Date\_ 20231217  
 Time 18.31  
 INSTRUM spect  
 PROBHD 5 mm PABBO BB-  
 PULPROG zgpg30  
 TD 32768  
 SOLVENT CDC13  
 NS 2048  
 DS 0  
 SWH 18028.846 Hz  
 FIDRES 0.550197 Hz  
 AQ 0.9087659 sec  
 RG 219.17  
 DW 27.733 usec  
 DE 6.50 usec  
 TE 298.2 K  
 D1 2.0000000 sec  
 D11 0.0300000 sec  
 TD0 1

==== CHANNEL f1 =====  
 SFO1 75.4756726 MHz  
 NUC1 13C  
 P1 10.00 usec  
 P1M1 28.29999924 W

==== CHANNEL f2 =====  
 SFO2 300.1312005 MHz  
 NUC2 1H  
 CPDPRG2 bi\_waltz65\_256  
 PCPD2 90.00 usec  
 P1M2 8.30000019 W  
 P1M12 0.20084000 W  
 P1M13 0.16268000 W

F2 - Processing parameters  
 SI 32768  
 SF 75.4677485 MHz  
 WDW EM  
 SSB 0  
 LB 2.00 Hz  
 GB 0  
 PC 1.00

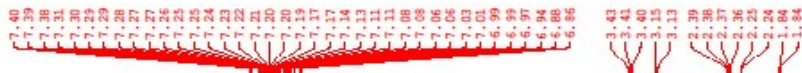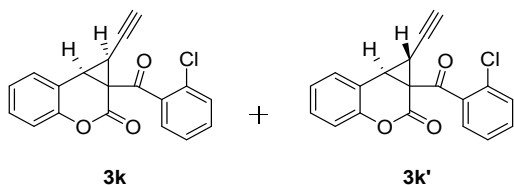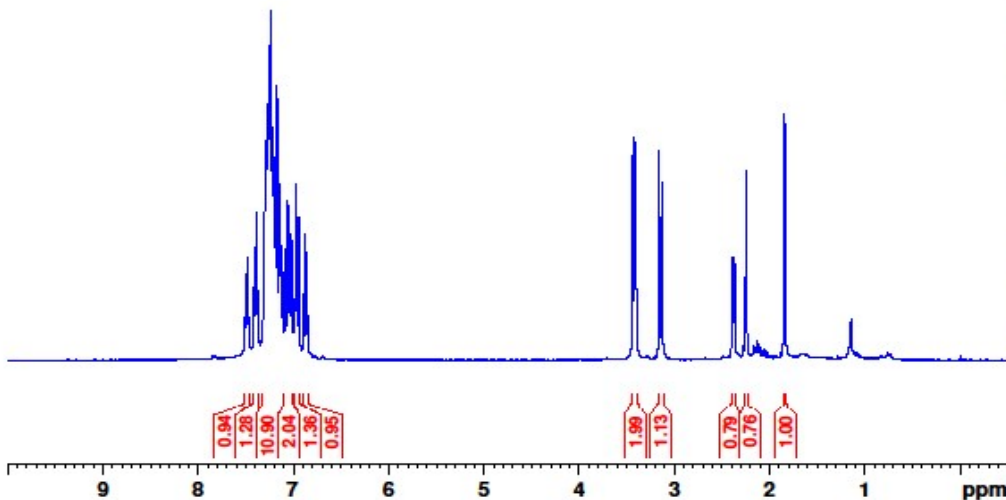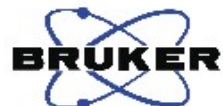

Current Data Parameters  
 NAME 231205-LA-L14  
 EXPNO 1  
 PROCNO 1

F2 - Acquisition Parameters  
 Date\_ 20231205  
 Time 19.52  
 INSTRUM spect  
 PROBHD 5 mm PABBO BB-  
 PULPROG zg30  
 TD 32768  
 SOLVENT CDCl3  
 NS 16  
 DS 0  
 SWH 6009.615 Hz  
 FIDRES 0.183399 Hz  
 AQ 2.7262976 sec  
 RG 36.7  
 DW 83.200 usec  
 DE 12.63 usec  
 TE 297.8 K  
 D1 2.0000000 sec  
 TD0 1

==== CHANNEL f1 =====  
 SFO1 300.1318008 MHz  
 NUC1 1H  
 P1 14.00 usec  
 PLW1 7.69999981 W

F2 - Processing parameters  
 SI 16384  
 SF 300.1300477 MHz  
 WDW EM  
 SSB 0  
 LB 0 Hz  
 GB 0  
 PC 1.00

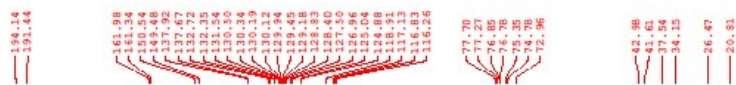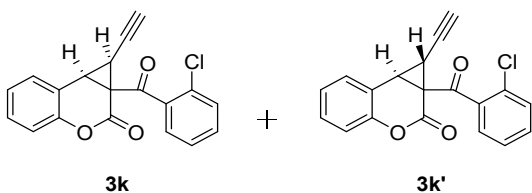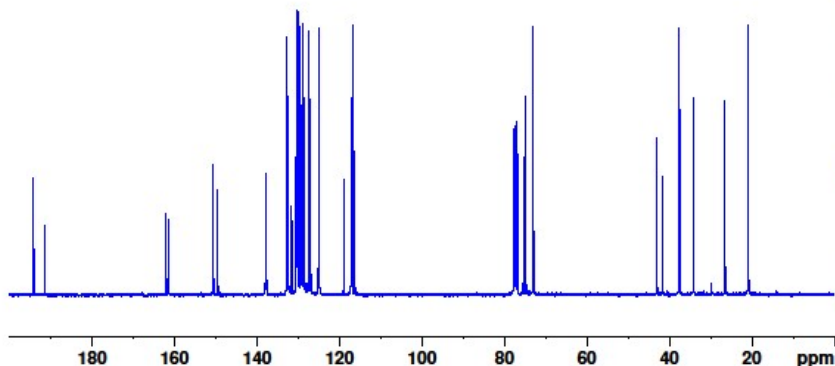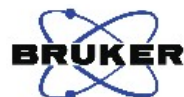

Current Data Parameters  
 NAME 231205-LA-L14  
 EXPNO 2  
 PROCNO 1

F2 - Acquisition Parameters  
 Date\_ 20231205  
 Time 21.36  
 INSTRUM spect  
 PROBHD 5 mm PABBO BB-  
 PULPROG zgpg30  
 TD 32768  
 SOLVENT CDCl3  
 NS 2048  
 DS 0  
 SWH 18028.846 Hz  
 FIDRES 0.550197 Hz  
 AQ 0.9087659 sec  
 RG 219.17  
 DW 27.733 usec  
 DE 6.50 usec  
 TE 299.3 K  
 D1 2.0000000 sec  
 D11 0.0300000 sec  
 TD0 1

==== CHANNEL f1 =====  
 SFO1 75.4756726 MHz  
 NUC1 13C  
 P1 10.00 usec  
 PLW1 28.29999924 W

==== CHANNEL f2 =====  
 SFO2 300.1312005 MHz  
 NUC2 1H  
 CPDPRG2 bi\_waltz65\_256  
 PCPD2 90.00 usec  
 PLW2 8.30000019 W  
 PLW12 0.20084000 W  
 PLW13 0.16268000 W

F2 - Processing parameters  
 SI 32768  
 SF 75.4677485 MHz  
 WDW EM  
 SSB 0  
 LB 2.00 Hz  
 GB 0  
 PC 1.00

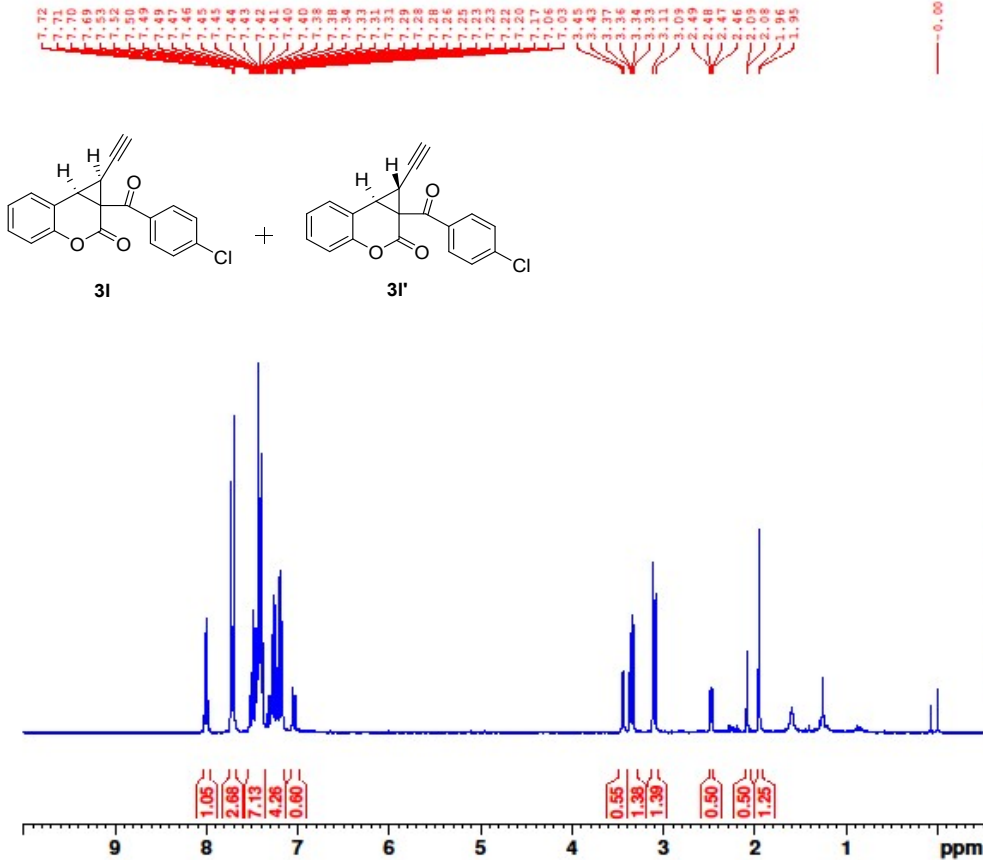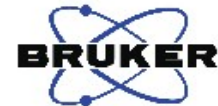

Current Data Parameters  
 NAME 240101-LA-L15  
 EXPNO 1  
 PROCNO 1

F2 - Acquisition Parameters  
 Date\_ 20240101  
 Time 17.02  
 INSTRUM spect  
 PROBHD 5 mm PABBO BB-  
 PULPROG zg30  
 TD 32768  
 SOLVENT CDCl3  
 NS 64  
 DS 0  
 SWH 6009.615 Hz  
 FIDRES 0.183399 Hz  
 AQ 2.7262976 sec  
 RG 219.17  
 DW 83.200 usec  
 DE 12.63 usec  
 TE 297.8 K  
 D1 2.0000000 sec  
 TDO 1

==== CHANNEL f1 =====  
 SFO1 300.1318008 MHz  
 NUC1 1H  
 P1 14.00 usec  
 PLW1 7.69999981 W

F2 - Processing parameters  
 SI 16384  
 SF 300.1300076 MHz  
 WDW EM  
 SSB 0  
 LB 0 Hz  
 GB 0  
 PC 1.00

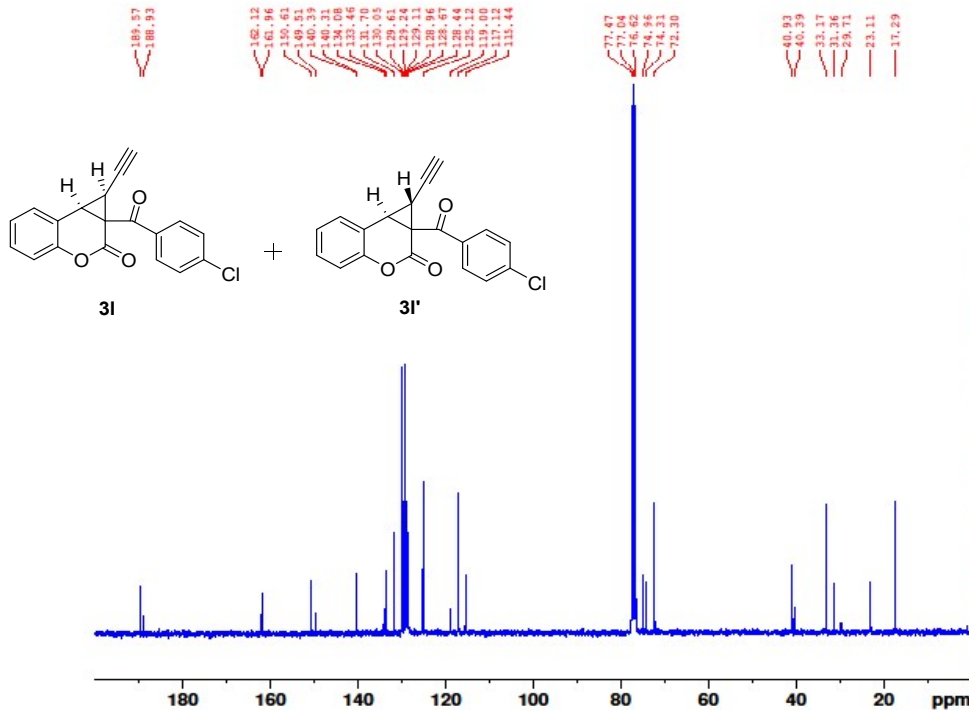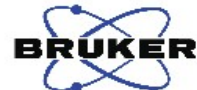

Current Data Parameters  
 NAME 240101-LA-L15  
 EXPNO 2  
 PROCNO 1

F2 - Acquisition Parameters  
 Date\_ 20240101  
 Time 18.49  
 INSTRUM spect  
 PROBHD 5 mm PABBO BB-  
 PULPROG zgpg30  
 TD 32768  
 SOLVENT CDCl3  
 NS 2048  
 DS 0  
 SWH 18028.846 Hz  
 FIDRES 0.550197 Hz  
 AQ 0.9087659 sec  
 RG 219.17  
 DW 27.733 usec  
 DE 6.50 usec  
 TE 298.5 K  
 D1 2.0000000 sec  
 D11 0.03000000 sec  
 TDO 1

==== CHANNEL F1 =====  
 SFO1 75.4756726 MHz  
 NUC1 13C  
 P1 10.00 usec  
 PLW1 28.29999924 W

==== CHANNEL F2 =====  
 SFO2 300.1312005 MHz  
 NUC2 1H  
 CPDPRG [2 bi\_waltz65\_256  
 PCPD2 90.00 usec  
 PLW2 8.30000019 W  
 PLW12 0.20984000 W  
 PLW13 0.16268000 W

F2 - Processing parameters  
 SI 32768  
 SF 75.4677485 MHz  
 WDW EM  
 SSB 0  
 LB 2.00 Hz  
 GB 0  
 PC 1.00

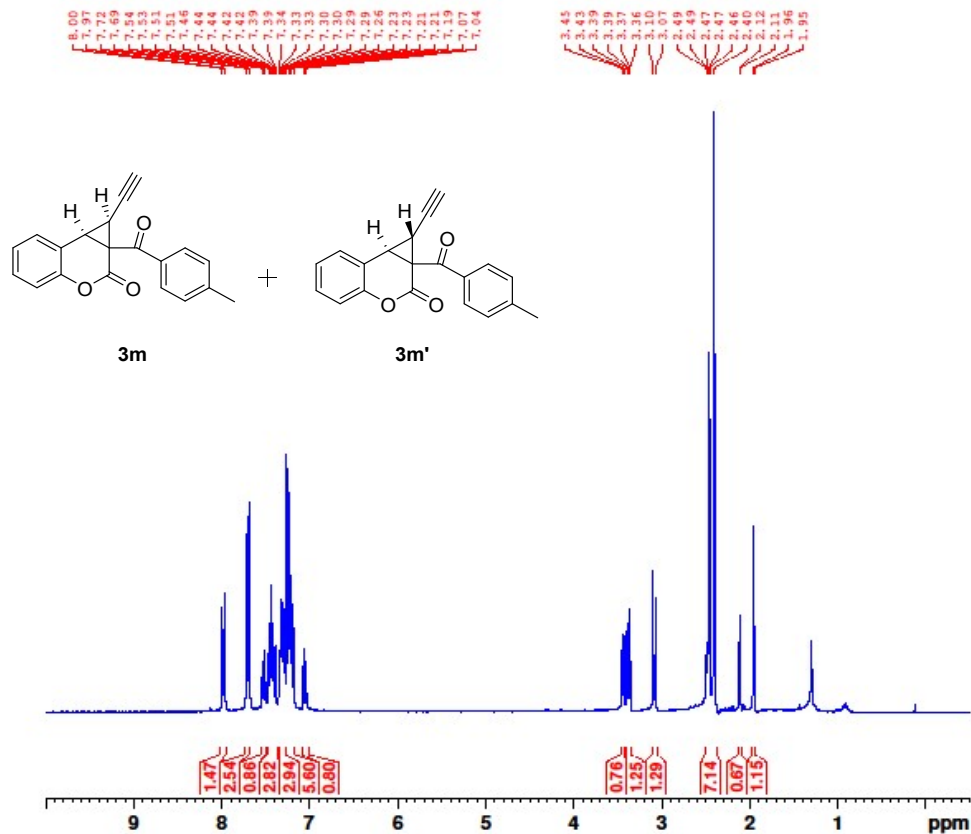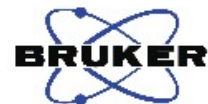

Current Data Parameters  
 NAME 231205-LA-L16  
 EXPNO 1  
 PROCNO 1

F2 - Acquisition Parameters  
 Date\_ 20231205  
 Time 22.08  
 INSTRUM spect  
 PROBHD 5 mm PABBO BB-  
 PULPROG zg30  
 TD 32768  
 SOLVENT CDCl3  
 NS 16  
 DS 0  
 SWH 6009.615 Hz  
 FIDRES 0.183399 Hz  
 AQ 2.7262976 sec  
 RG 96.06  
 DW 83.200 usec  
 DE 12.63 usec  
 TE 298.5 K  
 D1 2.00000000 sec  
 TD0 1

==== CHANNEL f1 =====  
 SFO1 300.1318008 MHz  
 NUC1 1H  
 F1 14.00 usec  
 PLW1 7.69999981 W

F2 - Processing parameters  
 SI 16384  
 SF 300.1300000 MHz  
 WDW EM  
 SSB 0  
 LB 0 Hz  
 GB 0  
 PC 1.00

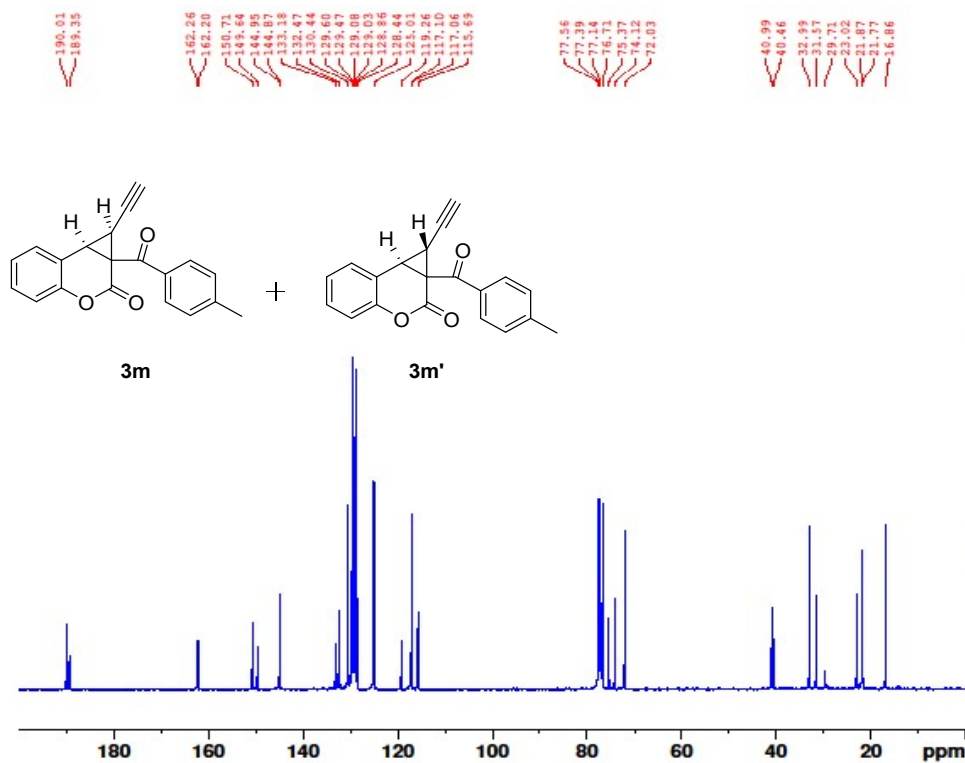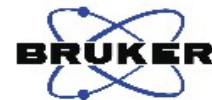

Current Data Parameters  
 NAME 231205-LA-L16  
 EXPNO 2  
 PROCNO 1

F2 - Acquisition Parameters  
 Date\_ 20231206  
 Time 6.39  
 INSTRUM spect  
 PROBHD 5 mm PABBO BB-  
 PULPROG zgpg30  
 TD 32768  
 SOLVENT CDCl3  
 NS 10240  
 DS 0  
 SWH 18028.846 Hz  
 FIDRES 0.550197 Hz  
 AQ 0.9087659 sec  
 RG 219.17  
 DW 27.733 usec  
 DE 6.50 usec  
 TE 298.9 K  
 D1 2.00000000 sec  
 D11 0.03000000 sec  
 TD0 1

==== CHANNEL f1 =====  
 SFO1 75.4756726 MHz  
 NUC1 13C  
 F1 10.00 usec  
 PLW1 28.29999924 W

==== CHANNEL f2 =====  
 SFO2 300.1312005 MHz  
 NUC2 1H  
 CPDPRG[2] bi\_waltz65\_256  
 PCPD2 90.00 usec  
 PLW2 8.30000019 W  
 PLW12 0.20084000 W  
 PLW13 0.16268000 W

F2 - Processing parameters  
 SI 32768  
 SF 75.4677485 MHz  
 WDW EM  
 SSB 0  
 LB 2.00 Hz  
 GB 0  
 PC 1.00

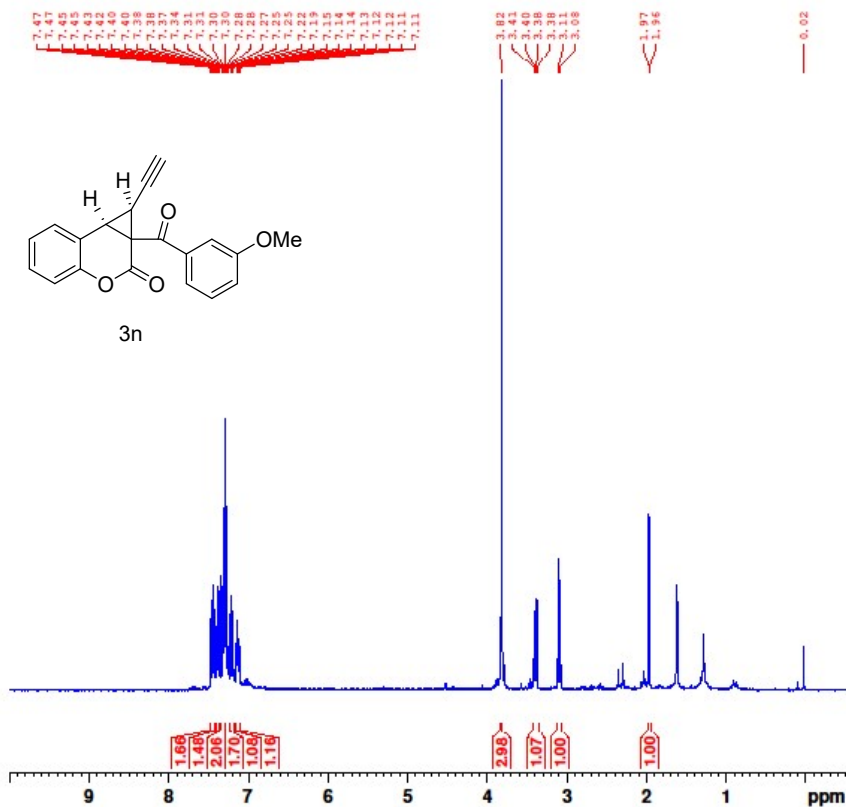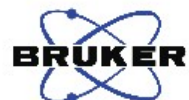

Current Data Parameters  
 NAME L17  
 EXPNO 1  
 PROCNO 1

F2 - Acquisition Parameters  
 Date\_ 20240115  
 Time 21.35  
 INSTRUM spect  
 PROBHD 5 mm PABBO BB-  
 PULPROG zg30  
 TD 32768  
 SOLVENT cdcl3  
 NS 16  
 DS 0  
 SWH 6009.615 Hz  
 FIDRES 0.183399 Hz  
 AQ 2.7262976 sec  
 RG 219.17  
 DW 83.200 usec  
 DE 12.63 usec  
 TE 297.5 K  
 D1 2.00000000 sec  
 TDO 1

==== CHANNEL f1 =====  
 SFO1 300.1318008 MHz  
 NUC1 1H  
 P1 14.00 usec  
 PLW1 7.69999981 W

F2 - Processing parameters  
 SI 16384  
 SF 300.1300000 MHz  
 WDW EM  
 SSB 0  
 LB 0 Hz  
 GB 0  
 PC 1.00

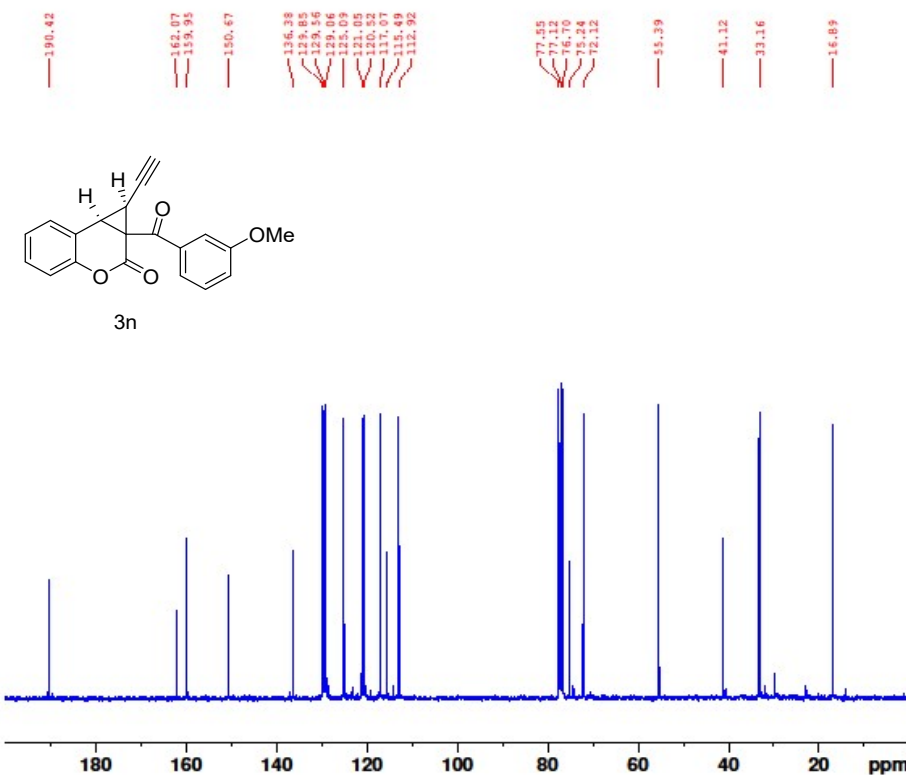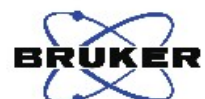

Current Data Parameters  
 NAME L17  
 EXPNO 2  
 PROCNO 1

F2 - Acquisition Parameters  
 Date\_ 20231204  
 Time 20.12  
 INSTRUM spect  
 PROBHD 5 mm PABBO BB-  
 PULPROG zgpg30  
 TD 32768  
 SOLVENT cdcl3  
 NS 2048  
 DS 0  
 SWH 18028.846 Hz  
 FIDRES 0.550197 Hz  
 AQ 0.9087659 sec  
 RG 219.17  
 DW 27.733 usec  
 DE 6.50 usec  
 TE 298.6 K  
 D1 2.00000000 sec  
 D11 0.03000000 sec  
 TDO 1

==== CHANNEL f1 =====  
 SFO1 75.4756726 MHz  
 NUC1 13C  
 P1 10.00 usec  
 PLW1 28.29999924 W

==== CHANNEL f2 =====  
 SFO2 300.1312005 MHz  
 NUC2 1H  
 CPDPRG[2] bi\_waltz65\_256  
 PCPD2 90.00 usec  
 PLW2 8.3000019 W  
 PLW12 0.20084000 W  
 PLW13 0.16268000 W

F2 - Processing parameters  
 SI 32768  
 SF 75.4677485 MHz  
 WDW EM  
 SSB 0  
 LB 2.00 Hz  
 GB 0  
 PC 1.00

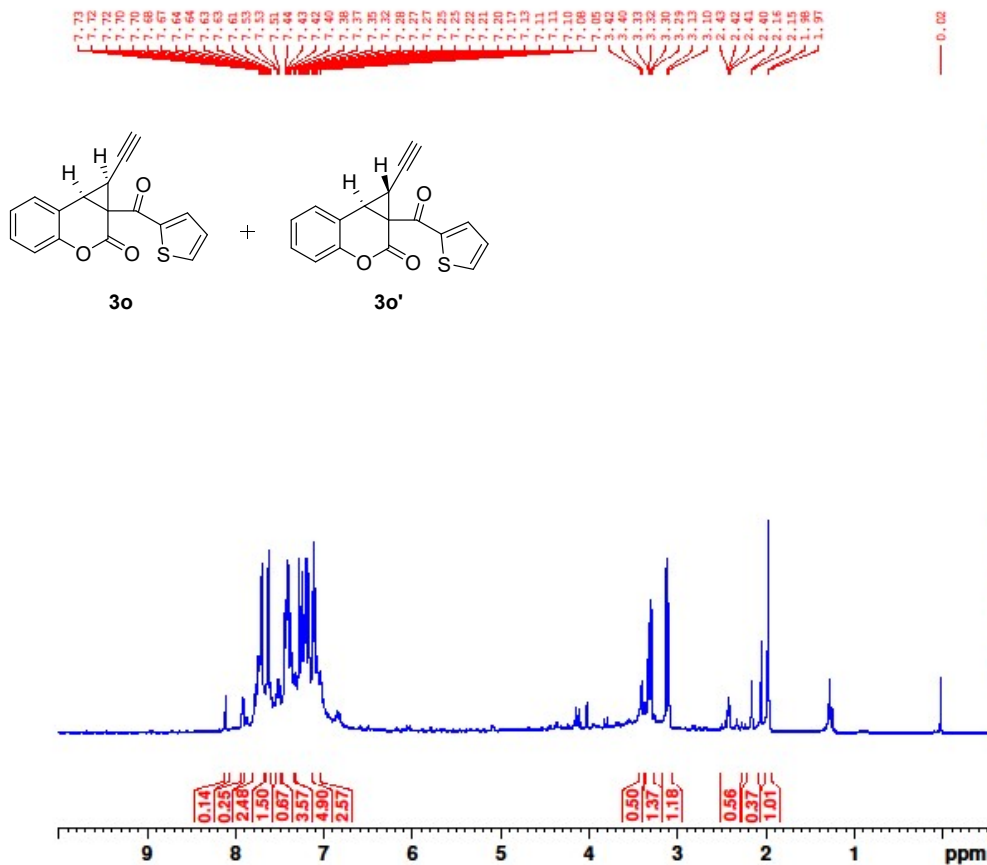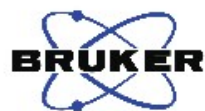

Current Data Parameters  
 NAME 240429-LA-3i-L24  
 EXPNO 1  
 PROCNO 1

F2 - Acquisition Parameters  
 Date\_ 20240429  
 Time 22.08  
 INSTRUM spect  
 PROBHD 5 mm PABBO BB-  
 PULPROG zg30  
 TD 32768  
 SOLVENT CDCl3  
 NS 16  
 DS 0  
 SWH 6009.615 Hz  
 FIDRES 0.183399 Hz  
 AQ 2.7262976 sec  
 RG 148.08  
 DW 83.200 usec  
 DE 12.63 usec  
 TE 297.5 K  
 D1 2.00000000 sec  
 TD0 1

==== CHANNEL f1 =====  
 SFO1 300.1318008 MHz  
 NUC1 1H  
 P1 14.00 usec  
 PLW1 7.69999981 W

F2 - Processing parameters  
 SI 16384  
 SF 300.1300000 MHz  
 WDW EM  
 SSB 0  
 LB 0 Hz  
 GB 0  
 PC 1.00

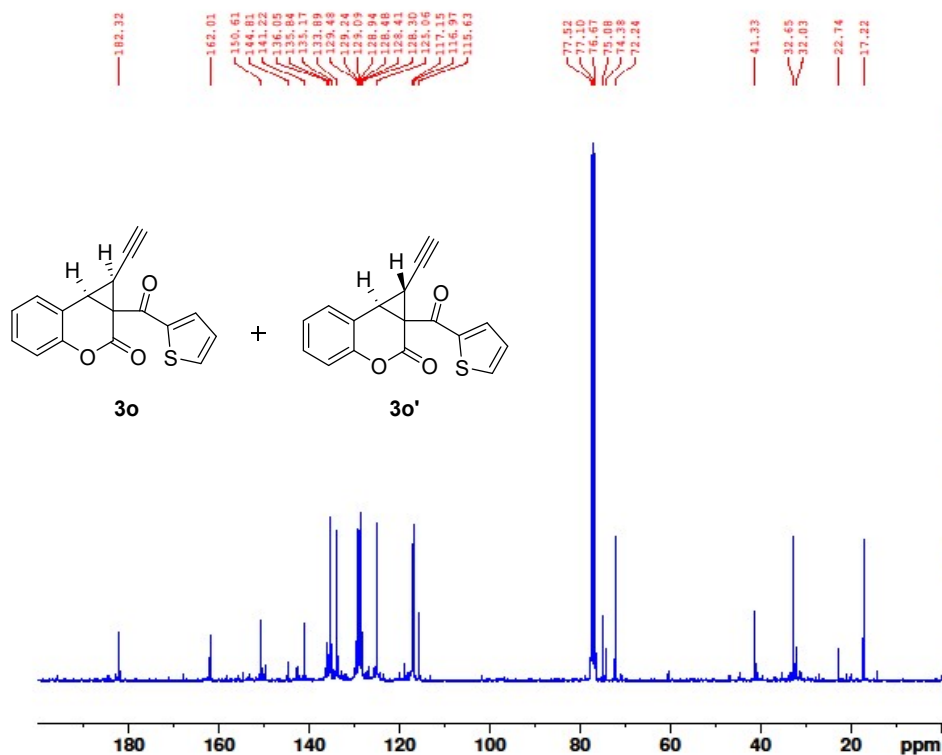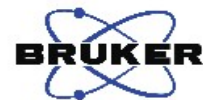

Current Data Parameters  
 NAME 240429-LA-3L-L24  
 EXPNO 2  
 PROCNO 1

F2 - Acquisition Parameters  
 Date\_ 20240430  
 Time 9.18  
 INSTRUM spect  
 PROBHD 5 mm PABBO BB-  
 PULPROG zgpg30  
 TD 32768  
 SOLVENT CDCl3  
 NS 12288  
 DS 0  
 SWH 18028.846 Hz  
 FIDRES 0.550197 Hz  
 AQ 0.9087659 sec  
 RG 219.17  
 DW 27.733 usec  
 DE 6.50 usec  
 TE 297.9 K  
 D1 2.00000000 sec  
 D11 0.03000000 sec  
 TD0 1

==== CHANNEL f1 =====  
 SFO1 75.4756726 MHz  
 NUC1 13C  
 P1 10.00 usec  
 PLW1 28.29999924 W

==== CHANNEL f2 =====  
 SFO2 300.1312005 MHz  
 NUC2 1H  
 CPDPRG2 bi\_waltz65\_256  
 FCPD2 90.00 usec  
 PLW2 8.30000019 W  
 PLW12 0.20084000 W  
 PLW13 0.16268000 W

F2 - Processing parameters  
 SI 32768  
 SF 75.4677485 MHz  
 WDW EM  
 SSB 0  
 LB 2.00 Hz  
 GB 0  
 PC 1.00

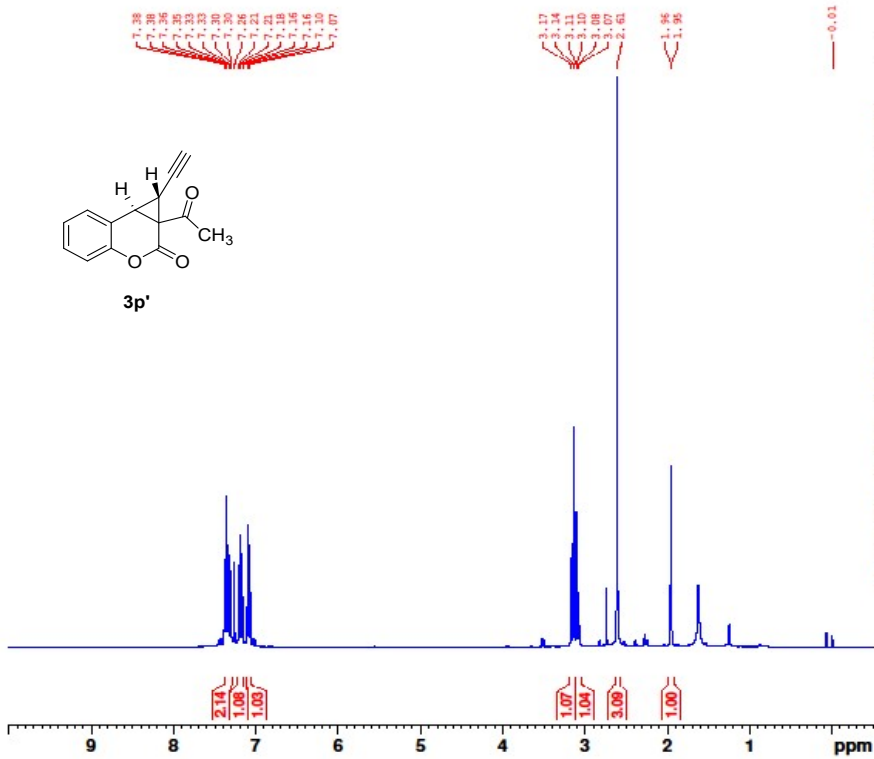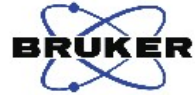

Current Data Parameters  
 NAME L18\_1H  
 EXPNO 1  
 PROCNO 1

F2 - Acquisition Parameters  
 Date\_ 20231116  
 Time 17.10  
 INSTRUM spect  
 PROBHD 5 mm PABBO BB-  
 PULPROG zg30  
 TD 32768  
 ID 32768  
 SOLVENT CDCl3  
 NS 64  
 DS 0  
 SWH 6009.615 Hz  
 FIDRES 0.183399 Hz  
 AQ 2.7262976 sec  
 RG 219.17  
 DW 93.200 usec  
 DE 12.63 usec  
 TE 297.3 K  
 D1 2.0000000 sec  
 TD0 1

==== CHANNEL f1 =====  
 SFO1 300.1318008 MHz  
 NUC1 1H  
 F1 14.00 usec  
 PLW1 7.69999981 W

F2 - Processing parameters  
 SI 16384  
 SF 300.1300079 MHz  
 WDW EM  
 SSB 0  
 LB 0 Hz  
 GB 0  
 FC 1.00

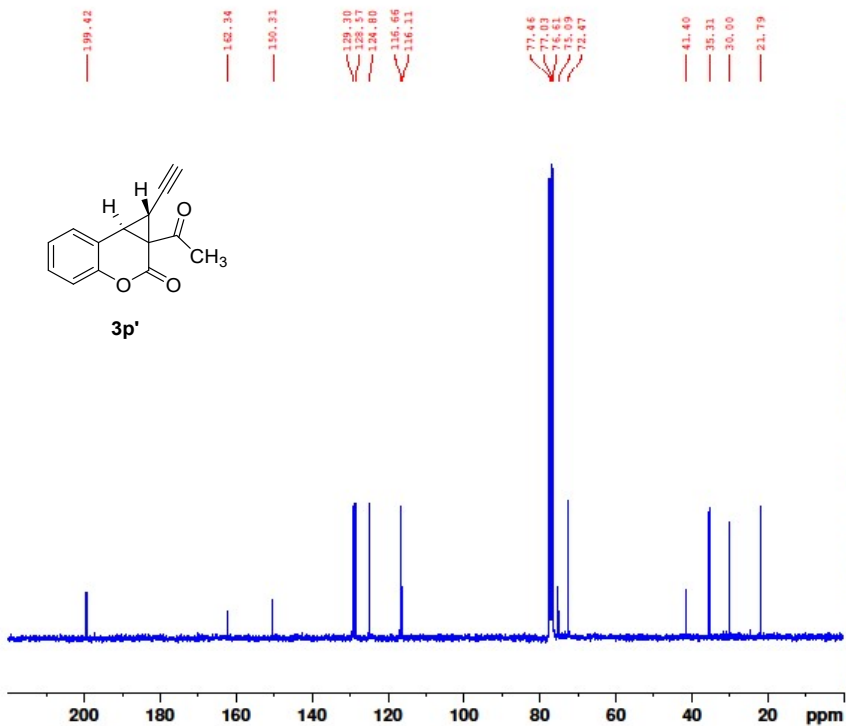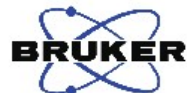

Current Data Parameters  
 NAME L18\_1H  
 EXPNO 2  
 PROCNO 1

F2 - Acquisition Parameters  
 Date\_ 20231116  
 Time 18.50  
 INSTRUM spect  
 PROBHD 5 mm PABBO BB-  
 PULPROG zgpg30  
 TD 32768  
 ID 32768  
 SOLVENT CDCl3  
 NS 2048  
 DS 0  
 SWH 18028.846 Hz  
 FIDRES 0.550197 Hz  
 AQ 0.9087659 sec  
 RG 219.17  
 DW 27.733 usec  
 DE 6.50 usec  
 TE 298.5 K  
 D1 2.0000000 sec  
 D11 0.03000000 sec  
 TD0 1

==== CHANNEL f1 =====  
 SFO1 75.4756726 MHz  
 NUC1 13C  
 F1 10.00 usec  
 PLW1 28.29999924 W

==== CHANNEL f2 =====  
 SFO2 300.1312005 MHz  
 NUC2 1H  
 CPDPRG2 bi\_waltz65\_256  
 PCPD2 90.00 usec  
 PLW2 8.30000019 W  
 PLW12 0.20084000 W  
 PLW13 0.16268000 W

F2 - Processing parameters  
 SI 32768  
 SF 75.4677485 MHz  
 WDW EM  
 SSB 0  
 LB 2.00 Hz  
 GB 0  
 FC 1.00

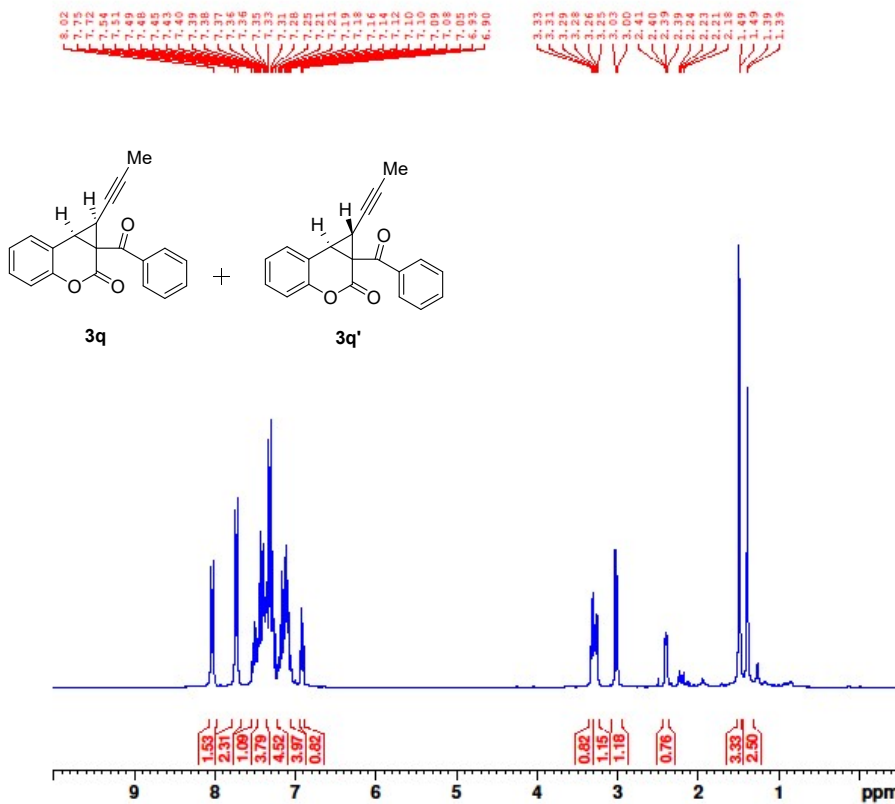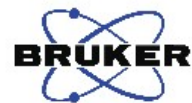

Current Data Parameters  
 NAME 231207-1A-119  
 EXPNO 1  
 PROCNO 1

F2 - Acquisition Parameters  
 Date\_ 20231207  
 Time 11.14  
 INSTRUM spect  
 PROBHD 5 mm PABBO BB-  
 PULPROG zg30  
 TD 32768  
 SOLVENT CDCl3  
 NS 64  
 DS 0  
 SWH 6009.615 Hz  
 FIDRES 0.183399 Hz  
 AQ 2.7262976 sec  
 RG 20.26  
 DW 83.200 usec  
 DE 12.63 usec  
 TE 297.6 K  
 D1 2.0000000 sec  
 TDO 1

==== CHANNEL f1 =====  
 SFO1 300.1318008 MHz  
 NUC1 1H  
 P1 14.00 usec  
 PLW1 7.69999981 W

F2 - Processing parameters  
 SI 16384  
 SF 300.1300082 MHz  
 NEW EM  
 SSB 0  
 LB 0 Hz  
 GB 0  
 PC 1.00

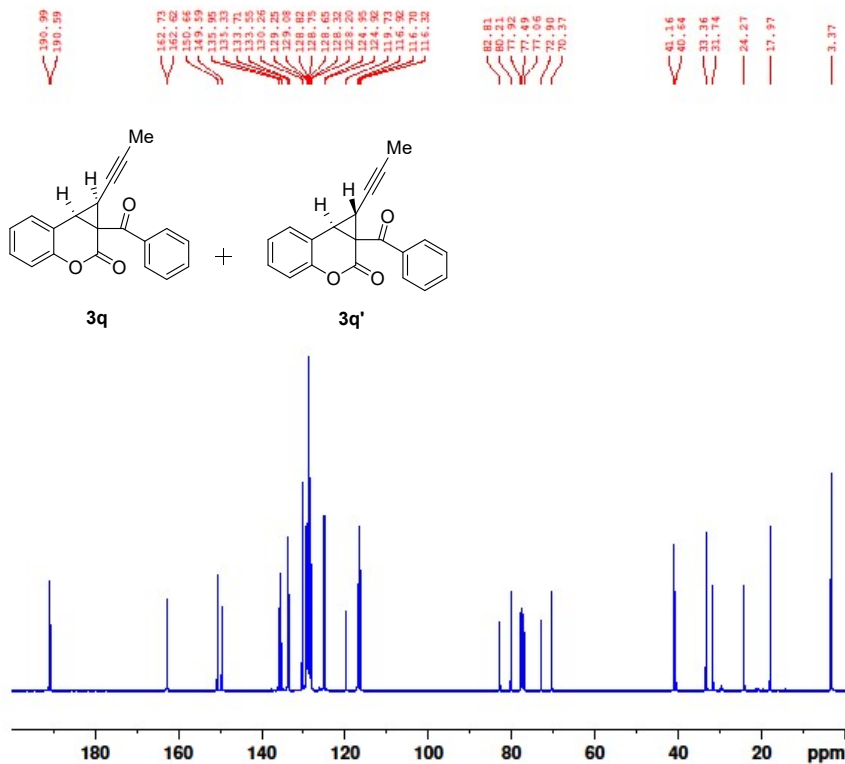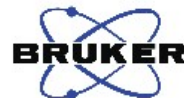

Current Data Parameters  
 NAME 231207-1A-119  
 EXPNO 2  
 PROCNO 1

F2 - Acquisition Parameters  
 Date\_ 20231207  
 Time 12.55  
 INSTRUM spect  
 PROBHD 5 mm PABBO BB-  
 PULPROG zgpg30  
 TD 32768  
 SOLVENT CDCl3  
 NS 2048  
 DS 0  
 SWH 18028.846 Hz  
 FIDRES 0.550197 Hz  
 AQ 0.9087659 sec  
 RG 219.17  
 DW 27.733 usec  
 DE 6.50 usec  
 TE 297.7 K  
 D1 2.0000000 sec  
 D11 0.03000000 sec  
 TDO 1

==== CHANNEL f1 =====  
 SFO1 75.4756726 MHz  
 NUC1 13C  
 P1 10.00 usec  
 PLW1 28.29999924 W

==== CHANNEL F2 =====  
 SFO2 300.1312005 MHz  
 NUC2 1H  
 CPDPRG[2 bi\_waltz65\_256  
 PCPD2 90.00 usec  
 PLW2 8.30000019 W  
 PLW12 0.20084000 W  
 PLW13 0.16268000 W

F2 - Processing parameters  
 SI 32768  
 SF 75.4677485 MHz  
 NEW EM  
 SSB 0  
 LB 2.00 Hz  
 GB 0  
 PC 1.00



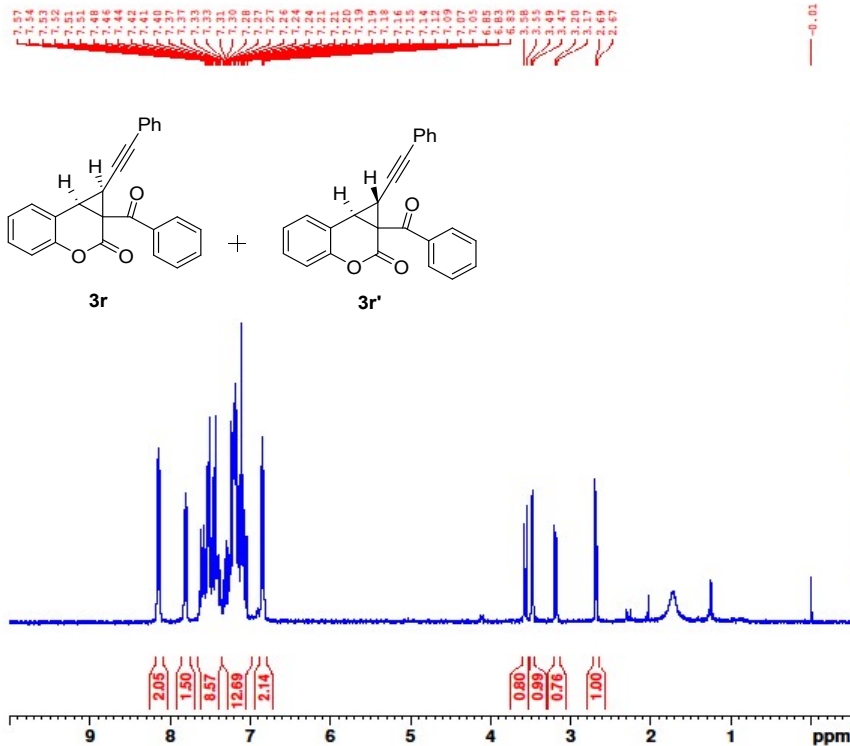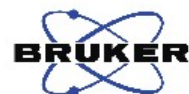

Current Data Parameters  
 NAME 240121-LA-L20  
 EXPNO 1  
 PROCNO 1

F2 - Acquisition Parameters  
 Date\_ 20240121  
 Time 18.15  
 INSTRUM spect  
 PROBHD 5 mm PABBO BB-  
 PULPROG zg30  
 ID 32768  
 SOLVENT CDCl3  
 NS 64  
 DS 0  
 SWH 6009.615 Hz  
 FIDRES 0.183399 Hz  
 AQ 2.7262976 sec  
 RG 219.17  
 DW 83.200 usec  
 DE 12.63 usec  
 TE 297.8 K  
 D1 2.00000000 sec  
 TDO 1

==== CHANNEL f1 =====  
 SFO1 300.1318008 MHz  
 NUC1 1H  
 P1 14.00 usec  
 PLW1 7.69999981 W

F2 - Processing parameters  
 SI 16384  
 SF 300.1300119 MHz  
 WDW EM  
 SSB 0  
 LB 0 Hz  
 GB 0  
 PC 1.00

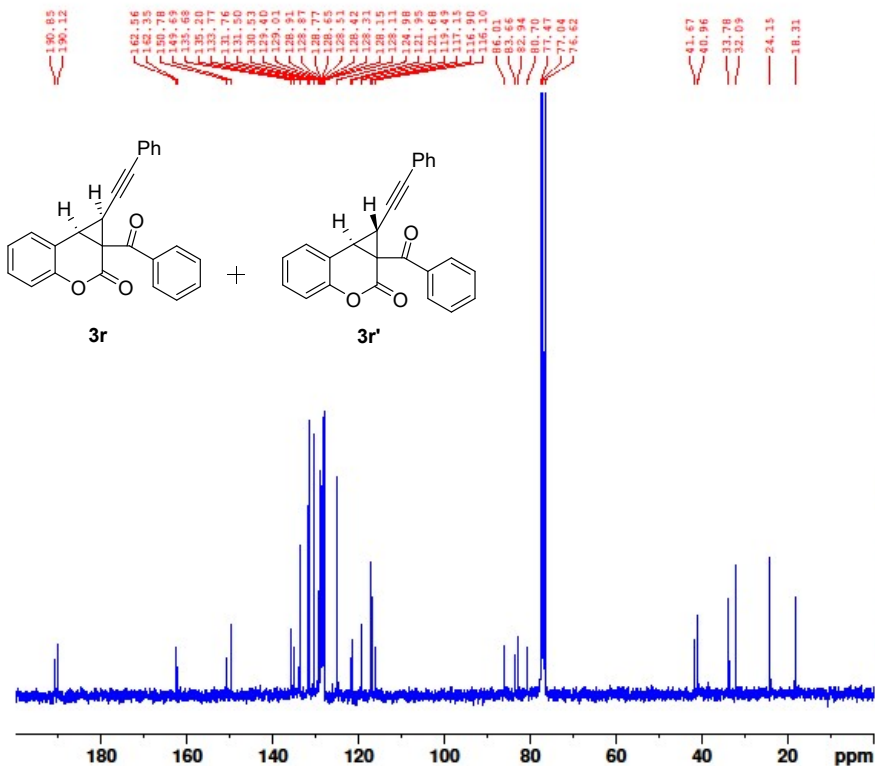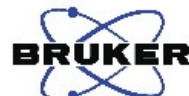

Current Data Parameters  
 NAME 240121-LA-L20  
 EXPNO 2  
 PROCNO 1

F2 - Acquisition Parameters  
 Date\_ 20240121  
 Time 19.50  
 INSTRUM spect  
 PROBHD 5 mm PABBO BB-  
 PULPROG zgpg30  
 TD 32768  
 SOLVENT CDCl3  
 NS 1912  
 DS 0  
 SWH 18028.846 Hz  
 FIDRES 0.550197 Hz  
 AQ 0.9087659 sec  
 RG 219.17  
 DW 27.733 usec  
 DE 6.50 usec  
 TE 298.5 K  
 D1 2.00000000 sec  
 D11 0.03000000 sec  
 TDO 1

==== CHANNEL f1 =====  
 SFO1 75.4756726 MHz  
 NUC1 13C  
 P1 10.00 usec  
 PLW1 28.29999924 W

==== CHANNEL f2 =====  
 SFO2 300.1312005 MHz  
 NUC2 1H  
 CPDPRG2 bi\_waltz65\_256  
 FPCD2 90.00 usec  
 PLW2 8.30000019 W  
 PLW12 0.20084000 W  
 PLW13 0.16268000 W

F2 - Processing parameters  
 SI 32768  
 SF 75.4677485 MHz  
 WDW EM  
 SSB 0  
 LB 2.00 Hz  
 GB 0  
 PC 1.00

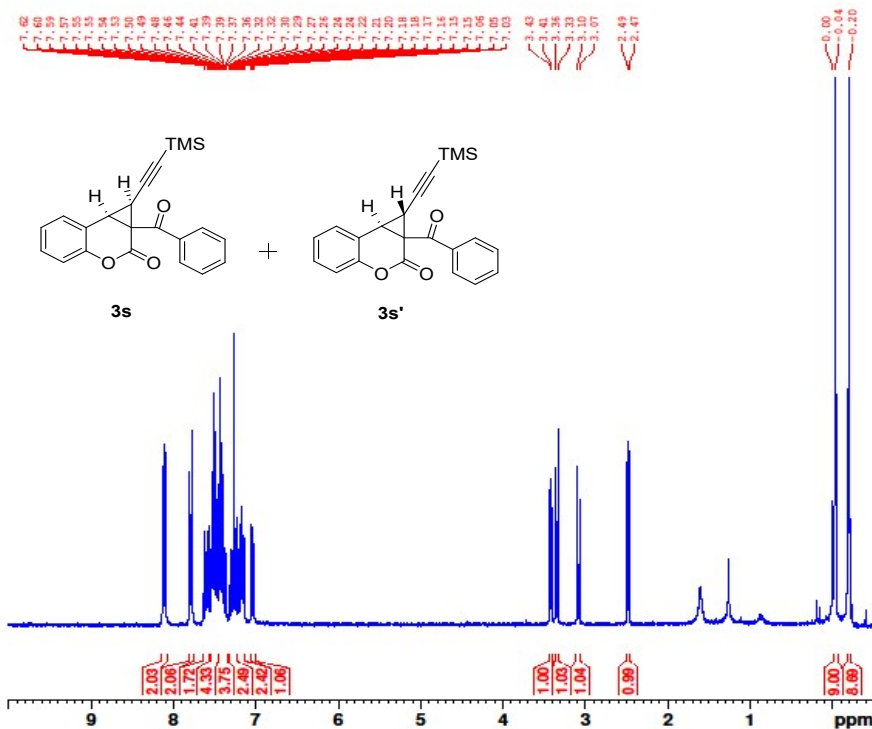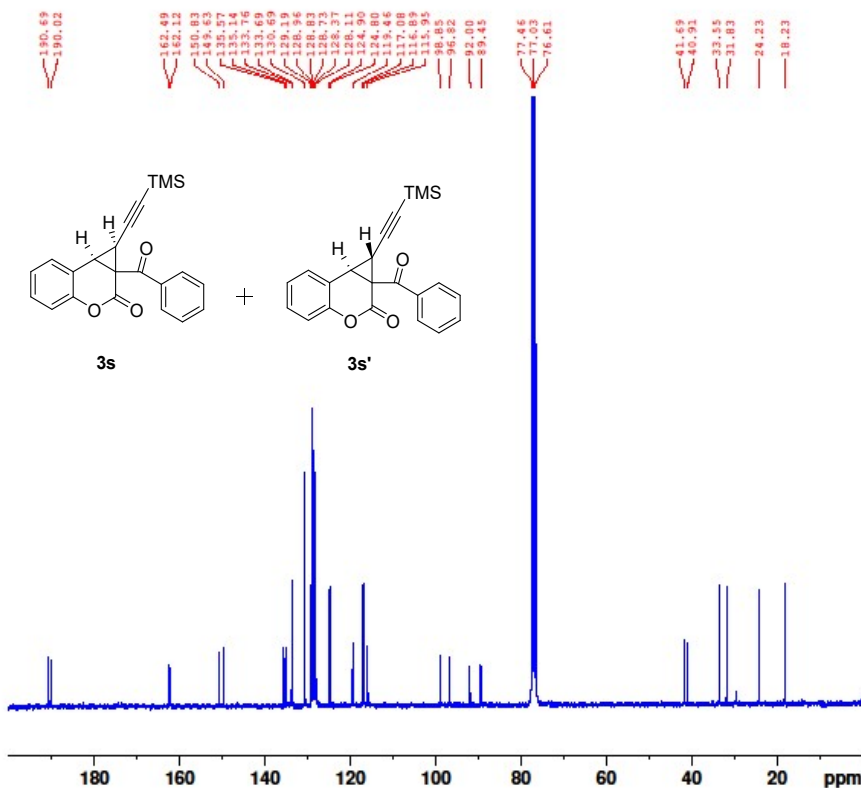

Supplement: d4ob01089b1.pdf [file d4ob01089b1.pdf]
